# Supplementary material for: Ligand-modulated phosphine-free Ni(ii) complexes for Z-selective semi-transfer hydrogenation of alkynes and dual transfer hydrogenation of α,β-unsaturated ketones using ammonia borane
Source: Royal Society of Chemistry journal article supplement (doi:10.1039/d4qo02326a), 2025-01-01
Supplement: d4qo02326a1.pdf [file d4qo02326a1.pdf]

## Supporting Information

### **Ligand-modulated phosphine-free Ni(II) complexes for Z-selective semi-transfer hydrogenation of alkynes and dual transfer hydrogenation of $\alpha,\beta$ -unsaturated ketones using ammonia-borane**

Tanmoy Kumar Ghosh, Anirban Sau, Divya Mahapatra and Sabuj Kundu\*

Department of Chemistry, Indian Institute of Technology Kanpur, Kanpur-208016, Uttar Pradesh (U.P.), India

## Table of Contents

|                                                                         |           |
|-------------------------------------------------------------------------|-----------|
| (1) General Consideration                                               | S3        |
| (2) Synthesis of Alkynes Derivatives                                    | S3        |
| (3) Synthesis of $\alpha,\beta$ -Unsaturated Ketone Derivatives         | S3        |
| (4) Optimization for Transfer Hydrogenation of Alkynes                  | S4        |
| (5) Optimization for Dual Transfer Hydrogenation of Chalcones           | S4        |
| (6) Experimental Section                                                | S4-S8     |
| (7) X-ray Crystallographic data collection and refinement               | S9-S10    |
| (8) Description of the Structures                                       | S10-S16   |
| (9) Control Experiments                                                 | S16-S25   |
| (10) Computational Studies                                              | S25-S56   |
| (11) Spectral Data for alkynes and chalcones                            | S57-S65   |
| (12) Copies of $^1\text{H}$ and $^{13}\text{C}$ NMR Spectra of Products | S66-S108  |
| (13) Copies of $^{19}\text{F}$ NMR Spectra of Products                  | S109-S111 |
| (14) References                                                         | S111-S114 |

## 1. General Consideration

**1.1 Reagent Information:** All the experiments were carried out under air. The Glass apparatus were oven-dried immediately before use. Solvents were dried according to the literature. HPLC-grade Methanol was used. All commercially available reagents were purchased from Sigma-Aldrich, Alfa-Aesar, TCI, SD-fine, Avra, and Spectrochem. Silica gel was used for column chromatography unless otherwise stated. A gradient elution using hexane/ethyl acetate was performed, based on a silica TLC plate.

**1.2 Analytical Information:**  $^1\text{H}$  and  $^{13}\text{C}$  spectra were recorded on JEOL 400 MHz, and 500 MHz Spectrometer using  $\text{CDCl}_3$ ,  $\text{DMSO-}d_6$ , and  $\text{CD}_3\text{OD}$ . All  $^1\text{H}$  NMR experiments were reported in parts per million (ppm) units and were measured relative to the signals for residual chloroform (7.26 ppm), residual DMSO (2.5 ppm), and  $\text{CD}_3\text{OD}$  (3.31) in the deuterated solvent, unless otherwise stated and coupling constant ( $J$ ) was reported in hertz (Hz). All  $^1\text{H}$  decoupled  $^{13}\text{C}$  NMR spectra were reported in ppm relative to deuterated chloroform (77.16 ppm), and  $\text{DMSO-}d_6$  (39.5). All the GC analyses were performed using Perkin Elmer Clarus 600 Gas Chromatograph and GC-MS were taken using Agilent 7890A Gas Chromatograph equipped with Agilent 5890 triple-quadrupole mass system.

## 2. Synthesis of Alkynes Derivatives:<sup>1</sup>

The corresponding aryl iodide (1 equiv),  $\text{Pd}(\text{PPh}_3)_4$  (5 mol%),  $\text{CuI}$  (1-2 mol%), and phenylacetylene (1-1.1 equiv) were added to a 50 mL Schlenk flask with a stir bar under an atmosphere of nitrogen. Then tetrahydrofuran (10 mL) and triethylamine (10 mL) were added sequentially. The reaction mixture was then stirred at room temperature overnight. Afterward, 15 mL of water was added and the reaction mixture was extracted with EtOAc ( $3 \times 15$  mL). The combined organic fractions were washed with brine and dried over  $\text{Na}_2\text{SO}_4$ . After filtration, the solvent was removed under reduced pressure. The residue was purified by silica gel column chromatography using petroleum ether and ethyl acetate as the eluent. All the substrates were characterized by GC-MS analysis and  $^1\text{H}$  NMR spectroscopy.

## 3. Synthesis of $\alpha,\beta$ -Unsaturated Ketone Derivatives:<sup>2</sup>

An oven-dried 25 mL round bottom flask (RB) was charged with a magnetic stir-bar, aryl ketone derivative (1.0 mmol), and aldehyde derivative (1.0 mmol), followed by the addition of ethanol (5.0 mL). Then 10% aqueous solution of  $\text{NaOH}$  (1.5 equiv.) was added dropwise in the stirring solution under ice-cold conditions. The stirring was continued for 5 h. After completion

of the reaction, the reaction mixture was cooled in the refrigerator overnight and a yellowish-white precipitate was obtained. Then the precipitate was collected through filtration and washed with an ice-cold water-ethanol mixture until the pH of the filtrate becomes 7. Finally, the desired  $\alpha$ ,  $\beta$ -unsaturated ketone was purified through column chromatography (silica gel) using hexane-ethyl acetate as eluent. All the substrates were characterized by GC-MS analysis and  $^1\text{H}$  NMR spectroscopy.

#### 4. Optimization for Transfer Hydrogenation of Alkynes:

An oven-dried 4 mL screw cap vial was taken and charged with a magnetic stir-bar, alkyne **1a** (35.64 mg, 0.20 mmol), Cat. **4** (5 mol%), and AB (9.2 mg, 0.3 mmol), followed by the addition of methanol (1 mL). Then, the vial was sealed and placed in a preheated oil bath at 55 °C (oil bath temperature) for 12 h. After completion of the reaction, the tube was allowed to cool at room temperature. Then, the 25  $\mu\text{L}$  reaction mixture was syringed out and filtered through a small plug of silica and subjected to GC analysis using mesitylene as an internal standard to determine the conversion and yield of the product.

#### 5. Optimization for Dual Transfer Hydrogenation of Chalcones:

An oven-dried 4 mL screw cap vial was taken and charged with a magnetic stir-bar, chalcone **22a** (41.6 mg, 0.20 mmol), Cat. **1** (3 mol%), and AB (2 equiv), followed by the addition of methanol (1 mL). Then, the tube was sealed and placed in a preheated oil bath at 40 °C (oil bath temperature) for 3 h. After completion of the reaction, the tube was allowed to cool at room temperature. Then, the reaction mixture was subjected to  $^1\text{H}$  NMR analysis using 1,3,5-trimethoxybenzene as an internal standard to determine the conversion and yield of the product.

#### 6. Experimental Section

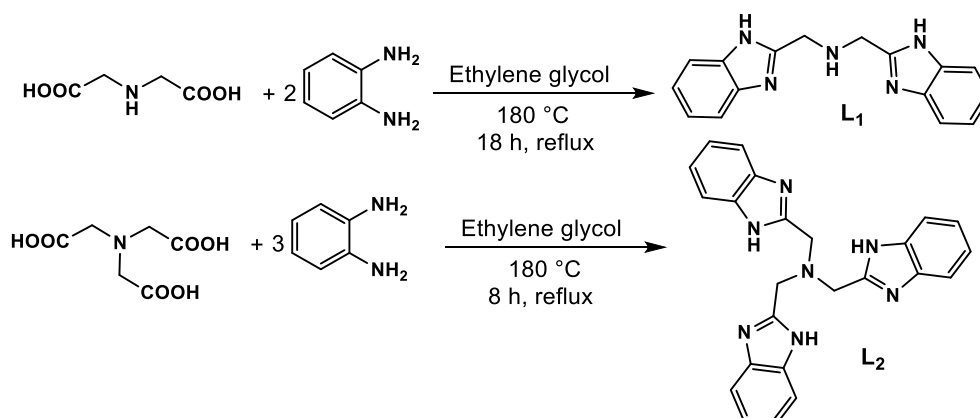

Scheme S1 Synthesis of ligands

## Synthesis of ligand bis((1H-benzoimidazol-2-yl)methyl)amine (L<sub>1</sub>)

The ligand (L<sub>1</sub> = bis(2-benzimidazolylmethyl)amine) was synthesized after slightly modifying the literature methods.<sup>3</sup> Aminodiacetic acid (0.665 g, 5 mmol) and *o*-phenylenediamine (1.081 g, 10 mmol) were refluxed in 30 mL ethylene glycol at 180 °C for 18 h. After cooling down to room temperature, a reddish crude product was obtained by adding water. Yield 0.915 g (66%). <sup>1</sup>H NMR (400 MHz, DMSO-*d*<sub>6</sub>) δ 12.26 (s, 2H), 7.51 (s, 4H), 7.14 (dd, *J* = 6.0, 3.1 Hz, 4H), 4.00 (s, 4H). <sup>13</sup>C NMR (100 MHz, DMSO-*d*<sub>6</sub>) δ 154.5, 139.2, 122.0, 115.3, 47.0. ESI-MS (positive ion mode, CH<sub>3</sub>OH) calcd *m/z*: 278.1406; found at *m/z*, 278.1402, which are assigned as [L<sub>1</sub>H]<sup>+</sup>.

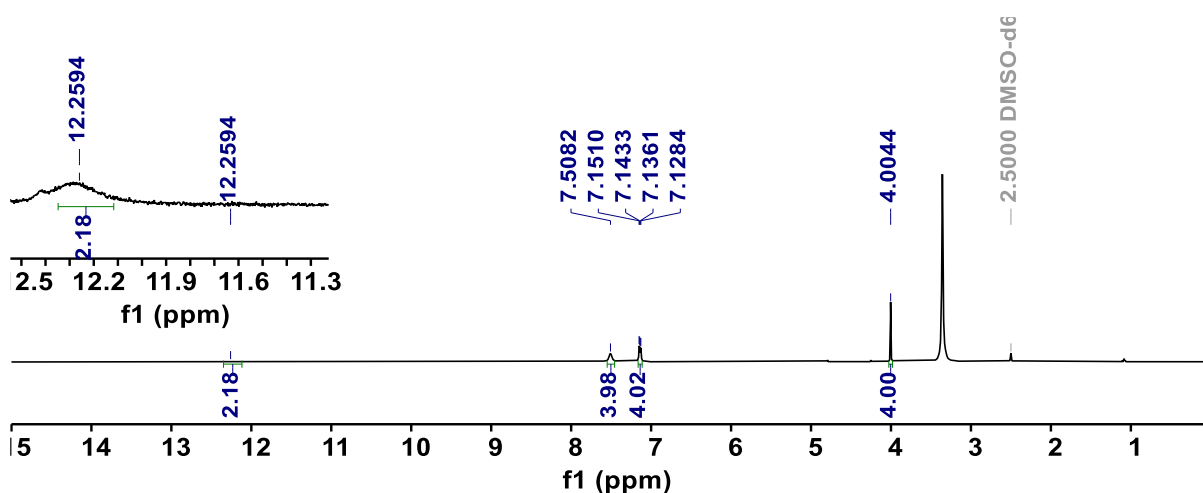

Fig. S1 <sup>1</sup>H NMR spectrum (400 MHz, DMSO-*d*<sub>6</sub>) of ligand L<sub>1</sub>.

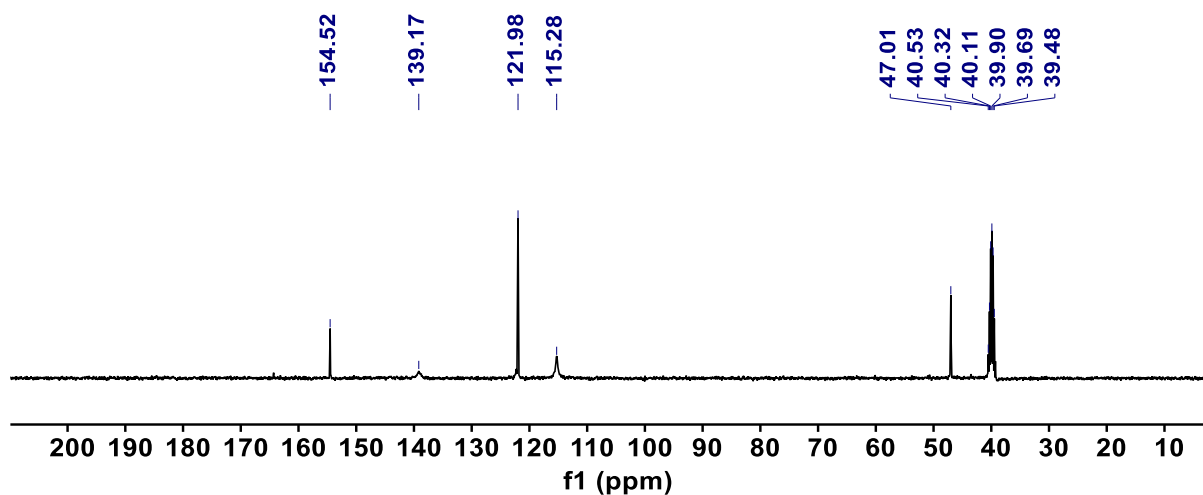

Fig. S2 <sup>13</sup>C NMR spectrum (100 MHz, DMSO-*d*<sub>6</sub>) of ligand L<sub>1</sub>.

## Synthesis of ligand tris((1H-benzoimidazol-2-yl)methyl)amine (L<sub>2</sub>)

The ligand (L<sub>2</sub> = tris(2-benzimidazolylmethyl)amine) was synthesized following the methods reported earlier.<sup>4</sup> Aminotriacetic acid (0.9557 g, 5 mmol) and *o*-phenylenediamine (1.622 g, 15 mmol) were refluxed in 30 mL ethylene glycol at 180 °C for 8 h. After cooling down to room temperature, a reddish crude product was obtained by adding water. Colorless crystals of the ligand were obtained upon recrystallization from ethanol. Yield 1.46 g (72%). <sup>1</sup>H NMR (500 MHz, DMSO-*d*<sub>6</sub>) δ 12.46 (s, 3H), 7.56 (s, 6H), 7.20–7.14 (m, 6H), 4.14 (s, 6H). <sup>13</sup>C NMR (100 MHz, DMSO-*d*<sub>6</sub>) δ 152.3, 121.7, 51.5, 40.1, 39.9, 39.7, 39.5, 39.3, 39.1, 38.9. ESI-MS (positive ion mode, CH<sub>3</sub>OH) calcd *m/z*: 408.1937; found at *m/z*, 408.1934, which are assigned as [L<sub>2</sub>H]<sup>+</sup>.

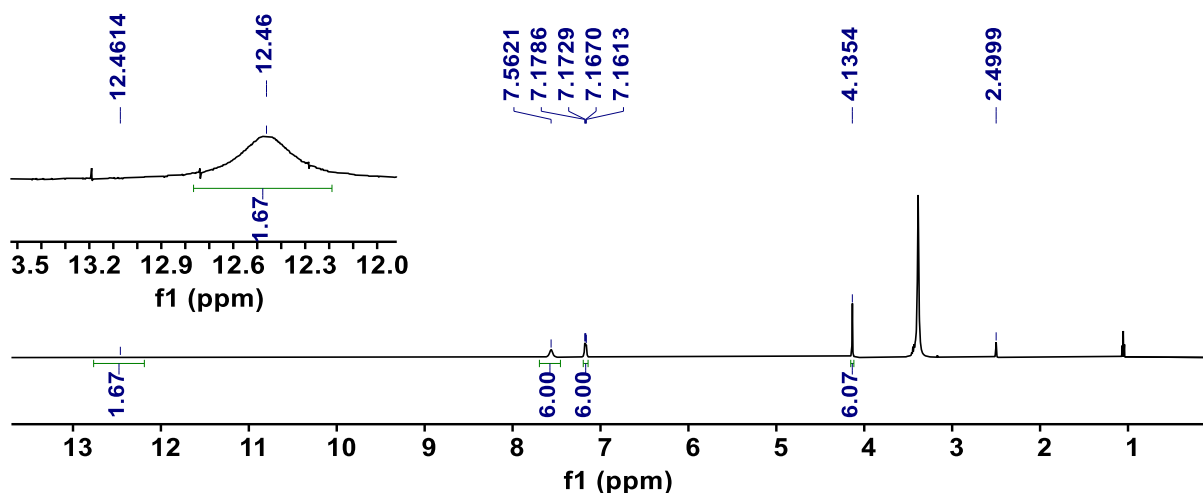

Fig. S3 <sup>1</sup>H NMR spectrum (500 MHz, DMSO-*d*<sub>6</sub>) of ligand L<sub>2</sub>.

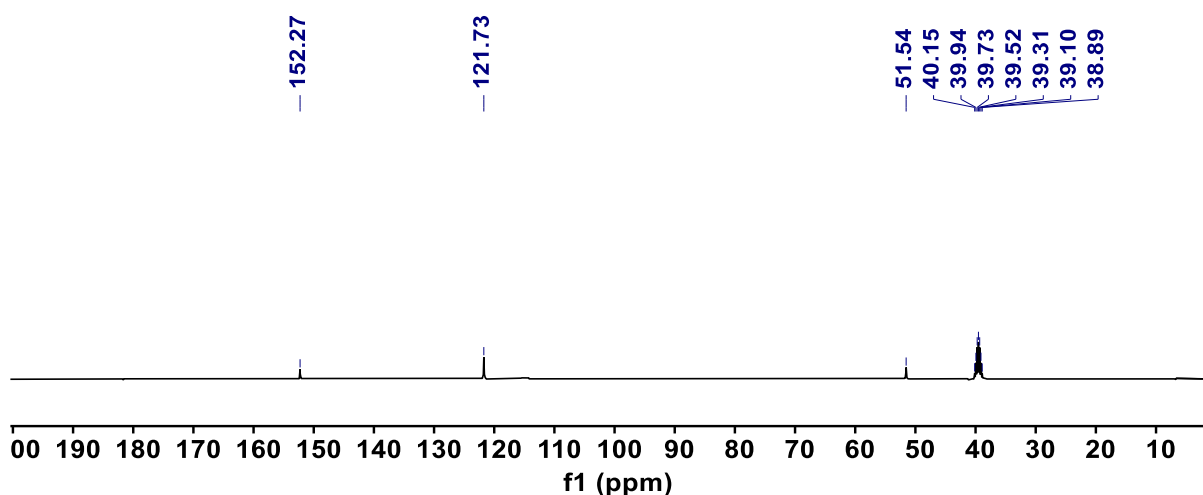

Fig. S4 <sup>13</sup>C NMR spectrum (100 MHz, DMSO-*d*<sub>6</sub>) of ligand L<sub>2</sub>.

### Synthesis of complex $[\text{NiL}_1\text{Br}]\text{Br}$ (Cat. 1)

An acetonitrile solution of ligand  $\text{L}_1$  (0.277 g, 1 mmol) was added to the solution (10 mL) of  $\text{NiBr}_2$  (0.218 g, 1 mmol) with constant stirring. A red-colored compound was obtained after removing the solvent under reduced pressure.

Cat. 1 Yield 0.382 g (77%)  $\text{C}_{16}\text{H}_{15}\text{Br}_2\text{N}_5\text{Ni}_1$  (495.83). Calculated C, 38.76; H, 3.05; N, 14.12; Found C, 38.63; H, 2.94; N, 14.21. ESI-MS (positive ion mode,  $\text{CH}_3\text{OH}$ ) calcd  $m/z$ : 415.98; found at  $m/z$ , 415.98, which are assigned as  $[\text{NiL}_1\text{Br}]^+$ .

Light green colored single crystals for X-ray diffraction were obtained by slow diffusion of diethyl ether into the DMF solution.

### Synthesis of complexes and $[\text{NiBrL}_2\text{CH}_3\text{CN}][\text{NiL}_2(\text{CH}_3\text{CN})_2]\text{Br}_3$ (Cat. 2)

Complex Cat. 2 was synthesized following the same procedure as Cat. 1, using ligand  $\text{L}_2$  (0.408 g, 1 mmol) instead of  $\text{L}_1$ . Blue crystals were obtained after slowly evaporating the solvent.

Cat. 2. Yield 0.508 g (74%)  $\text{C}_{54}\text{H}_{51}\text{Br}_4\text{N}_{17}\text{Ni}_2$  (1375.12). Calculated C, 47.17; H, 3.74; N, 17.32; Found C, 47.08; H, 3.67; N, 17.41; IR ( $\text{cm}^{-1}$ ):  $\nu_{(\text{C}=\text{N})} = 2306, 2282$ . ESI-MS (positive ion mode,  $\text{CH}_3\text{OH}$ ) calcd  $m/z$ : 546.03; found at  $m/z$ , 546.03, which are assigned as  $[\text{NiL}_2\text{Br}]^+$ .

### Synthesis of complexes $[\text{NiL}_2(\text{CH}_3\text{CN})_2]_2\text{PF}_6$ (Cat. 3) and $[\text{NiL}_2(\text{CH}_3\text{CN})_2]_2\text{BF}_4$ (Cat. 4)

Both complexes Cat. 3 and Cat. 4 were prepared similarly by dissolving Cat. 2 (0.668 g, 1 mmol) in acetonitrile solution (20 mL) and then, aqueous solution of  $\text{NH}_4\text{PF}_6$  (0.407 g, 2.5 mmol) for 3 and  $\text{NH}_4\text{BF}_4$  (0.262 g, 2.5 mmol) for 4 was added to it. The resulting solution was filtered, and the filtrate was evaporated to obtain a light blue solid. Single crystals were obtained by diffusing  $\text{Et}_2\text{O}$  into a concentrated solution of Cat. 3 and Cat. 4 in  $\text{CH}_3\text{CN}$ . ESI-MS (positive ion mode,  $\text{CH}_3\text{OH}$ ) calcd  $m/z$ : 232.56; found at  $m/z$ , 232.56, which are assigned as  $[\text{NiL}_2]^{2+}$ .

Cat. 3. Yield 0.746 g (85%)  $\text{C}_{30}\text{H}_{30}\text{F}_{12}\text{N}_{10}\text{NiP}_2$  (879.29). Calculated C, 40.98; H, 3.44; N, 15.93; Found C, 40.90; H, 3.31; N, 16.01; IR ( $\text{cm}^{-1}$ ):  $\nu_{(\text{C}=\text{N})} = 2309, 2280$ ,  $\nu_{(\text{PF}_6)} = 832$ . ESI-MS (positive ion mode,  $\text{CH}_3\text{OH}$ ) calcd  $m/z$ : 232.56; found at  $m/z$ , 232.56, which are assigned as  $[\text{NiL}_2]^{2+}$ .

Cat. 4. Yield 0.679 g (87%)  $\text{C}_{62}\text{H}_{63}\text{B}_4\text{F}_{16}\text{N}_{21}\text{Ni}_2$  (1566.93). Calculated C, 47.52; H, 4.05; N, 18.77; Found C, 47.63; H, 3.91; N, 18.63; IR ( $\text{cm}^{-1}$ ):  $\nu_{(\text{C}=\text{N})} = 2305, 2285$ ,  $\nu_{(\text{BF}_4)} = 1046$ . ESI-

MS (positive ion mode, CH<sub>3</sub>OH) calcd  $m/z$ : 232.56; found at  $m/z$ , 232.56, which are assigned as [NiL<sub>2</sub>]<sup>2+</sup>.

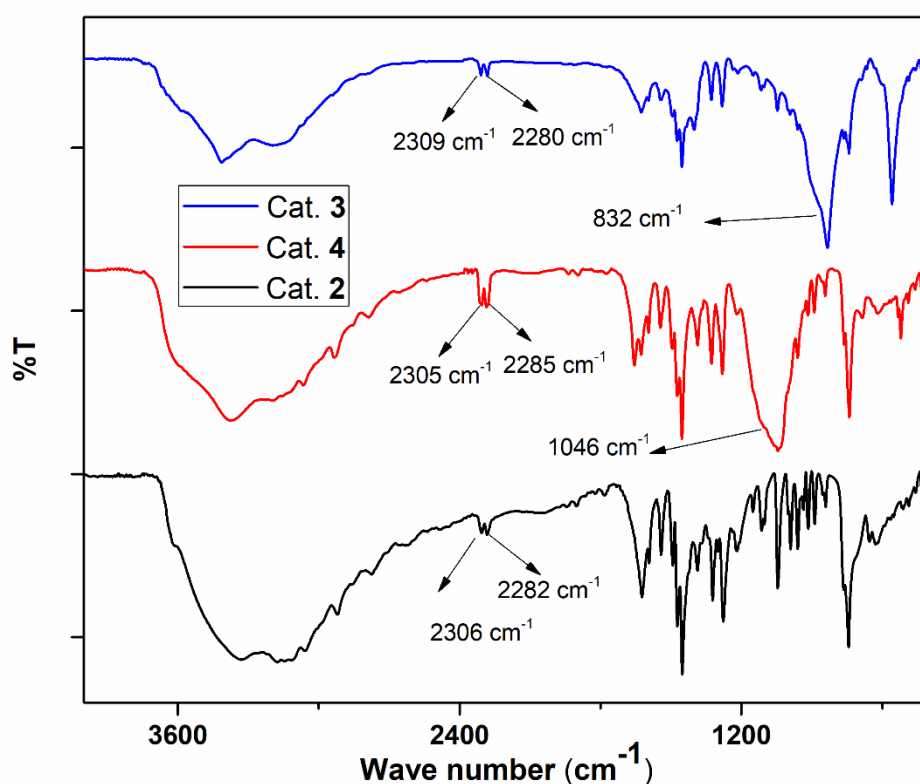

**Fig. S5** IR spectra of complexes Cat. 2–Cat. 4.

#### Synthesis of complex [CoBrL<sub>2</sub>]<sub>2</sub>Br<sub>2</sub> (Cat. 5) and [MnBrL<sub>2</sub>]Br (Cat. 6)<sup>5</sup>

Both complexes Cat. 5 and Cat. 6 were synthesized by following the same procedure as for Cat. 2, using CoBr<sub>2</sub> (0.218 g, 1 mmol) and MnBr<sub>2</sub> (0.214 g, 1 mmol) instead of NiBr<sub>2</sub>. The dark blue and white-colored compound was obtained after evaporating solvent for Cat. 5 and Cat. 6 respectively. Single crystals were obtained by diffusing Et<sub>2</sub>O into a concentrated solution of Cat. 5 CH<sub>3</sub>CN.

Cat. 5. Yield 0.451 g (72%) C<sub>24</sub>H<sub>21</sub>BrCoN<sub>7</sub> (626.22). Calculated C, 46.03; H, 3.38; N, 15.66; Found C, 45.90; H, 3.21; N, 15.75; ESI-MS (positive ion mode, CH<sub>3</sub>OH) calcd  $m/z$ : 547.03; found at  $m/z$ , 547.03, which are assigned as [CoL<sub>2</sub>Br]<sup>+</sup>.

Cat. 6. Yield 0.746 g (75%) C<sub>24</sub>H<sub>21</sub>BrMnN<sub>7</sub> (622.23). Calculated C, 46.33; H, 3.40; N, 15.76; Found C, 46.22; H, 3.30; N, 15.70; ESI-MS (positive ion mode, CH<sub>3</sub>OH) calcd  $m/z$ : 541.04; found at  $m/z$ , 541.04, which are assigned as [MnL<sub>2</sub>Br]<sup>+</sup>.



## 7. X-ray Crystallographic data collection and refinement

Suitable single crystals of complex Cat. **1**(DMF)<sub>2</sub>–Cat. **5** was mounted on a Bruker-AXS SMART APEX II diffractometer equipped with a graphite monochromator and Mo-K $\alpha$  ( $\lambda = 0.71073\text{\AA}$ ) radiation. The structure was solved by direct methods and refined by full-matrix least-squares on  $F^2$  using the SHELXL2018/3 package and OLEX2 program.<sup>6-8</sup> Absorption corrections were carried out using the SADABS program.<sup>9</sup> All other hydrogen atoms were placed in geometrically idealized positions and constrained to ride on their parent atoms. Successful convergence was indicated by the maximum shift/error of 0.001 for the last cycle of the least squares refinement. Data collection, structure refinement parameters, and crystallographic data for complexes Cat. **1**(DMF)<sub>2</sub>–Cat. **5** is given in Table S1. The CCDC numbers of Cat. **1**(DMF)<sub>2</sub>–Cat. **5** are 2400610-2400614.

**Table S1** Crystallographic data and structure refinement of complexes Cat. **1**(DMF)<sub>2</sub>–Cat. **5**

| Complex                             | Cat. <b>1</b> (DMF) <sub>2</sub>                                                    | Cat. <b>2</b>                                                                   | Cat. <b>3</b>                                                                                  | Cat. <b>4</b>                                                                                      | Cat. <b>5</b>                                                    |
|-------------------------------------|-------------------------------------------------------------------------------------|---------------------------------------------------------------------------------|------------------------------------------------------------------------------------------------|----------------------------------------------------------------------------------------------------|------------------------------------------------------------------|
| Chemical formula                    | C <sub>22</sub> H <sub>31</sub> Br <sub>2</sub> N <sub>7</sub> Ni<br>O <sub>3</sub> | C <sub>54</sub> H <sub>51</sub> Br <sub>4</sub> N <sub>17</sub> Ni <sub>2</sub> | C <sub>30</sub> H <sub>30</sub> F <sub>12</sub> N <sub>10</sub> P <sub>2</sub> Ni <sub>2</sub> | C <sub>124</sub> H <sub>126</sub> B <sub>8</sub> F <sub>32</sub> N <sub>4</sub><br>Ni <sub>4</sub> | C <sub>24</sub> H <sub>21</sub> Br <sub>2</sub> CoN <sub>7</sub> |
| Formula weight                      | 660.03                                                                              | 1375.10                                                                         | 879.29                                                                                         | 3119.97                                                                                            | 626.21                                                           |
| Crystal system                      | Monoclinic                                                                          | Triclinic                                                                       | Triclinic                                                                                      | Orthorhombic                                                                                       | Monoclinic                                                       |
| Space group                         | <i>P</i> 2 <sub>1</sub> / <i>c</i>                                                  | <i>P</i> $\bar{1}$                                                              | <i>P</i> $\bar{1}$                                                                             | <i>F</i> dd2                                                                                       | <i>P</i> 2 <sub>1</sub> / <i>c</i>                               |
| <i>a</i> (Å)                        | 15.3924(4)                                                                          | 9.7261(4)                                                                       | 11.8948(6)                                                                                     | 73.099(3)                                                                                          | 14.0083(5)                                                       |
| <i>b</i> (Å)                        | 9.4602(2)                                                                           | 15.9789(6)                                                                      | 13.3449(7)                                                                                     | 19.0547(6)                                                                                         | 24.0679(8)                                                       |
| <i>c</i> (Å)                        | 18.6459(5)                                                                          | 19.4875(7)                                                                      | 13.5674(6)                                                                                     | 19.8088(6)                                                                                         | 17.5113(6)                                                       |
| $\alpha$ (°)                        | 90                                                                                  | 88.756(1)                                                                       | 85.767(2)                                                                                      | 90                                                                                                 | 90                                                               |
| $\beta$ (°)                         | 91.876(1)                                                                           | 86.997(1)                                                                       | 66.498(2)                                                                                      | 90                                                                                                 | 90.476(1)                                                        |
| $\gamma$ (°)                        | 90                                                                                  | 81.808(1)                                                                       | 81.303(2)                                                                                      | 90                                                                                                 | 90                                                               |
| <i>V</i> (Å) <sup>3</sup>           | 2713.67(12)                                                                         | 2993.3(2)                                                                       | 1952.04(17)                                                                                    | 27591.3(17)                                                                                        | 5903.7(4)                                                        |
| <i>Z</i>                            | 4                                                                                   | 2                                                                               | 2                                                                                              | 8                                                                                                  | 8                                                                |
| $\rho_{calc}$ (g cm <sup>-3</sup> ) | 1.615                                                                               | 1.526                                                                           | 1.496                                                                                          | 1.502                                                                                              | 1.409                                                            |

|                                                                                                    |                |                |                |                |                |
|----------------------------------------------------------------------------------------------------|----------------|----------------|----------------|----------------|----------------|
| <i>T</i> (K)                                                                                       | 296            | 296            | 296            | 296            | 296            |
| $\mu$ (Mo $K\alpha$ )<br>(mm <sup>-1</sup> )                                                       | 3.696          | 3.349          | 0.673          | 0.646          | 3.311          |
| <i>F</i> (000)                                                                                     | 1336           | 1380           | 892            | 12776          | 2488           |
| R(int)                                                                                             | 0.042          | 0.043          | 0.051          | 0.062          | 0.062          |
| Total reflections                                                                                  | 45101          | 50926          | 52816          | 116287         | 98104          |
| Unique reflections                                                                                 | 6775           | 14541          | 9731           | 16061          | 14749          |
| Reflections with <i>I</i> > 2 $\sigma$ ( <i>I</i> )                                                | 5946           | 11371          | 8380           | 14088          | 11603          |
| [ <i>I</i> > 2 $\sigma$ ( <i>I</i> )]R <sub>1</sub> <sup>a</sup> ,<br>wR <sub>2</sub> <sup>b</sup> | 0.0264, 0.0601 | 0.1022, 0.3211 | 0.0330, 0.0855 | 0.0688, 0.1798 | 0.0507, 0.1317 |
| R(all data)                                                                                        | 0.0330         | 0.1208         | 0.0403         | 0.0794         | 0.0658         |
| GOF <sup>c</sup> on F <sup>2</sup>                                                                 | 1.05           | 1.09           | 1.03           | 1.06           | 1.01           |
| Residual electron Density, e/Å <sup>-3</sup>                                                       | -1.14, 0.76    | -5.80, 5.43    | -0.44, 0.41    | -0.77, 1.95    | -2.81, 1.29    |

<sup>a</sup>R<sub>1</sub> =  $\sum||F_o| - |F_c|| / \sum|F_o|$ , <sup>b</sup>wR<sub>2</sub> (F<sub>o</sub><sup>2</sup>) =  $\sum[w(F_o^2 - F_c^2)^2 / \sum w F_o^4]^{1/2}$  and <sup>c</sup>GOF =  $\sum[w(F_o^2 - F_c^2)^2 / (N_{obs} - N_{params})]^{1/2}$

## 8. Description of the Structures

In Cat. **1**(DMF)<sub>2</sub>, the metal atom is hexacoordinated with an octahedral environment. It is bonded to two benzimidazole nitrogen atoms (N2 and N4), one amine nitrogen atom N1, two oxygen atoms (O1 and O2) of solvent DMF molecules, and one non-coordinated bromine and one solvent water molecule. The structure of Cat. **1**(DMF)<sub>2</sub> is shown in Scheme 2 together with the selective atomic numbering scheme. The asymmetric unit of Cat. **2** contains two independent mononuclear Ni(II) units (A and B) and three bromine anions. The structure of Cat. **2** is shown in Scheme 2 (unit A) together with the selective atomic numbering scheme. The Ni(II) centers are six-coordinated with distorted octahedral geometry. The Ni1 atom is coordinated by three benzimidazole nitrogen atoms (N2A, N4A, and N6A), one amine nitrogen atom (N1A) from ligand **L**<sub>2</sub>, one acetonitrile molecule, and one bromide ion in unit A. In contrast, unit B has a similar coordination environment, but an acetonitrile molecule is coordinated instead of a bromide ion. The structures of Cat. **3** and Cat. **4** shares the same basic

framework as Cat. **2**, but with  $\text{PF}_6^-$  (in Cat. **3**) and  $\text{BF}_4^-$  (in Cat. **4**) anions replacing the  $\text{Br}^-$  anion (Scheme 2). In both complexes, the Ni(II) centers are six-coordinated, exhibiting a distorted octahedral geometry. The solid-state structure of Cat. **5** reveals that the asymmetric unit contains two independent cationic complexes (A and B) and two bromide ions that balance the charge. A perspective view of Cat. **5** together with the selective atomic numbering scheme is shown in Scheme 2 (unit A). Both units have an equivalent structure with slight bond length and angle differences. Co(II) center possesses a penta-coordinated distorted trigonal bipyramidal geometry ( $\tau^5 \approx 0.94$ ) being coordinated by three benzimidazole nitrogen atoms (N2A, N4A, and N6A), one amine nitrogen atom (N1A) of the ligand (**L**<sub>2</sub>) and one bromide ion (for unit A). Selected bond lengths and angles of Cat. **1**(DMF)<sub>2</sub>–Cat. **5** are given in Table S2–S6.

**Table S2** Selected bond lengths (Å) and angles (°) complex Cat. **1**(DMF)<sub>2</sub>

| Bond lengths (Å) |            |
|------------------|------------|
| Ni(1)–Br(1)      | 2.4990(4)  |
| Ni(1)–O(1)       | 2.1201(13) |
| Ni(1)–O(2)       | 2.1100(13) |
| Ni(1)–N(1)       | 2.1145(16) |
| Ni(1)–N(2)       | 2.0561(15) |
| Ni(1)–N(4)       | 2.0733(15) |
| Bond angles (°)  |            |
| Br(1)–Ni(1)–O(1) | 96.32(4)   |
| Br(1)–Ni(1)–O(2) | 97.58(4)   |
| Br(1)–Ni(1)–N(1) | 178.51(4)  |
| Br(1)–Ni(1)–N(2) | 100.03(5)  |
| Br(1)–Ni(1)–N(4) | 99.92(5)   |
| O(1)–Ni(1)–O(2)  | 166.06(6)  |

|                 |           |
|-----------------|-----------|
| O(1)–Ni(1)–N(1) | 82.21(6)  |
| O(1)–Ni(1)–N(2) | 87.84(6)  |
| O(1)–Ni(1)–N(4) | 85.91(6)  |
| O(2)–Ni(1)–N(1) | 83.90(6)  |
| O(2)–Ni(1)–N(2) | 88.60(6)  |
| O(2)–Ni(1)–N(4) | 92.84(6)  |
| N(1)–Ni(1)–N(2) | 80.18(6)  |
| N(1)–Ni(1)–N(4) | 79.77(6)  |
| N(2)–Ni(1)–N(4) | 159.62(6) |

**Table S3** Selected bond lengths (Å) and angles (°) complex Cat. 2

| Bond lengths (Å)  |           |                   |          |
|-------------------|-----------|-------------------|----------|
| Ni(1)–Br(1A)      | 2.569(16) | Ni(2)–N(1B)       | 2.172(6) |
| Ni(1)–N(1A)       | 2.224(6)  | Ni(2)–N(2B)       | 2.037(7) |
| Ni(1)–N(2A)       | 2.062(6)  | Ni(2)–N(4B)       | 2.068(6) |
| Ni(1)–N(4A)       | 2.082(6)  | Ni(2)–N(6B)       | 2.060(6) |
| Ni(1)–N(6A)       | 2.065(6)  | Ni(2)–N(8B)       | 2.050(6) |
| Ni(1)–N(8A)       | 2.137(6)  | Ni(2)–N(9B)       | 2.148(8) |
| Bond angles (°)   |           |                   |          |
| N(1A)–Ni(1)–N(2A) | 78.3(2)   | N(1B)–Ni(2)–N(2B) | 83.1(3)  |
| N(1A)–Ni(1)–N(4A) | 79.0(2)   | N(1B)–Ni(2)–N(4B) | 79.4(3)  |
| N(1A)–Ni(1)–N(6A) | 81.6(2)   | N(1B)–Ni(2)–N(6B) | 79.9(3)  |
| N(1A)–Ni(1)–N(8A) | 87.8(2)   | N(1B)–Ni(2)–N(8B) | 178.8(3) |

|                    |          |                   |          |
|--------------------|----------|-------------------|----------|
| N(2A)–Ni(1)–N(4A)  | 157.2(2) | N(1B)–Ni(2)–N(9B) | 90.8(3)  |
| N(2A)–Ni(1)–N(6A)  | 91.2(2)  | N(2B)–Ni(2)–N(4B) | 90.5(3)  |
| N(2A)–Ni(1)–N(8A)  | 87.1(2)  | N(2B)–Ni(2)–N(6B) | 89.7(3)  |
| N(4A)–Ni(1)–N(6A)  | 86.5(2)  | N(2B)–Ni(2)–N(8B) | 98.1(2)  |
| N(4A)–Ni(1)–N(8A)  | 91.1(2)  | N(2B)–Ni(2)–N(9B) | 173.5(2) |
| N(6A)–Ni(1)–N(8A)  | 169.3(2) | N(4B)–Ni(2)–N(6B) | 159.1(3) |
| Br(1A)–Ni(1)–N(1A) | 175.9(3) | N(4B)–Ni(2)–N(8B) | 100.8(2) |
| Br(1A)–Ni(1)–N(2A) | 97.6(3)  | N(4B)–Ni(2)–N(9B) | 90.8(3)  |
| Br(1A)–Ni(1)–N(4A) | 105.2(3) | N(6B)–Ni(2)–N(8B) | 99.9(2)  |
| Br(1A)–Ni(1)–N(6A) | 100.8(2) | N(6B)–Ni(2)–N(9B) | 86.9(3)  |
| Br(1A)–Ni(1)–N(8A) | 92.2(4)  | N(8B)–Ni(2)–N(9B) | 88.0(2)  |

**Table S4** Selected bond lengths (Å) and angles (°) complex Cat. **3**

| Bond lengths (Å) |            |
|------------------|------------|
| Ni(1)–N(1)       | 2.1928(15) |
| Ni(1)–N(2)       | 2.0588(13) |
| Ni(1)–N(4)       | 2.0797(13) |
| Ni(1)–N(6)       | 2.0514(13) |
| Ni(1)–N(8)       | 2.0424(16) |
| Ni(1)–N(9)       | 2.1163(15) |
| Bond angles (°)  |            |
| N(1)–Ni(1)–N(2)  | 80.92(5)   |
| N(1)–Ni(1)–N(4)  | 78.77(5)   |

|                 |           |
|-----------------|-----------|
| N(1)–Ni(1)–N(6) | 81.65(5)  |
| N(1)–Ni(1)–N(8) | 177.18(5) |
| N(1)–Ni(1)–N(9) | 92.82(6)  |
| N(2)–Ni(1)–N(4) | 158.86(6) |
| N(2)–Ni(1)–N(6) | 87.43(5)  |
| N(2)–Ni(1)–N(8) | 101.90(6) |
| N(2)–Ni(1)–N(9) | 88.20(5)  |
| N(4)–Ni(1)–N(6) | 95.36(5)  |
| N(4)–Ni(1)–N(8) | 98.42(6)  |
| N(4)–Ni(1)–N(9) | 86.99(5)  |
| N(6)–Ni(1)–N(8) | 98.46(6)  |
| N(6)–Ni(1)–N(9) | 173.43(6) |
| N(8)–Ni(1)–N(9) | 87.24(6)  |

**Table S5** Selected bond lengths (Å) and angles (°) complex Cat. **4**

| Bond lengths (Å) |          |             |          |
|------------------|----------|-------------|----------|
| Ni(1)–N(1A)      | 2.180(5) | Ni(2)–N(1B) | 2.192(5) |
| Ni(1)–N(2A)      | 2.064(6) | Ni(2)–N(2B) | 2.080(6) |
| Ni(1)–N(4A)      | 2.059(6) | Ni(2)–N(4B) | 2.037(6) |
| Ni(1)–N(6A)      | 2.050(6) | Ni(2)–N(6B) | 2.070(6) |
| Ni(1)–N(8A)      | 2.047(6) | Ni(2)–N(8B) | 2.063(6) |
| Ni(1)–N(9A)      | 2.130(6) | Ni(2)–N(9B) | 2.133(6) |
| Bond angles (°)  |          |             |          |

|                   |          |                   |          |
|-------------------|----------|-------------------|----------|
| N(1A)–Ni(1)–N(2A) | 80.7(2)  | N(1B)–Ni(2)–N(2B) | 78.2(2)  |
| N(1A)–Ni(1)–N(4A) | 78.6(2)  | N(1B)–Ni(2)–N(4B) | 81.6(2)  |
| N(1A)–Ni(1)–N(6A) | 82.5(2)  | N(1B)–Ni(2)–N(6B) | 81.2(2)  |
| N(1A)–Ni(1)–N(8A) | 178.5(2) | N(1B)–Ni(2)–N(8B) | 177.7(2) |
| N(1A)–Ni(1)–N(9A) | 92.1(2)  | N(1B)–Ni(2)–N(9B) | 93.7(2)  |
| N(2A)–Ni(1)–N(4A) | 158.8(2) | N(2B)–Ni(2)–N(4B) | 92.7(2)  |
| N(2A)–Ni(1)–N(6A) | 90.4(2)  | N(2B)–Ni(2)–N(6B) | 158.5(2) |
| N(2A)–Ni(1)–N(8A) | 100.8(2) | N(2B)–Ni(2)–N(8B) | 100.4(2) |
| N(2A)–Ni(1)–N(9A) | 90.1(2)  | N(2B)–Ni(2)–N(9B) | 86.9(2)  |
| N(4A)–Ni(1)–N(6A) | 91.0(2)  | N(4B)–Ni(2)–N(6B) | 90.4(2)  |
| N(4A)–Ni(1)–N(8A) | 100.0(2) | N(4B)–Ni(2)–N(8B) | 96.6(2)  |
| N(4A)–Ni(1)–N(9A) | 86.4(2)  | N(4B)–Ni(2)–N(9B) | 175.2(2) |
| N(6A)–Ni(1)–N(8A) | 97.7(2)  | N(6B)–Ni(2)–N(8B) | 100.3(2) |
| N(6A)–Ni(1)–N(9A) | 174.4(2) | N(6B)–Ni(2)–N(9B) | 88.2(2)  |
| N(8A)–Ni(1)–N(9A) | 87.7(2)  | N(8B)–Ni(2)–N(9B) | 88.2(2)  |

**Table S6** Selected bond lengths (Å) and angles (°) complex Cat. **5**

| Bond lengths (Å) |           |              |           |
|------------------|-----------|--------------|-----------|
| Co(1)–N(1A)      | 2.339(3)  | Co(2)–N(1B)  | 2.346(3)  |
| Co(1)–Br(1A)     | 2.4451(6) | Co(2)–Br(1B) | 2.4659(6) |
| Co(1)–N(2A)      | 2.054(3)  | Co(2)–N(2B)  | 2.051(3)  |
| Co(1)–N(4A)      | 2.061(3)  | Co(2)–N(4B)  | 2.045(3)  |
| Co(1)–N(6A)      | 2.047(3)  | Co(2)–N(6B)  | 2.057(3)  |

| Bond angles (°)    |            |                    |            |
|--------------------|------------|--------------------|------------|
| Br(1A)–Co(1)–N(1A) | 177.89(8)  | Br(1B)–Co(2)–N(1B) | 177.96(7)  |
| Br(1A)–Co(1)–N(2A) | 105.50(9)  | Br(1B)–Co(2)–N(2B) | 103.40(9)  |
| Br(1A)–Co(1)–N(4A) | 101.86(9)  | Br(1B)–Co(2)–N(4B) | 105.74(9)  |
| Br(1A)–Co(1)–N(6A) | 104.53(10) | Br(1B)–Co(2)–N(6B) | 102.29(8)  |
| N(1A)–Co(1)–N(2A)  | 75.73(11)  | N(1B)–Co(2)–N(2B)  | 76.98(11)  |
| N(1A)–Co(1)–N(4A)  | 76.04(12)  | N(1B)–Co(2)–N(4B)  | 75.93(11)  |
| N(1A)–Co(1)–N(6A)  | 76.61(12)  | N(1B)–Co(2)–N(6B)  | 75.88(11)  |
| N(2A)–Co(1)–N(4A)  | 115.03(12) | N(2B)–Co(2)–N(4B)  | 109.34(12) |
| N(2A)–Co(1)–N(6A)  | 106.71(13) | N(2B)–Co(2)–N(6B)  | 121.17(12) |
| N(4A)–Co(1)–N(6A)  | 121.43(12) | N(4B)–Co(2)–N(6B)  | 113.02(12) |

## 9. Control Experiments

### 9.1 Determination of the dehydrogenation product of ammonia-borane

#### Dehydrogenation product of AB using Cat. 4

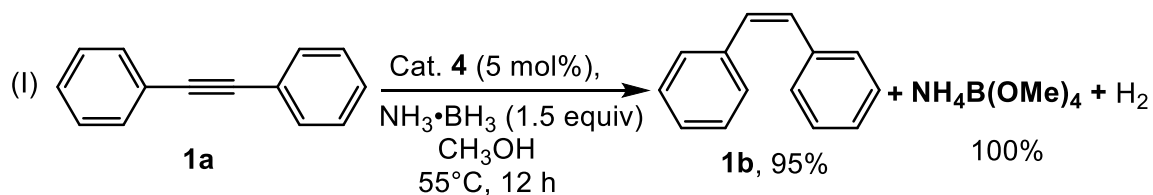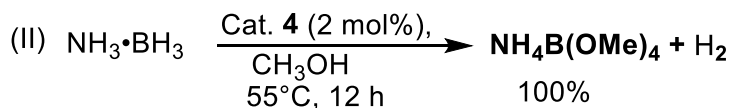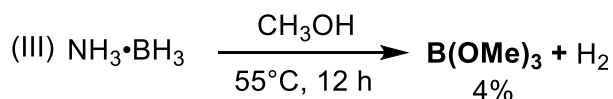

An oven-dried 4 mL screw cap vial was taken and charged with a magnetic stir-bar, alkyne **1a** (36.58 mg, 0.20 mmol), Cat. **4** (5 mol%), and AB (9.2 mg, 0.3 mmol), followed by the addition of methanol (1 mL). Then, the vial was sealed and placed in a preheated oil bath at 55 °C (oil bath temperature) for 12 h. After completion of the reaction, the tube was allowed to cool at



room temperature. After this, the solvent was removed and dissolved in THF, then submitted for  $^{11}\text{B}$  NMR which shows the complete conversion of AB into  $\text{NH}_4(\text{BOMe})_4$ .

The above experiment was carried in the absence of **1a** and 100% of  $\text{NH}_4(\text{BOMe})_4$  was observed. When the experiment was carried out without Cat. **4** then only 4% of  $\text{B}(\text{OMe})_3$  was observed.

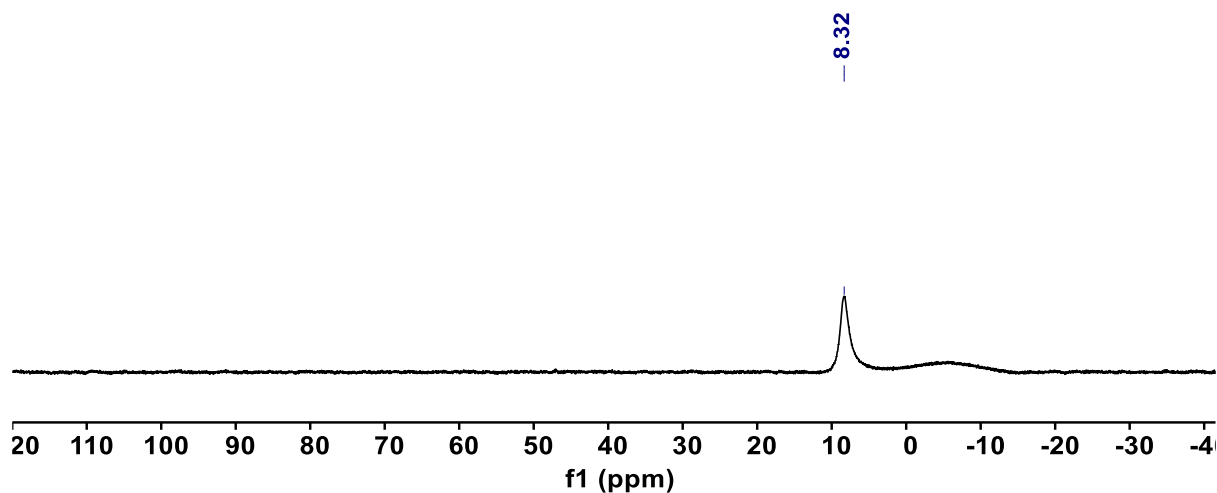

**Fig. S6**  $^{11}\text{B}$  NMR spectrum (in THF) of the reaction mixture

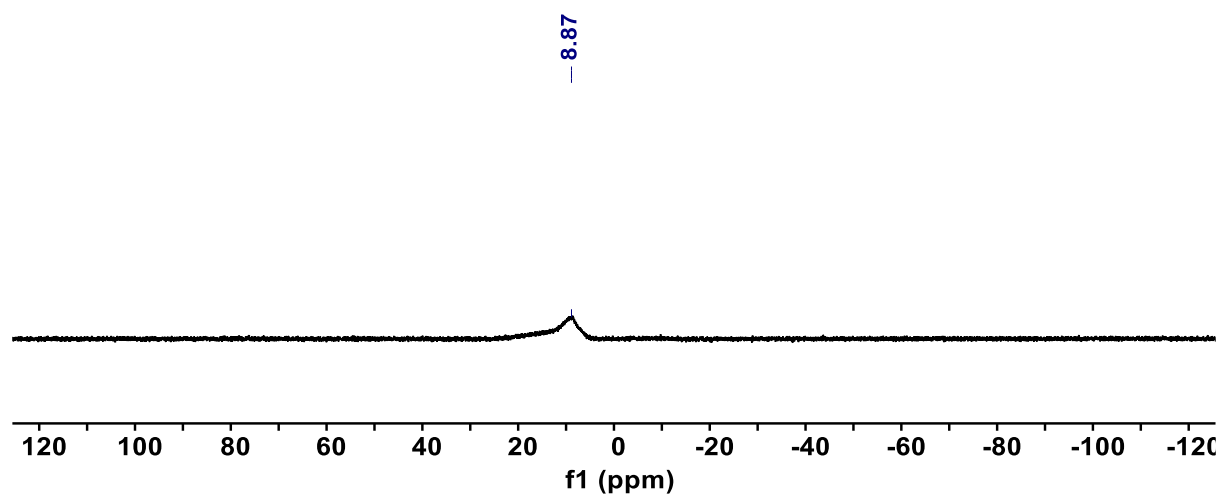

**Fig. S7**  $^{11}\text{B}$  NMR spectrum (in THF) in the absence of substrate

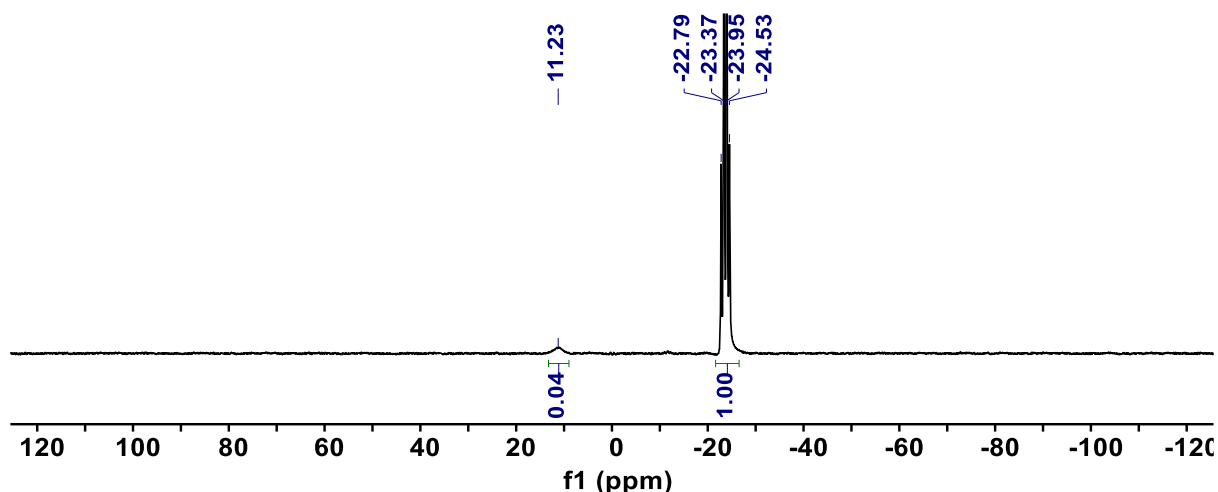

**Fig. S8**  $^{11}\text{B}$  NMR spectrum (in THF) under catalyst and substrate-free reaction condition

**Dehydrogenation product of AB using Cat. 1**

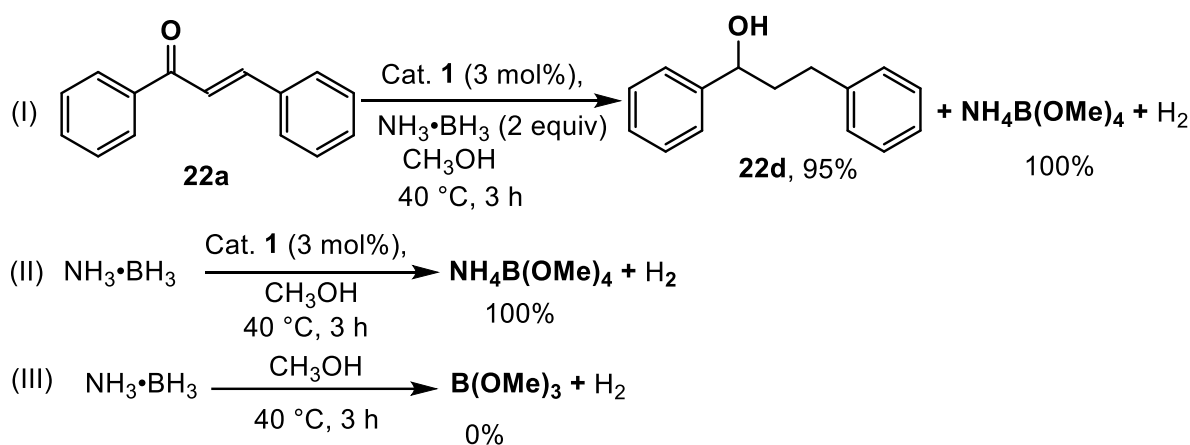

An oven-dried 4 mL screw cap vial was taken and charged with a magnetic stir-bar, alkyne **22a** (41.6 mg, 0.20 mmol), Cat. **1** (3 mol%), and AB (12.4 mg, 0.4 mmol), followed by the addition of methanol (1 mL). Then, the vial was sealed and placed in a preheated oil bath at 40 °C (oil bath temperature) for 3 h. After completion of the reaction, the tube was allowed to cool at room temperature. After this, the solvent was removed and dissolved in THF, then submitted for  $^{11}\text{B}$  NMR which shows the complete conversion of AB into  $\text{NH}_4(\text{BOMe})_4$ .

The above experiment was carried out under identical conditions in the absence of **22a** and 100% of  $\text{NH}_4(\text{BOMe})_4$  was observed. When the experiment was carried out without Cat. **1** then no conversion was observed.

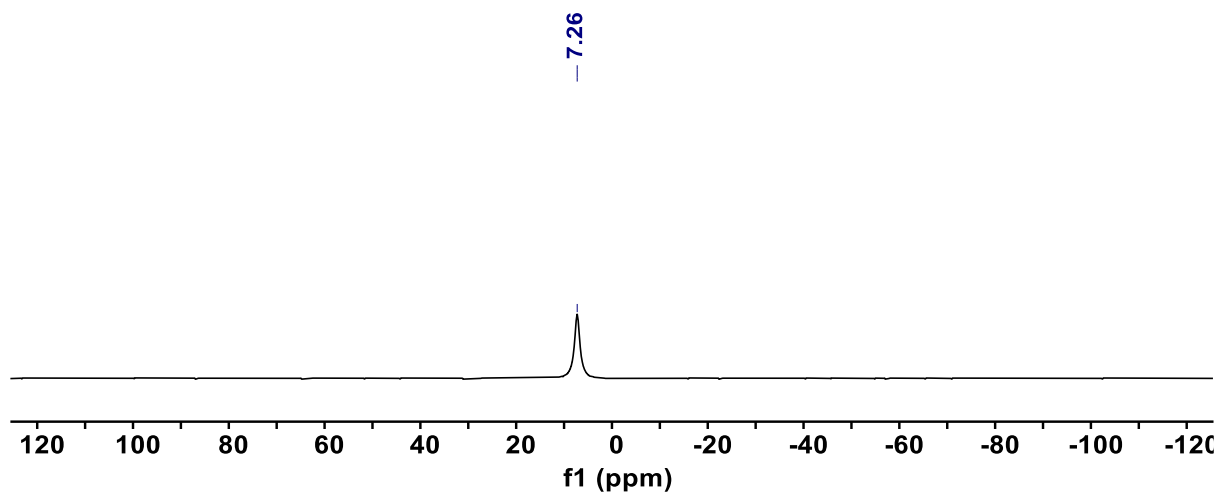

**Fig. S9**  $^{11}\text{B}$  NMR spectrum (in THF) of the reaction mixture

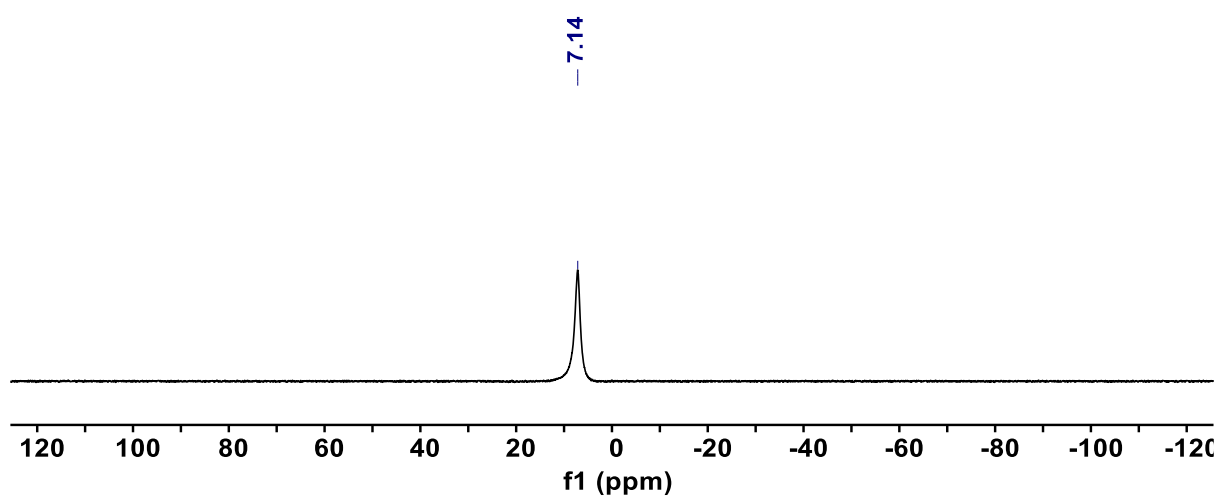

**Fig. S10**  $^{11}\text{B}$  NMR spectrum (in THF) in the absence of substrate

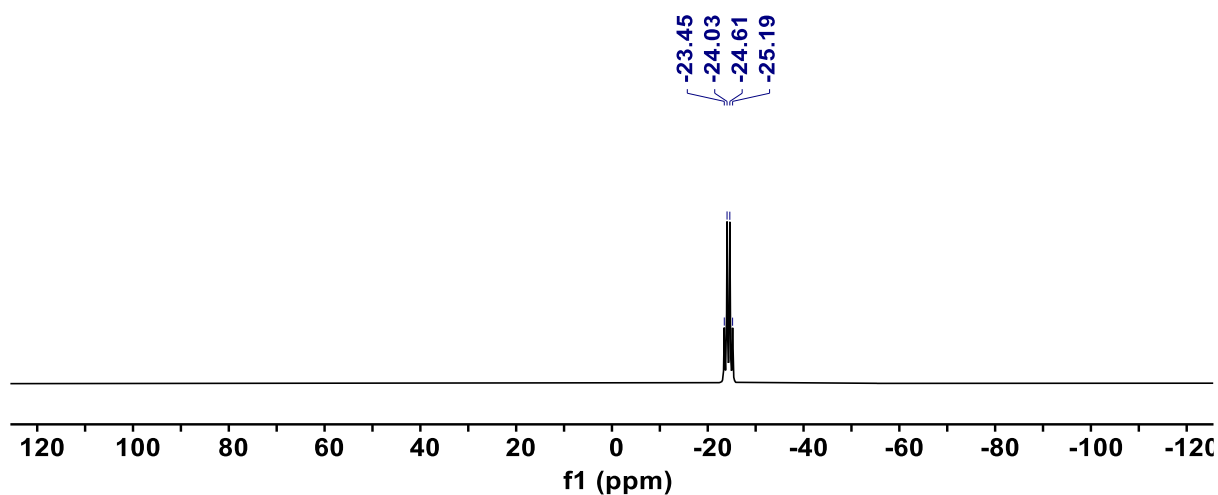

**Fig. S11**  $^{11}\text{B}$  NMR spectrum (in THF) under catalyst and substrate-free reaction condition

### 9.2 Procedure for Rate of Reaction (Electronic Effect).

An oven-dried 4 mL screw cap vial was taken and charged with a magnetic stir-bar, 1-methoxy-4-(phenylethynyl)benzene (**3a**, 48.4 mg, 0.2 mmol) or 1-(phenylethynyl)-4-

(trifluoromethyl)benzene (**4a**, 49.2 mg, 0.2 mmol), Cat. **4** (5 mol%), and AB (9.2 mg, 0.3 mmol), followed by the addition of methanol (1 mL). Then, the vial was sealed and placed in a preheated oil bath at 55 °C (oil bath temperature). The reaction vessel was taken at regular intervals (5, 10, 20, 30, and 40 min), and an aliquot of sample was withdrawn to the GC vial. The sample was diluted with MeOH and subjected to GC analysis. The data of the concentration of the product **3b** or **4b** versus time (min) plot was drawn (Figure S12) with Origin Pro 9.1, and the rate was determined by the initial rate method (up to 40 min). The initial rate obtained for the transfer hydrogenation of 1-methoxy-4(phenylethynyl)benzene (**3a**) was  $9.48 \times 10^{-4} \text{ Mmin}^{-1}$ . Similarly, the rate for the transfer hydrogenation of 1-(phenylethynyl)-4-(trifluoromethyl)benzene (**4a**) was  $8.06 \times 10^{-4} \text{ Mmin}^{-1}$ . Therefore, the rate (4-OMe)/ rate (4-CF<sub>3</sub>) =  $9.48 \times 10^{-4} / 8.06 \times 10^{-4} = 1.18$ .

**Table S7** Time-dependent formation of product **3b** or **4b** from **3a** and **4a**.

| Time(min) | 3b[M]   | 4b[M]   |
|-----------|---------|---------|
| 5         | 0.02538 | 0.01316 |
| 10        | 0.03054 | 0.01722 |
| 20        | 0.04084 | 0.02804 |
| 30        | 0.05004 | 0.0344  |
| 40        | 0.05842 | 0.04106 |

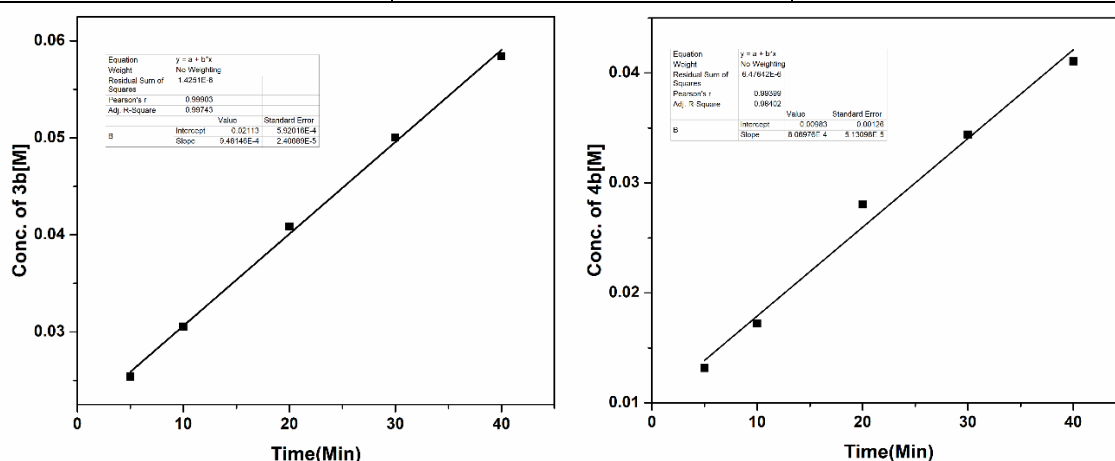

**Fig. S12** Time-dependent formation of products **3b** and **4b**.

### 9.3 Procedure for Competition Experiment

#### Competitive experiment

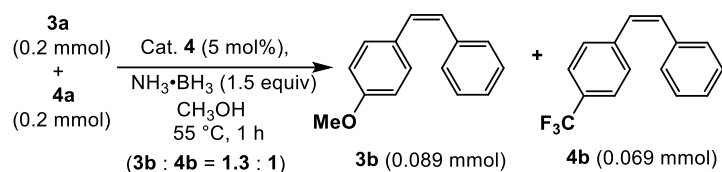

An oven-dried 4 mL screw cap vial was taken and charged with a magnetic stir-bar, 1-methoxy-4-(phenylethynyl)benzene (**3a**, 48.4 mg, 0.2 mmol) and 1-(phenylethynyl)-4-(trifluoromethyl)benzene (**4a**, 49.2 mg, 0.2 mmol), Cat. **4** (5 mol%), and AB (9.2 mg, 0.3 mmol), followed by the addition of methanol (1 mL). Then, the vial was sealed and placed in a preheated oil bath at  $55^\circ\text{C}$  (oil bath temperature) for 1 h. The yields of alkenes (**3b** (0.0899 mmol) and **4b** (0.0689 mmol)) were determined by GC.

#### 9.4 Isomerisation experiment

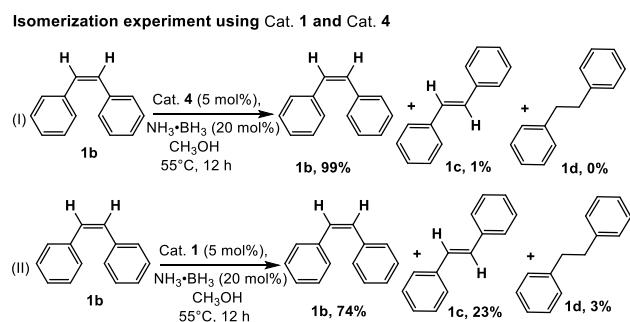

An oven-dried 4 mL screw cap vial was taken and charged with a magnetic stir-bar, 1-methoxy-(*Z*)-1,2-diphenylethene (**1a**, 36 mg, 0.2 mmol), Cat. **4** (5 mol%) or Cat. **1** (5 mol%), and AB (20 mol%), followed by the addition of methanol (1 mL). Then, the vial was sealed and placed in a preheated oil bath at  $55^\circ\text{C}$  (oil bath temperature) for 12 h. Product yields were determined by GC.

#### 9.5 Procedure for Deuterium Labelling Experiment.

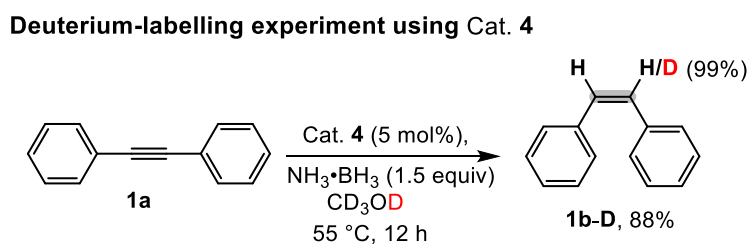

An oven-dried 4 mL screw cap vial was taken and charged with a magnetic stir-bar, alkyne (**1a**, 89.0 mg, 0.5 mmol), Cat. **4** (5 mol%), and AB (23.1 mg, 0.75 mmol), followed by the

addition of CD<sub>3</sub>OD (2 mL). Then, the vial was sealed and placed in a preheated oil bath at 55 °C (oil bath temperature) for 12h. The crude reaction mixture was then purified by flash chromatography using petroleum ether as eluent to obtain deuterated Z-stilbene **1b-D** (79.2 mg, 86%). <sup>1</sup>H NMR (400 MHz, CDCl<sub>3</sub>) δ 7.28–7.16 (m, 10H), 6.60 (s, 1H).

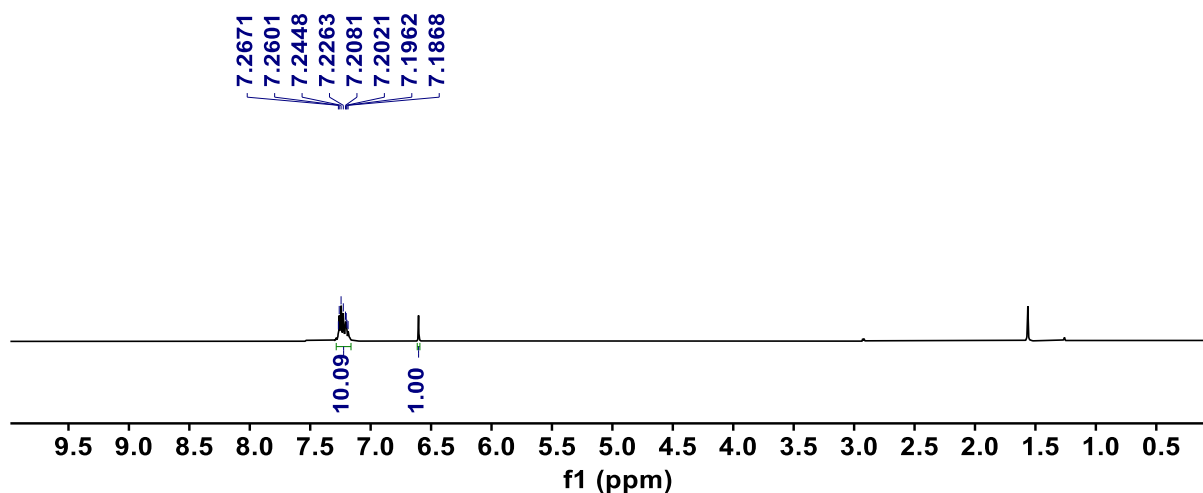

**Fig. S13** <sup>1</sup>H NMR spectrum (in CDCl<sub>3</sub>) for the reaction of alkyne and AB (1.5 equiv) in under standard reaction conditions.

#### Deuterium-labelling experiment using Cat. 1

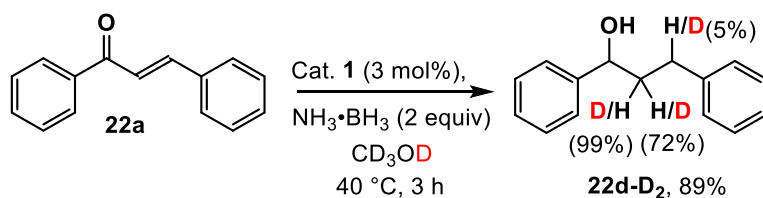

An oven-dried 4 mL screw cap vial was taken and charged with a magnetic stir-bar, chalcone **22a** (41.6 mg, 0.20 mmol), Cat. **1** (3 mol%), and AB (2 equiv), followed by the addition of CD<sub>3</sub>OD (1 mL). Then, the tube was sealed and placed in a preheated oil bath at 40 °C (oil bath temperature) for 3 h. After completion of the reaction, the tube was allowed to cool at room temperature. Then, the reaction mixture was subjected to <sup>1</sup>H and <sup>2</sup>H NMR analysis.

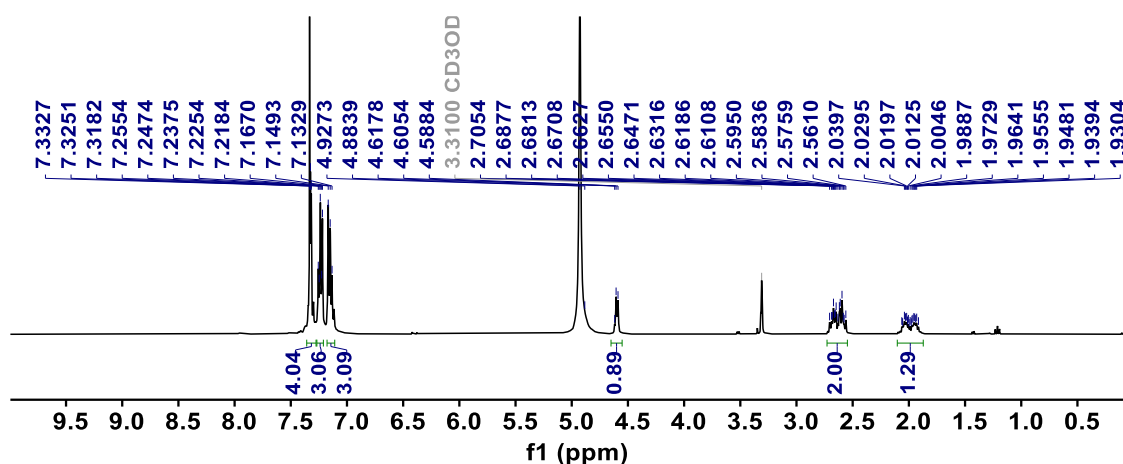

**Fig. S14**  $^1\text{H}$  NMR spectrum (in  $\text{CD}_3\text{OD}$ ) for the reaction of chalcone and AB (2 equiv) in  $\text{CD}_3\text{OD}$  under standard reaction conditions.

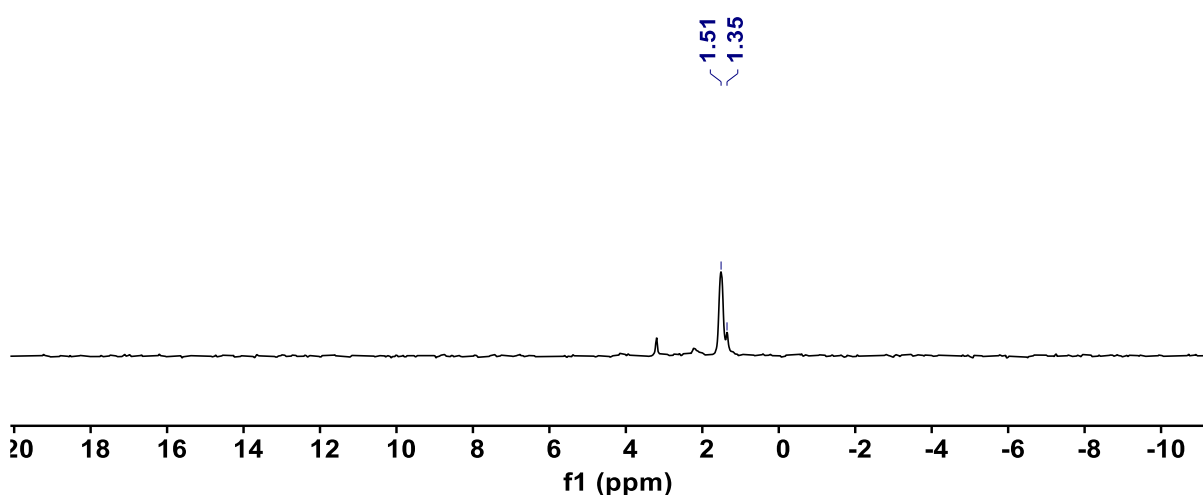

**Fig. S15**  $^2\text{H}$  NMR spectrum (in THF) for the reaction of chalcone and AB (2 equiv) under standard reaction conditions.

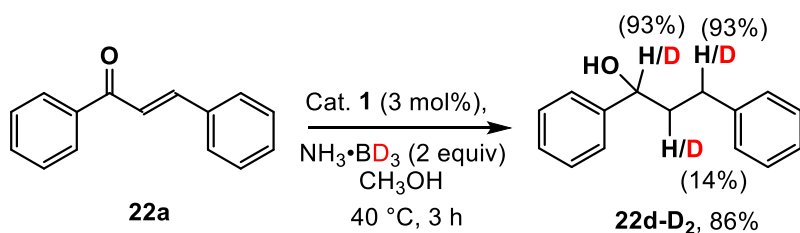

An oven-dried 4 mL screw cap vial was taken and charged with a magnetic stir-bar, chalcone **22a** (41.6 mg, 0.20 mmol), Cat. **1** (3 mol%), and  $\text{NH}_3\cdot\text{BD}_3$  (2 equiv), followed by the addition of  $\text{CH}_3\text{OH}$  (1 mL). Then, the tube was sealed and placed in a preheated oil bath at 40  $^\circ\text{C}$  (oil bath temperature) for 3 h. After completion of the reaction, the tube was allowed to cool at room temperature. Then, the reaction mixture was subjected to  $^1\text{H}$  and  $^2\text{H}$  NMR analysis.

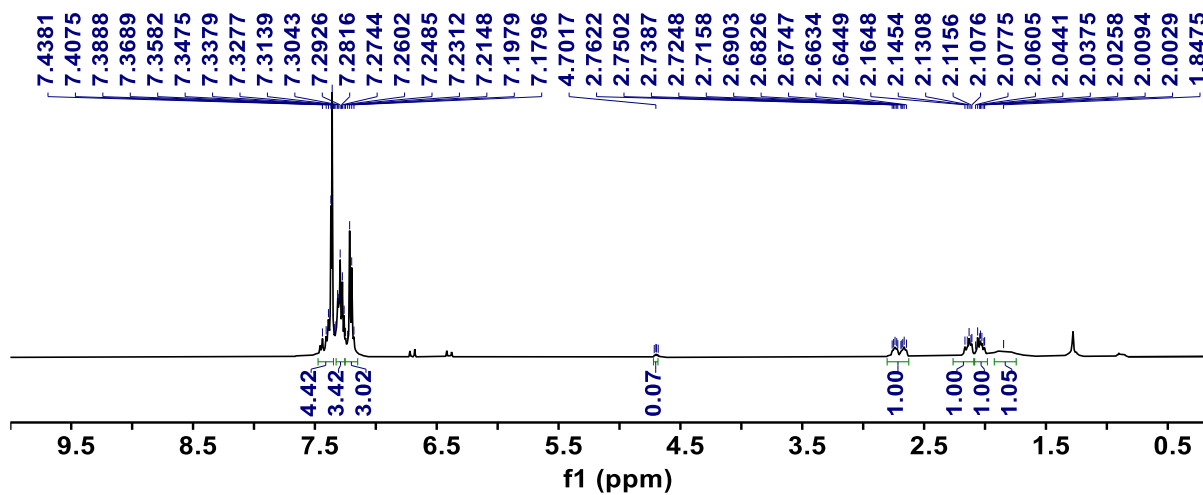

**Fig. S16**  $^1\text{H}$  NMR spectrum (in  $\text{CDCl}_3$ ) for the reaction of chalcone and  $\text{NH}_3 \cdot \text{BD}_3$  (2 equiv) in  $\text{CH}_3\text{OH}$  under standard reaction conditions.

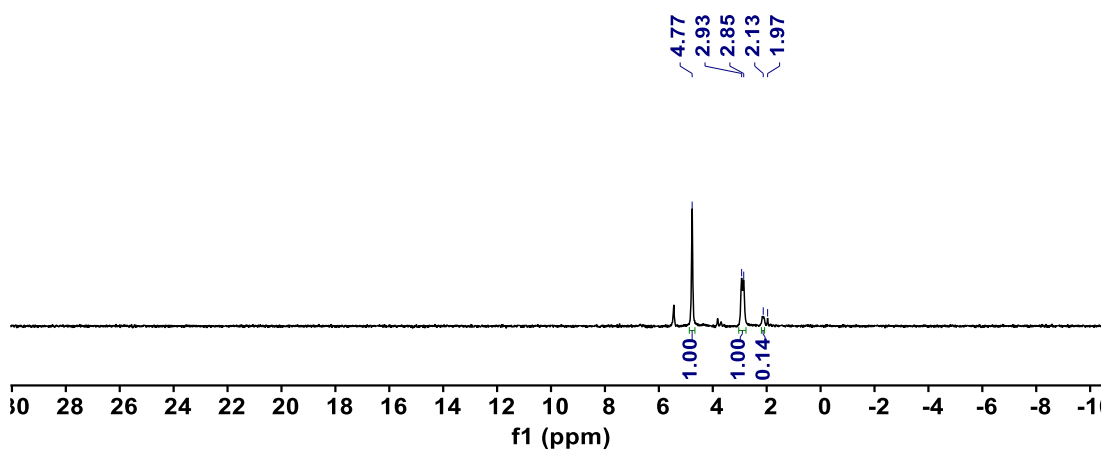

**Fig. S17**  $^2\text{H}$  NMR spectrum (in THF) for the reaction of chalcone and  $\text{NH}_3 \cdot \text{BD}_3$  (2 equiv) in  $\text{CH}_3\text{OH}$  under standard reaction conditions.

## 9.6 Procedure for time-dependent product distribution study



### Time-dependent product distribution study

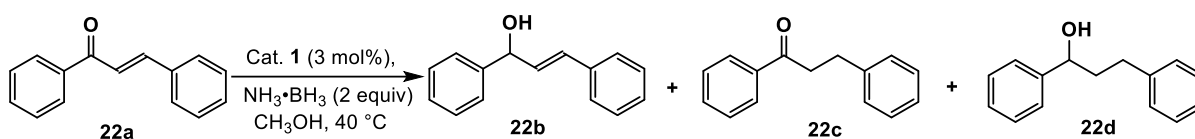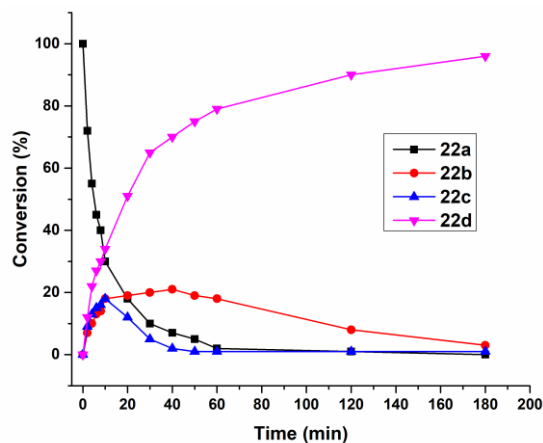

An oven-dried 4 mL screw cap vial was taken and charged with a magnetic stir-bar, chalcone **22a** (41.6 mg, 0.20 mmol), Cat. **1** (3 mol%), and AB (2 equiv), followed by the addition of  $\text{CH}_3\text{OH}$  (1 mL). Then, the tube was sealed and placed in a preheated oil bath at  $40^\circ\text{C}$  (oil bath temperature) for 2-180 Min. After completion of the reaction, the tube was allowed to cool at room temperature. Then, the reaction mixture was subjected to  $^1\text{H}$  NMR analysis.

### 9.7 Procedure for the validation of possible intermediates

The intermediates **22b** and **22c** were synthesized according to procedures reported in the literature.<sup>2</sup> Each of them was independently subjected under standard reaction conditions. An oven-dried 4 mL screw cap vial was taken and charged with a magnetic stir-bar, each intermediate (0.20 mmol), Cat. **1** (3 mol%), and AB (2 equiv), followed by the addition of  $\text{CH}_3\text{OH}$  (1 mL). Then, the tube was sealed and placed in a preheated oil bath at  $40^\circ\text{C}$  (oil bath temperature) for 3 h. After completion of the reaction, the tube was allowed to cool at room temperature. Then, the reaction mixture was subjected to  $^1\text{H}$  NMR analysis.

## 10. Computational Studies:

All the calculations were performed using the Gaussian 09 package.<sup>10</sup> Full geometry optimization followed by energy calculations on the stationary points were carried out to ascertain the nature of the stationary points as minima or first order saddle point. Hybrid functional, M062X was used with the LANL2DZ basis set<sup>11</sup> for Ni and 6-31G\*\* basis set<sup>12</sup> for non-metal elements. The transition states (TS) were further confirmed by performing intrinsic reaction coordinate (IRC) calculations using the same method. The effect of solvent (methanol)

during the calculation was incorporated in the manuscript. The solvent effect was incorporated using the conductor-like polarizable continuum model (CPCM) with methanol<sup>13</sup> at 328.15 K.

**Diphenylacetylene:**

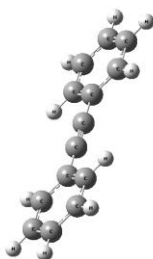

| <b>Diphenylacetylene</b>                       |                    |
|------------------------------------------------|--------------------|
| <b>SCF Done: E (RM062X)</b>                    | <b>-539.074689</b> |
| <b>SCF done for solvent</b>                    | <b>-539.235122</b> |
| <b>Thermal correction to Gibbs Free Energy</b> | <b>0.154441</b>    |
| <b>Temperature</b>                             | <b>328.15 K</b>    |

**Coordinates**

|   |          |          |          |
|---|----------|----------|----------|
| C | 0.19838  | 4.4279   | -0.7951  |
| C | 0.21946  | 3.05049  | -1.00029 |
| C | 1.4375   | 2.35896  | -0.96973 |
| C | 2.63296  | 3.07048  | -0.7724  |
| C | 2.60103  | 4.44472  | -0.56745 |
| C | 1.3824   | 5.12481  | -0.56698 |
| H | -0.74665 | 4.9604   | -0.82931 |
| H | -0.69328 | 2.49724  | -1.20554 |
| H | 3.57546  | 2.5291   | -0.78561 |
| H | 3.52784  | 4.99038  | -0.42208 |
| H | 1.36112  | 6.19797  | -0.40964 |
| C | 1.49485  | 0.92639  | -1.15095 |
| C | 1.5622   | -0.30702 | -1.31482 |
| C | 1.64046  | -1.74047 | -1.50527 |
| C | 0.61381  | -2.61842 | -1.14377 |
| C | 2.8382   | -2.24747 | -2.02978 |

|   |          |          |          |
|---|----------|----------|----------|
| C | 0.7785   | -3.98693 | -1.32134 |
| H | -0.30079 | -2.22401 | -0.711   |
| C | 2.99274  | -3.61599 | -2.20529 |
| H | 3.63768  | -1.56252 | -2.29446 |
| C | 1.96357  | -4.48792 | -1.85411 |
| H | -0.02099 | -4.66455 | -1.04098 |
| H | 3.92008  | -4.00289 | -2.61434 |
| H | 2.08736  | -5.55693 | -1.99247 |

**Ammonia-borane:**

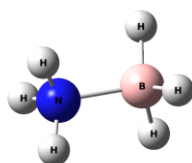

| <b>Ammonia-borane</b>                          |                   |
|------------------------------------------------|-------------------|
| <b>SCF Done: E (RM062X)</b>                    | <b>-83.116827</b> |
| <b>SCF done for solvent</b>                    | <b>-83.181686</b> |
| <b>Thermal correction to Gibbs Free Energy</b> | <b>0.047453</b>   |
| <b>Temperature</b>                             | <b>328.15 K</b>   |

**Coordinates**

|   |          |         |         |
|---|----------|---------|---------|
| B | -2.96182 | 1.4507  | 2.35068 |
| H | -2.26455 | 0.41715 | 2.31118 |
| H | -2.77905 | 1.9752  | 3.40767 |
| H | -2.88203 | 2.18717 | 1.40043 |
| N | -4.49157 | 0.87494 | 2.32621 |
| H | -5.13062 | 1.65231 | 2.49035 |
| H | -4.65776 | 0.18731 | 3.05907 |
| H | -4.73813 | 0.46438 | 1.42366 |

**Methanol:**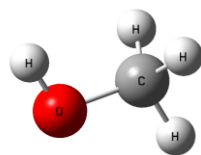

| <b>Methanol</b>                                |                    |
|------------------------------------------------|--------------------|
| <b>SCF Done: E (RM062X)</b>                    | <b>-115.632634</b> |
| <b>SCF done for solvent</b>                    | <b>-115.667286</b> |
| <b>Thermal correction to Gibbs Free Energy</b> | <b>0.029621</b>    |
| <b>Temperature</b>                             | <b>328.15 K</b>    |

**Coordinates**

|   |          |          |          |
|---|----------|----------|----------|
| C | -1.35352 | 0.97033  | 0.0      |
| H | -0.99685 | 1.47473  | 0.87365  |
| H | -0.99685 | 1.47473  | -0.87365 |
| H | -2.42352 | 0.97035  | 0.0      |
| O | -0.87687 | -0.37789 | 0.0      |
| H | -1.19522 | -0.83033 | 0.78457  |

**L<sub>2</sub>Ni-H:**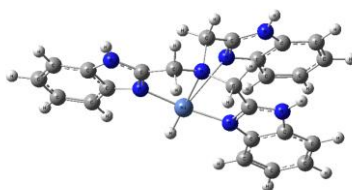

| <b>L<sub>2</sub>Ni-H:</b>                      |                     |
|------------------------------------------------|---------------------|
| <b>SCF Done: E (RM062X)</b>                    | <b>-1479.371007</b> |
| <b>SCF done for solvent</b>                    | <b>-1479.833624</b> |
| <b>Thermal correction to Gibbs Free Energy</b> | <b>0.373486</b>     |
| <b>Temperature</b>                             | <b>328.15 K</b>     |

### Coordinates

|    |         |         |         |
|----|---------|---------|---------|
| Ni | 23.16   | 11.9351 | 10.1659 |
| N  | 21.054  | 12.376  | 10.5858 |
| N  | 22.2119 | 11.0765 | 8.5257  |
| N  | 20.3427 | 10.1314 | 7.7967  |
| H  | 19.5288 | 9.8539  | 7.7828  |
| N  | 23.0795 | 13.8032 | 9.3577  |
| N  | 21.88   | 15.642  | 8.9754  |
| H  | 21.1986 | 16.1664 | 8.9388  |
| N  | 23.3771 | 12.7457 | 12.0576 |
| N  | 22.3537 | 13.6374 | 13.8087 |
| H  | 21.7154 | 13.9165 | 14.3135 |
| C  | 20.3084 | 11.2023 | 10.0965 |
| H  | 19.3761 | 11.427  | 9.9535  |
| H  | 20.3574 | 10.4766 | 10.7393 |
| C  | 20.9568 | 10.8002 | 8.801   |
| C  | 21.2652 | 9.9885  | 6.8162  |
| C  | 21.198  | 9.3444  | 5.5643  |
| H  | 20.4416 | 8.8821  | 5.2819  |
| C  | 22.3347 | 9.4492  | 4.7838  |
| H  | 22.3113 | 9.1049  | 3.9202  |
| C  | 23.4991 | 10.0361 | 5.2216  |
| H  | 24.2472 | 10.0305 | 4.6694  |
| C  | 23.581  | 10.6287 | 6.4616  |
| H  | 24.3605 | 11.0462 | 6.7502  |
| C  | 22.445  | 10.5773 | 7.2579  |
| C  | 20.6658 | 13.6012 | 9.8212  |
| H  | 20.1609 | 13.3454 | 9.0325  |
| H  | 20.1007 | 14.1635 | 10.3721 |
| C  | 21.8836 | 14.3615 | 9.4092  |
| C  | 23.168  | 15.9507 | 8.603   |
| C  | 23.7235 | 17.0997 | 8.0285  |
| H  | 23.2181 | 17.8617 | 7.8555  |
| C  | 25.0576 | 17.0311 | 7.7353  |
| H  | 25.4752 | 17.7839 | 7.3847  |
| C  | 25.8171 | 15.884  | 7.9394  |
| H  | 26.7152 | 15.884  | 7.6976  |
| C  | 25.2674 | 14.7502 | 8.4881  |
| H  | 25.7778 | 13.9847 | 8.6275  |
| C  | 23.9231 | 14.7884 | 8.8288  |
| C  | 20.9027 | 12.5856 | 12.0497 |
| H  | 20.6172 | 11.7611 | 12.4743 |
| H  | 20.2287 | 13.2631 | 12.2185 |
| C  | 22.2133 | 13.022  | 12.6182 |
| C  | 23.6841 | 13.7422 | 14.0662 |
| C  | 24.3902 | 14.2739 | 15.128  |
| H  | 23.9475 | 14.6762 | 15.8406 |
| C  | 25.755  | 14.1977 | 15.1062 |
| H  | 26.2445 | 14.5207 | 15.829  |
| C  | 26.4246 | 13.6413 | 14.0108 |
| H  | 27.3534 | 13.5998 | 14.0185 |
| C  | 25.7308 | 13.1516 | 12.9173 |

|   |          |          |         |
|---|----------|----------|---------|
| H | 26.1821  | 12.7953  | 12.1864 |
| C | 24.3507  | 13.203   | 12.9431 |
| H | 24.54691 | 11.67043 | 9.83585 |

**IntA:**

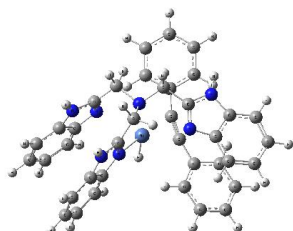

| <b>IntA:</b>                                   |                     |
|------------------------------------------------|---------------------|
| <b>SCF Done: E (RM062X)</b>                    | <b>-2018.433248</b> |
| <b>SCF done for solvent</b>                    | <b>-2019.062940</b> |
| <b>Thermal correction to Gibbs Free Energy</b> | <b>0.560326</b>     |
| <b>Temperature</b>                             | <b>328.15 K</b>     |

**Coordinates**

|    |          |          |          |
|----|----------|----------|----------|
| Ni | -0.18164 | 0.1234   | -0.30627 |
| N  | -0.19732 | 1.37446  | 1.57141  |
| N  | 1.92371  | -0.53363 | 1.93632  |
| N  | 3.45722  | 1.04993  | 1.5831   |
| H  | 3.82926  | 1.97451  | 1.4256   |
| N  | -1.65244 | -0.75031 | 0.64033  |
| N  | -2.79114 | -1.10163 | 2.50162  |
| H  | -3.02641 | -1.07849 | 3.48241  |
| N  | -2.09483 | 1.91629  | -0.81109 |
| N  | -3.48449 | 1.84045  | 0.93255  |
| H  | -3.83872 | 2.01183  | 1.8611   |
| C  | 1.12989  | 1.83436  | 2.02732  |
| H  | 1.082    | 2.19046  | 3.0685   |
| H  | 1.4261   | 2.68185  | 1.40087  |
| C  | 2.15714  | 0.75012  | 1.8725   |
| C  | 4.11956  | -0.15245 | 1.41176  |
| C  | 5.43351  | -0.46652 | 1.06061  |
| H  | 6.18147  | 0.29939  | 0.88559  |
| C  | 5.73529  | -1.81442 | 0.95165  |
| H  | 6.7427   | -2.1101  | 0.67877  |

|   |          |          |          |
|---|----------|----------|----------|
| C | 4.76822  | -2.81153 | 1.19092  |
| H | 5.05134  | -3.85359 | 1.08836  |
| C | 3.46934  | -2.49064 | 1.54402  |
| H | 2.71846  | -3.25354 | 1.71691  |
| C | 3.14143  | -1.13496 | 1.65008  |
| C | -0.79004 | 0.46593  | 2.58536  |
| H | 0.01763  | -0.12581 | 3.0234   |
| H | -1.288   | 1.03815  | 3.38295  |
| C | -1.74661 | -0.46777 | 1.91732  |
| C | -3.42702 | -1.85258 | 1.51782  |
| C | -4.55536 | -2.66991 | 1.54364  |
| H | -5.11057 | -2.8556  | 2.45626  |
| C | -4.93211 | -3.23436 | 0.33499  |
| H | -5.80529 | -3.87659 | 0.30297  |
| C | -4.21488 | -2.99229 | -0.85214 |
| H | -4.55682 | -3.44798 | -1.77488 |
| C | -3.09097 | -2.183   | -0.87015 |
| H | -2.54035 | -1.97164 | -1.78048 |
| C | -2.69778 | -1.61425 | 0.34246  |
| C | -1.08554 | 2.54821  | 1.33463  |
| H | -0.50204 | 3.30173  | 0.8014   |
| H | -1.41933 | 2.97871  | 2.28994  |
| C | -2.24046 | 2.16547  | 0.46315  |
| C | -4.19867 | 1.32796  | -0.1375  |
| C | -5.4861  | 0.79971  | -0.24992 |
| H | -6.16567 | 0.75256  | 0.59395  |
| C | -5.84774 | 0.32519  | -1.49964 |
| H | -6.83534 | -0.10205 | -1.63618 |
| C | -4.96722 | 0.38075  | -2.59981 |
| H | -5.3019  | -0.00085 | -3.5583  |
| C | -3.6936  | 0.90809  | -2.48087 |
| H | -3.00722 | 0.95121  | -3.31967 |
| C | -3.3058  | 1.38471  | -1.22332 |
| H | -0.46651 | -0.70116 | -1.42951 |
| C | 1.15374  | 4.70175  | -1.3928  |
| C | 0.83815  | 3.34501  | -1.41791 |
| C | 1.85536  | 2.39553  | -1.25951 |
| C | 3.1882   | 2.81796  | -1.11638 |
| C | 3.49045  | 4.17376  | -1.09656 |
| C | 2.47172  | 5.11873  | -1.22342 |
| H | 0.36547  | 5.43637  | -1.52129 |
| H | -0.18489 | 3.00784  | -1.56234 |
| H | 3.97199  | 2.06938  | -1.03838 |
| H | 4.52176  | 4.49602  | -0.9961  |
| H | 2.70978  | 6.17703  | -1.20908 |
| C | 1.59774  | 0.97734  | -1.2496  |
| C | 1.72348  | -0.24672 | -1.30492 |
| C | 2.18356  | -1.59974 | -1.49107 |
| C | 1.40488  | -2.7264  | -1.20196 |
| C | 3.4994   | -1.7587  | -1.95167 |
| C | 1.9361   | -3.99645 | -1.39264 |
| H | 0.39554  | -2.59915 | -0.82559 |
| C | 4.01853  | -3.03241 | -2.13863 |
| H | 4.10406  | -0.88088 | -2.15613 |

|   |         |          |          |
|---|---------|----------|----------|
| C | 3.23798 | -4.15299 | -1.86316 |
| H | 1.32992 | -4.86841 | -1.17089 |
| H | 5.03523 | -3.14931 | -2.4983  |
| H | 3.64567 | -5.14744 | -2.01163 |

**IntA1:**

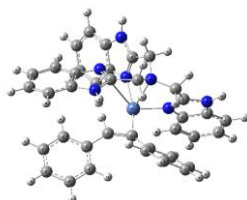

| <b>IntA1:</b>                                  |                     |
|------------------------------------------------|---------------------|
| <b>SCF Done: E (RM062X)</b>                    | <b>-2018.474930</b> |
| <b>SCF done for solvent</b>                    | <b>-2019.104633</b> |
| <b>Thermal correction to Gibbs Free Energy</b> | <b>0.561215</b>     |
| <b>Temperature</b>                             | <b>328.15 K</b>     |

**Coordinates**

|    |          |          |          |
|----|----------|----------|----------|
| Ni | -0.6418  | 0.30805  | 0.38345  |
| N  | -0.75998 | 0.2794   | -2.184   |
| N  | 2.00947  | 0.80882  | -1.62346 |
| N  | 2.57596  | -1.30064 | -2.07731 |
| H  | 2.48172  | -2.25527 | -2.38756 |
| N  | -0.16944 | 2.18945  | -0.04303 |
| N  | 0.55317  | 3.68659  | -1.49684 |
| H  | 0.7928   | 4.08838  | -2.39038 |
| N  | -2.55569 | 0.47258  | -0.05786 |
| N  | -4.34499 | 0.29427  | -1.33837 |
| H  | -4.902   | 0.12617  | -2.16281 |
| C  | 0.2787   | -0.56329 | -2.77218 |
| H  | 0.34821  | -0.42947 | -3.86601 |
| H  | 0.00071  | -1.60615 | -2.58443 |
| C  | 1.62137  | -0.32173 | -2.14517 |
| C  | 3.67447  | -0.7505  | -1.44048 |
| C  | 4.91553  | -1.26844 | -1.07314 |
| H  | 5.19995  | -2.29162 | -1.29273 |
| C  | 5.76106  | -0.41284 | -0.38375 |



|   |          |          |          |
|---|----------|----------|----------|
| H | 6.73643  | -0.77195 | -0.07288 |
| C | 5.38525  | 0.90815  | -0.06793 |
| H | 6.07979  | 1.53564  | 0.47996  |
| C | 4.15407  | 1.41895  | -0.44727 |
| H | 3.85391  | 2.43481  | -0.20881 |
| C | 3.29156  | 0.57212  | -1.15134 |
| C | -0.64417 | 1.71228  | -2.4688  |
| H | 0.00365  | 1.88462  | -3.33903 |
| H | -1.63559 | 2.11062  | -2.72142 |
| C | -0.09643 | 2.51327  | -1.31425 |
| C | 0.9889   | 4.13098  | -0.25735 |
| C | 1.73493  | 5.23782  | 0.14515  |
| H | 2.09565  | 5.97601  | -0.56235 |
| C | 1.99936  | 5.34331  | 1.50263  |
| H | 2.57982  | 6.18547  | 1.86287  |
| C | 1.53328  | 4.38718  | 2.42502  |
| H | 1.76411  | 4.51474  | 3.47677  |
| C | 0.78786  | 3.29271  | 2.0176   |
| H | 0.42281  | 2.55384  | 2.72443  |
| C | 0.51919  | 3.17204  | 0.65275  |
| C | -2.10155 | -0.25266 | -2.38077 |
| H | -2.05073 | -1.34786 | -2.3346  |
| H | -2.54706 | 0.02063  | -3.35173 |
| C | -2.99464 | 0.19391  | -1.26094 |
| C | -4.81562 | 0.6531   | -0.08297 |
| C | -6.09657 | 0.88169  | 0.41876  |
| H | -6.98128 | 0.79847  | -0.20238 |
| C | -6.18061 | 1.21859  | 1.76032  |
| H | -7.15574 | 1.40219  | 2.19768  |
| C | -5.03514 | 1.32597  | 2.57383  |
| H | -5.15593 | 1.58808  | 3.61892  |
| C | -3.76549 | 1.10386  | 2.06859  |
| H | -2.87618 | 1.18027  | 2.68597  |
| C | -3.66728 | 0.76572  | 0.71667  |
| H | 1.01246  | -0.22829 | 1.00665  |
| C | -3.53883 | -3.71338 | -0.04189 |
| C | -2.74335 | -2.68976 | 0.46208  |
| C | -1.36821 | -2.65671 | 0.18713  |
| C | -0.81655 | -3.66893 | -0.61727 |
| C | -1.61821 | -4.68221 | -1.13137 |
| C | -2.98255 | -4.70672 | -0.84589 |
| H | -4.59798 | -3.73588 | 0.19397  |
| H | -3.17771 | -1.91157 | 1.08366  |
| H | 0.25197  | -3.65087 | -0.8206  |
| H | -1.17806 | -5.45837 | -1.74925 |
| H | -3.6072  | -5.50025 | -1.24206 |
| C | -0.54356 | -1.53319 | 0.60776  |
| C | 0.70224  | -1.33325 | 1.01273  |
| C | 1.80716  | -2.16524 | 1.51464  |
| C | 3.08101  | -1.61559 | 1.69211  |
| C | 1.58998  | -3.51223 | 1.84001  |
| C | 4.12522  | -2.40203 | 2.16805  |
| H | 3.26275  | -0.57133 | 1.44428  |
| C | 2.63517  | -4.29189 | 2.3166   |

|   |         |          |         |
|---|---------|----------|---------|
| H | 0.59669 | -3.93692 | 1.73214 |
| C | 3.90685 | -3.74046 | 2.47924 |
| H | 5.10962 | -1.96247 | 2.29198 |
| H | 2.45649 | -5.33139 | 2.57136 |
| H | 4.72014 | -4.35267 | 2.85466 |

**IntB:**

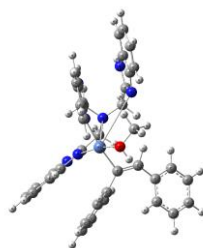

| <b>IntB:</b>                                   |                     |
|------------------------------------------------|---------------------|
| <b>SCF Done: E (RM062X)</b>                    | <b>-2134.125681</b> |
| <b>SCF done for solvent</b>                    | <b>-2134.812523</b> |
| <b>Thermal correction to Gibbs Free Energy</b> | <b>0.616195</b>     |
| <b>Temperature</b>                             | <b>328.15 K</b>     |

**Coordinates**

|    |          |          |          |
|----|----------|----------|----------|
| Ni | -0.29757 | -0.54709 | -0.55286 |
| N  | 0.45334  | 0.93086  | 1.80968  |
| N  | 2.67339  | 1.75384  | -0.12875 |
| N  | 3.67648  | 1.96697  | 1.85835  |
| H  | 3.79467  | 2.2744   | 2.81227  |
| N  | 1.45413  | -1.33322 | 0.15808  |
| N  | 3.29007  | -1.22187 | 1.39113  |
| H  | 3.90688  | -0.92768 | 2.13361  |
| N  | -1.37063 | -1.02147 | 1.04553  |
| N  | -2.64856 | -0.70412 | 2.8185   |
| H  | -3.01125 | -0.26728 | 3.65267  |
| C  | 1.17644  | 2.2004   | 1.80303  |
| H  | 1.32692  | 2.59326  | 2.82511  |
| H  | 0.58149  | 2.92969  | 1.24619  |
| C  | 2.50694  | 2.02409  | 1.13533  |
| C  | 4.68562  | 1.6488   | 0.96738  |

|   |          |          |          |
|---|----------|----------|----------|
| C | 6.05512  | 1.43315  | 1.13008  |
| H | 6.54604  | 1.55057  | 2.0904   |
| C | 6.76291  | 1.07348  | -0.00643 |
| H | 7.83064  | 0.89779  | 0.06869  |
| C | 6.1322   | 0.94642  | -1.25934 |
| H | 6.7285   | 0.67322  | -2.12287 |
| C | 4.7747   | 1.16959  | -1.41231 |
| H | 4.30125  | 1.08939  | -2.38425 |
| C | 4.03281  | 1.51349  | -0.27445 |
| C | 1.23454  | -0.16889 | 2.36813  |
| H | 1.94818  | 0.17262  | 3.13409  |
| H | 0.56626  | -0.88309 | 2.85701  |
| C | 1.97746  | -0.90582 | 1.2885   |
| C | 3.66059  | -1.8896  | 0.23784  |
| C | 4.88159  | -2.3977  | -0.20323 |
| H | 5.78538  | -2.31166 | 0.3896   |
| C | 4.87916  | -3.00478 | -1.44763 |
| H | 5.80367  | -3.41496 | -1.83872 |
| C | 3.70365  | -3.10689 | -2.21855 |
| H | 3.75132  | -3.59891 | -3.1839  |
| C | 2.49545  | -2.59671 | -1.77442 |
| H | 1.58973  | -2.65547 | -2.36928 |
| C | 2.48531  | -1.96758 | -0.52489 |
| C | -0.89299 | 1.04572  | 2.34049  |
| H | -1.39105 | 1.8752   | 1.81887  |
| H | -0.92866 | 1.25807  | 3.42442  |
| C | -1.63664 | -0.22352 | 2.05528  |
| C | -3.09185 | -1.88745 | 2.2449   |
| C | -4.12027 | -2.76995 | 2.57239  |
| H | -4.75293 | -2.62046 | 3.44007  |
| C | -4.29874 | -3.84538 | 1.71772  |
| H | -5.08826 | -4.55932 | 1.9251   |
| C | -3.48641 | -4.03683 | 0.58245  |
| H | -3.67613 | -4.88914 | -0.06049 |
| C | -2.46226 | -3.16099 | 0.26872  |
| H | -1.84235 | -3.28934 | -0.61299 |
| C | -2.27151 | -2.07412 | 1.12392  |
| H | -0.47091 | 2.10173  | -0.73284 |
| C | -4.51114 | -1.72411 | -2.40397 |
| C | -3.32656 | -1.00161 | -2.29566 |
| C | -3.12151 | -0.10484 | -1.23902 |
| C | -4.14002 | 0.03993  | -0.28593 |
| C | -5.31367 | -0.69891 | -0.37872 |
| C | -5.50429 | -1.58419 | -1.43836 |
| H | -4.65258 | -2.40745 | -3.2352  |
| H | -2.54255 | -1.14197 | -3.03708 |
| H | -3.99373 | 0.73806  | 0.53621  |
| H | -6.08415 | -0.5836  | 0.37739  |
| H | -6.4213  | -2.15947 | -1.50957 |
| C | -1.80934 | 0.54527  | -1.05762 |
| C | -1.52201 | 1.85435  | -0.93173 |
| C | -2.39746 | 3.04611  | -0.87895 |
| C | -1.87843 | 4.19841  | -0.27144 |
| C | -3.71949 | 3.08158  | -1.34443 |

|   |          |          |          |
|---|----------|----------|----------|
| C | -2.65925 | 5.33286  | -0.08237 |
| H | -0.83786 | 4.20471  | 0.04706  |
| C | -4.49952 | 4.2172   | -1.15957 |
| H | -4.13644 | 2.21944  | -1.85235 |
| C | -3.98079 | 5.3409   | -0.51787 |
| H | -2.23515 | 6.21037  | 0.39497  |
| H | -5.52168 | 4.22735  | -1.52398 |
| H | -4.59841 | 6.22129  | -0.37411 |
| C | 1.56419  | 0.42366  | -2.76059 |
| H | 2.3919   | -0.0492  | -2.23915 |
| H | 1.70801  | 0.34705  | -3.84116 |
| H | 1.49052  | 1.46446  | -2.44105 |
| H | -0.38678 | 0.16184  | -2.77254 |
| O | 0.37758  | -0.30321 | -2.39898 |

**IntB1:**

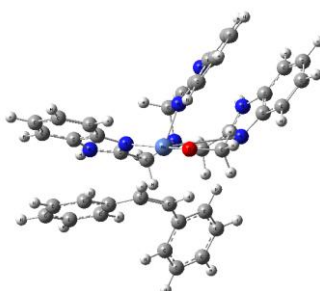

| <b>IntB1:</b>                                  |                     |
|------------------------------------------------|---------------------|
| <b>SCF Done: E (RM062X)</b>                    | <b>-2134.122712</b> |
| <b>SCF done for solvent</b>                    | <b>-2134.814136</b> |
| <b>Thermal correction to Gibbs Free Energy</b> | <b>0.619678</b>     |
| <b>Temperature</b>                             | <b>328.15 K</b>     |

### Coordinates

|    |          |          |          |
|----|----------|----------|----------|
| Ni | -0.40039 | -0.45922 | -0.84529 |
| N  | 0.32702  | 1.01582  | 1.73737  |
| N  | 2.75724  | 1.64612  | 0.07516  |
| N  | 3.64727  | 1.59213  | 2.12707  |
| H  | 3.74678  | 1.82694  | 3.10344  |
| N  | 1.15699  | -1.34454 | 0.03336  |
| N  | 2.86569  | -1.50059 | 1.42608  |
| H  | 3.4519   | -1.28895 | 2.21997  |
| N  | -1.59087 | -0.70335 | 0.72931  |

|   |          |          |          |
|---|----------|----------|----------|
| N | -2.89097 | -0.4352  | 2.48978  |
| H | -3.27646 | -0.01221 | 3.32097  |
| C | 1.20734  | 2.16453  | 1.94466  |
| H | 1.32884  | 2.39468  | 3.01889  |
| H | 0.75899  | 3.03412  | 1.45959  |
| C | 2.54833  | 1.86464  | 1.34277  |
| C | 4.65709  | 1.182    | 1.27401  |
| C | 5.96677  | 0.75344  | 1.49809  |
| H | 6.4078   | 0.74128  | 2.48934  |
| C | 6.68322  | 0.3516   | 0.3812   |
| H | 7.70589  | 0.01116  | 0.50354  |
| C | 6.12008  | 0.38372  | -0.90955 |
| H | 6.72177  | 0.06525  | -1.75359 |
| C | 4.8227   | 0.81653  | -1.12333 |
| H | 4.39191  | 0.85183  | -2.11766 |
| C | 4.07453  | 1.21526  | -0.00826 |
| C | 0.90362  | -0.21519 | 2.27242  |
| H | 1.5985   | -0.01403 | 3.10173  |
| H | 0.1174   | -0.85688 | 2.67911  |
| C | 1.62815  | -1.00103 | 1.21623  |
| C | 3.24121  | -2.21301 | 0.30055  |
| C | 4.41235  | -2.90103 | -0.01493 |
| H | 5.25465  | -2.93588 | 0.66687  |
| C | 4.439    | -3.52877 | -1.24756 |
| H | 5.32469  | -4.08007 | -1.54376 |
| C | 3.3378   | -3.47223 | -2.12487 |
| H | 3.40178  | -3.98459 | -3.0787  |
| C | 2.18334  | -2.77636 | -1.81039 |
| H | 1.34765  | -2.69086 | -2.49353 |
| C | 2.14654  | -2.12434 | -0.57151 |
| C | -1.04813 | 1.26407  | 2.13874  |
| H | -1.39845 | 2.15546  | 1.60043  |
| H | -1.17295 | 1.45454  | 3.22042  |
| C | -1.86831 | 0.06771  | 1.75614  |
| C | -3.32163 | -1.6075  | 1.88438  |
| C | -4.32832 | -2.52464 | 2.18903  |
| H | -4.99231 | -2.39041 | 3.03552  |
| C | -4.43395 | -3.62166 | 1.3496   |
| H | -5.19847 | -4.3649  | 1.54743  |
| C | -3.57118 | -3.80626 | 0.2501   |
| H | -3.68993 | -4.68882 | -0.36873 |
| C | -2.58099 | -2.88889 | -0.05266 |
| H | -1.9126  | -3.01911 | -0.89988 |
| C | -2.47241 | -1.77352 | 0.7824   |
| H | -0.70223 | 1.22253  | -2.68794 |
| C | -5.78043 | -1.04242 | -1.04397 |
| C | -4.57004 | -0.80055 | -1.68392 |
| C | -3.71926 | 0.23019  | -1.26318 |
| C | -4.11902 | 1.01561  | -0.17135 |
| C | -5.3289  | 0.77615  | 0.46809  |
| C | -6.1644  | -0.25275 | 0.03578  |
| H | -6.42042 | -1.84855 | -1.38638 |
| H | -4.26986 | -1.4257  | -2.52081 |
| H | -3.47806 | 1.81402  | 0.18471  |

|   |          |          |          |
|---|----------|----------|----------|
| H | -5.62509 | 1.39926  | 1.3067   |
| H | -7.10989 | -0.4351  | 0.53599  |
| C | -2.436   | 0.37756  | -1.97654 |
| C | -1.52123 | 1.38692  | -1.99537 |
| C | -1.50241 | 2.72092  | -1.35746 |
| C | -0.26817 | 3.22066  | -0.91877 |
| C | -2.62626 | 3.5564   | -1.32498 |
| C | -0.17573 | 4.51584  | -0.41472 |
| H | 0.62195  | 2.59237  | -0.97295 |
| C | -2.52808 | 4.85003  | -0.82325 |
| H | -3.57283 | 3.19562  | -1.71597 |
| C | -1.30502 | 5.33024  | -0.35844 |
| H | 0.78849  | 4.89741  | -0.09023 |
| H | -3.40367 | 5.49047  | -0.81362 |
| H | -1.22741 | 6.34363  | 0.02132  |
| C | 1.53467  | 0.12111  | -2.7648  |
| H | 2.29487  | 0.04405  | -1.97628 |
| H | 1.96728  | -0.27896 | -3.69227 |
| H | 1.34796  | 1.19891  | -2.92632 |
| H | -2.22264 | -0.42421 | -2.68681 |
| O | 0.37215  | -0.58988 | -2.46197 |

**IntC:**

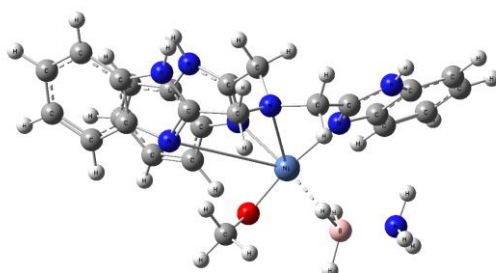

| <b>IntC:</b>                                   |                     |
|------------------------------------------------|---------------------|
| <b>SCF Done: E (RM062X)</b>                    | <b>-1676.950634</b> |
| <b>SCF done for solvent</b>                    | <b>-1677.520005</b> |
| <b>Thermal correction to Gibbs Free Energy</b> | <b>0.481668</b>     |
| <b>Temperature</b>                             | <b>328.15 K</b>     |

**Coordinates**

|    |          |          |          |
|----|----------|----------|----------|
| Ni | -1.17568 | 0.77966  | 0.75111  |
| N  | -0.26672 | -2.08997 | 0.50867  |
| N  | 2.4119   | -0.9111  | 1.43909  |
| N  | 3.08718  | -2.68831 | 0.26132  |
| H  | 3.12664  | -3.65689 | -0.01883 |
| N  | 0.29943  | 0.59106  | -0.574   |
| N  | 1.90124  | -0.38246 | -1.74742 |
| H  | 2.46926  | -1.12782 | -2.12204 |
| N  | -2.51442 | -0.51032 | -0.09797 |
| N  | -3.83167 | -2.27928 | -0.29263 |
| H  | -4.11937 | -3.24676 | -0.26255 |
| C  | 0.78235  | -2.77126 | 1.27432  |
| H  | 0.85044  | -3.8394  | 0.99878  |
| H  | 0.52781  | -2.70761 | 2.33591  |
| C  | 2.11077  | -2.11405 | 1.04842  |
| C  | 4.11707  | -1.76656 | 0.17037  |
| C  | 5.3417   | -1.7739  | -0.50047 |
| H  | 5.69019  | -2.63744 | -1.05706 |
| C  | 6.09849  | -0.61524 | -0.41112 |
| H  | 7.06002  | -0.57359 | -0.91183 |
| C  | 5.65331  | 0.50989  | 0.31215  |
| H  | 6.27804  | 1.3959   | 0.34082  |
| C  | 4.43884  | 0.50901  | 0.97506  |
| H  | 4.07648  | 1.37493  | 1.51903  |
| C  | 3.66288  | -0.6536  | 0.90468  |
| C  | 0.08889  | -1.88155 | -0.89353 |
| H  | 0.7561   | -2.66953 | -1.27509 |
| H  | -0.81334 | -1.90567 | -1.51045 |
| C  | 0.74417  | -0.54376 | -1.06855 |
| C  | 2.2572   | 0.95331  | -1.67094 |
| C  | 3.36304  | 1.64541  | -2.16227 |
| H  | 4.15261  | 1.14263  | -2.70969 |
| C  | 3.40552  | 3.00059  | -1.88746 |
| H  | 4.24612  | 3.5884   | -2.24025 |
| C  | 2.38231  | 3.63399  | -1.15377 |
| H  | 2.45924  | 4.69868  | -0.96151 |
| C  | 1.29179  | 2.93877  | -0.66053 |
| H  | 0.52497  | 3.40545  | -0.05711 |
| C  | 1.2387   | 1.56417  | -0.92423 |
| C  | -1.56747 | -2.68767 | 0.70426  |
| H  | -1.73796 | -2.79026 | 1.78331  |
| H  | -1.66985 | -3.69854 | 0.26509  |
| C  | -2.62814 | -1.80356 | 0.11669  |
| C  | -4.56066 | -1.21909 | -0.80651 |
| C  | -5.84502 | -1.13014 | -1.34537 |
| H  | -6.49422 | -1.99453 | -1.42789 |
| C  | -6.24511 | 0.12464  | -1.77562 |
| H  | -7.23338 | 0.24607  | -2.20498 |
| C  | -5.39593 | 1.24561  | -1.68219 |
| H  | -5.74797 | 2.20328  | -2.0491  |
| C  | -4.12091 | 1.15141  | -1.14736 |
| H  | -3.46053 | 2.00917  | -1.08436 |
| C  | -3.70913 | -0.10809 | -0.69167 |
| C  | 0.43472  | 1.66281  | 2.72971  |

|   |          |         |         |
|---|----------|---------|---------|
| H | 1.12855  | 0.8336  | 2.53509 |
| H | 1.02523  | 2.51553 | 3.09236 |
| H | -0.24583 | 1.3693  | 3.54888 |
| O | -0.25726 | 2.06578 | 1.58299 |
| B | -2.88837 | 1.74899 | 2.13745 |
| H | -2.22018 | 0.69392 | 2.17835 |
| H | -2.64597 | 2.36924 | 3.12896 |
| H | -2.83259 | 2.38104 | 1.11589 |
| N | -4.43154 | 1.21645 | 2.24283 |
| H | -5.04226 | 2.02714 | 2.34084 |
| H | -4.58048 | 0.62552 | 3.05929 |
| H | -4.73006 | 0.70973 | 1.40636 |

**IntC1:**

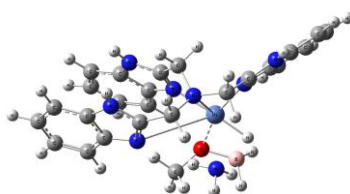

| <b>IntC1:</b>                                  |                     |
|------------------------------------------------|---------------------|
| <b>SCF Done: E (RM062X)</b>                    | <b>-1676.983428</b> |
| <b>SCF done for solvent</b>                    | <b>-1677.535689</b> |
| <b>Thermal correction to Gibbs Free Energy</b> | <b>0.481818</b>     |
| <b>Temperature</b>                             | <b>328.15 K</b>     |

**Coordinates**

|    |          |          |          |
|----|----------|----------|----------|
| Ni | -1.18529 | 0.70824  | 0.64667  |
| N  | -0.2912  | -2.08272 | 0.48528  |
| N  | 2.36366  | -0.84192 | 1.44284  |
| N  | 3.0711   | -2.65565 | 0.34172  |
| H  | 3.11488  | -3.63187 | 0.08915  |
| N  | 0.28426  | 0.54521  | -0.65756 |



|   |          |          |          |
|---|----------|----------|----------|
| N | 1.92772  | -0.42521 | -1.76666 |
| H | 2.51062  | -1.16807 | -2.12426 |
| N | -2.5064  | -0.50717 | -0.13354 |
| N | -3.87437 | -2.22941 | -0.29112 |
| H | -4.21092 | -3.17732 | -0.2091  |
| C | 0.74747  | -2.72658 | 1.29571  |
| H | 0.83816  | -3.80093 | 1.05456  |
| H | 0.46492  | -2.63773 | 2.34827  |
| C | 2.07411  | -2.05987 | 1.08248  |
| C | 4.10305  | -1.73817 | 0.24702  |
| C | 5.34455  | -1.77151 | -0.39118 |
| H | 5.70267  | -2.65405 | -0.91053 |
| C | 6.10635  | -0.61546 | -0.31662 |
| H | 7.08138  | -0.59363 | -0.79158 |
| C | 5.64931  | 0.53072  | 0.36438  |
| H | 6.28041  | 1.41228  | 0.3907   |
| C | 4.41761  | 0.55443  | 0.99454  |
| H | 4.06084  | 1.43884  | 1.51191  |
| C | 3.6319   | -0.60315 | 0.93557  |
| C | 0.09271  | -1.92531 | -0.9169  |
| H | 0.75935  | -2.72944 | -1.2642  |
| H | -0.80202 | -1.95456 | -1.54498 |
| C | 0.75602  | -0.59424 | -1.11793 |
| C | 2.26536  | 0.91744  | -1.70247 |
| C | 3.37678  | 1.6246   | -2.15727 |
| H | 4.19392  | 1.13292  | -2.67315 |
| C | 3.38969  | 2.983    | -1.88962 |
| H | 4.23386  | 3.57979  | -2.21704 |
| C | 2.33283  | 3.61002  | -1.19983 |
| H | 2.38578  | 4.67776  | -1.01784 |
| C | 1.23307  | 2.9009   | -0.74724 |
| H | 0.42612  | 3.37598  | -0.20144 |
| C | 1.21301  | 1.52499  | -1.00225 |
| C | -1.59632 | -2.68737 | 0.6728   |
| H | -1.77174 | -2.79271 | 1.75003  |
| H | -1.6879  | -3.69468 | 0.22733  |
| C | -2.65315 | -1.79473 | 0.09335  |
| C | -4.58977 | -1.14077 | -0.76579 |
| C | -5.89595 | -0.99965 | -1.23031 |
| H | -6.57564 | -1.84121 | -1.30191 |
| C | -6.28518 | 0.28233  | -1.58765 |
| H | -7.29222 | 0.44494  | -1.95555 |
| C | -5.40683 | 1.37975  | -1.48851 |
| H | -5.75936 | 2.36289  | -1.77955 |
| C | -4.10837 | 1.22952  | -1.02926 |
| H | -3.43146 | 2.07377  | -0.93828 |
| C | -3.70847 | -0.05708 | -0.66455 |
| C | 0.70957  | 1.79157  | 2.46703  |
| H | 1.56105  | 1.66013  | 1.79911  |
| H | 0.87815  | 2.62438  | 3.1522   |
| H | 0.55111  | 0.86786  | 3.03068  |
| O | -0.43685 | 2.1017   | 1.66385  |
| B | -1.76659 | 2.07167  | 2.30639  |
| H | -2.27422 | 0.91425  | 1.79925  |

|   |          |         |         |
|---|----------|---------|---------|
| H | -1.76369 | 1.82299 | 3.47748 |
| H | -2.50361 | 2.91738 | 1.8792  |
| N | -4.88996 | 0.49448 | 2.08382 |
| H | -4.49764 | 1.43294 | 2.07113 |
| H | -5.26351 | 0.36478 | 3.02061 |
| H | -5.69451 | 0.52813 | 1.46083 |

**Ni-OMe:**

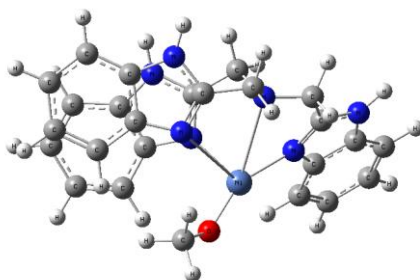

| <b>Ni-OMe:</b>                                 |                     |
|------------------------------------------------|---------------------|
| <b>SCF Done: E (RM062X)</b>                    | <b>-1593.817077</b> |
| <b>SCF done for solvent</b>                    | <b>-1594.311066</b> |
| <b>Thermal correction to Gibbs Free Energy</b> | <b>0.413816</b>     |
| <b>Temperature</b>                             | <b>328.15 K</b>     |

**Coordinates**

|    |          |          |          |
|----|----------|----------|----------|
| Ni | -0.40039 | -0.45922 | -0.84529 |
| N  | 0.32702  | 1.01582  | 1.73737  |
| N  | 2.75724  | 1.64612  | 0.07516  |
| N  | 3.64727  | 1.59213  | 2.12707  |
| H  | 3.74678  | 1.82694  | 3.10344  |
| N  | 1.15699  | -1.34454 | 0.03336  |
| N  | 2.86569  | -1.50059 | 1.42608  |
| H  | 3.4519   | -1.28895 | 2.21997  |
| N  | -1.59087 | -0.70335 | 0.72931  |
| N  | -2.89097 | -0.4352  | 2.48978  |
| H  | -3.27646 | -0.01221 | 3.32097  |
| C  | 1.20734  | 2.16453  | 1.94466  |
| H  | 1.32884  | 2.39468  | 3.01889  |

|   |          |          |          |
|---|----------|----------|----------|
| H | 0.75899  | 3.03412  | 1.45959  |
| C | 2.54833  | 1.86464  | 1.34277  |
| C | 4.65709  | 1.182    | 1.27401  |
| C | 5.96677  | 0.75344  | 1.49809  |
| H | 6.4078   | 0.74128  | 2.48934  |
| C | 6.68322  | 0.3516   | 0.3812   |
| H | 7.70589  | 0.01116  | 0.50354  |
| C | 6.12008  | 0.38372  | -0.90955 |
| H | 6.72177  | 0.06525  | -1.75359 |
| C | 4.8227   | 0.81653  | -1.12333 |
| H | 4.39191  | 0.85183  | -2.11766 |
| C | 4.07453  | 1.21526  | -0.00826 |
| C | 0.90362  | -0.21519 | 2.27242  |
| H | 1.5985   | -0.01403 | 3.10173  |
| H | 0.1174   | -0.85688 | 2.67911  |
| C | 1.62815  | -1.00103 | 1.21623  |
| C | 3.24121  | -2.21301 | 0.30055  |
| C | 4.41235  | -2.90103 | -0.01493 |
| H | 5.25465  | -2.93588 | 0.66687  |
| C | 4.439    | -3.52877 | -1.24756 |
| H | 5.32469  | -4.08007 | -1.54376 |
| C | 3.3378   | -3.47223 | -2.12487 |
| H | 3.40178  | -3.98459 | -3.0787  |
| C | 2.18334  | -2.77636 | -1.81039 |
| H | 1.34765  | -2.69086 | -2.49353 |
| C | 2.14654  | -2.12434 | -0.57151 |
| C | -1.04813 | 1.26407  | 2.13874  |
| H | -1.39845 | 2.15546  | 1.60043  |
| H | -1.17295 | 1.45454  | 3.22042  |
| C | -1.86831 | 0.06771  | 1.75614  |
| C | -3.32163 | -1.6075  | 1.88438  |
| C | -4.32832 | -2.52464 | 2.18903  |
| H | -4.99231 | -2.39041 | 3.03552  |
| C | -4.43395 | -3.62166 | 1.3496   |
| H | -5.19847 | -4.3649  | 1.54743  |
| C | -3.57118 | -3.80626 | 0.2501   |
| H | -3.68993 | -4.68882 | -0.36873 |
| C | -2.58099 | -2.88889 | -0.05266 |
| H | -1.9126  | -3.01911 | -0.89988 |
| C | -2.47241 | -1.77352 | 0.7824   |
| C | 1.53467  | 0.12111  | -2.7648  |
| H | 2.29487  | 0.04405  | -1.97628 |
| H | 1.96728  | -0.27896 | -3.69227 |
| H | 1.34796  | 1.19891  | -2.92632 |
| O | 0.37215  | -0.58988 | -2.46197 |

**L<sub>1</sub>Ni-H:**

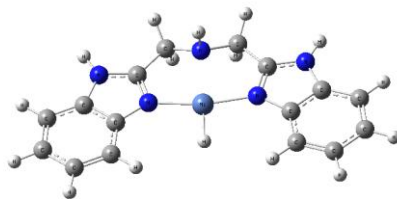

| <b>L<sub>1</sub>Ni-H:</b>                      |                     |
|------------------------------------------------|---------------------|
| <b>SCF Done: E (RM062X)</b>                    | <b>-1061.659215</b> |
| <b>SCF done for solvent</b>                    | <b>-1061.999681</b> |
| <b>Thermal correction to Gibbs Free Energy</b> | <b>0.262426</b>     |
| <b>Temperature</b>                             | <b>328.15 K</b>     |

**Coordinates**

|    |        |        |         |
|----|--------|--------|---------|
| Ni | 3.2724 | 4.6653 | 6.0293  |
| N  | 5.3534 | 4.4113 | 6.3051  |
| H  | 5.4875 | 3.5086 | 6.6622  |
| N  | 3.7896 | 3.9619 | 4.1677  |
| N  | 5.4327 | 3.3694 | 2.7967  |
| H  | 6.2307 | 3.2564 | 2.4966  |
| N  | 3.4821 | 5.4069 | 7.954   |
| N  | 4.8651 | 6.4267 | 9.3658  |
| H  | 5.6022 | 6.6975 | 9.7164  |
| C  | 6.0472 | 4.469  | 5.0011  |
| H  | 6.8549 | 3.9321 | 5.0251  |
| H  | 6.2901 | 5.3834 | 4.7885  |
| C  | 5.0938 | 3.9303 | 3.9756  |
| C  | 4.2588 | 3.0093 | 2.1606  |
| C  | 4.0049 | 2.3565 | 0.959   |
| H  | 4.6928 | 2.1036 | 0.3864  |
| C  | 2.6811 | 2.1011 | 0.6575  |
| H  | 2.4725 | 1.6654 | -0.1372 |
| C  | 1.6463 | 2.4824 | 1.5192  |
| H  | 0.7674 | 2.2938 | 1.2808  |
| C  | 1.8943 | 3.1323 | 2.7167  |
| H  | 1.2031 | 3.3856 | 3.2849  |
| C  | 3.2238 | 3.3871 | 3.0296  |
| C  | 5.8653 | 5.3526 | 7.3107  |
| H  | 6.2027 | 6.1523 | 6.8778  |
| H  | 6.5899 | 4.9453 | 7.8106  |
| C  | 4.7372 | 5.7019 | 8.2309  |
| C  | 3.5926 | 6.6525 | 9.8591  |
| C  | 3.1308 | 7.3979 | 10.9443 |

|   |         |         |         |
|---|---------|---------|---------|
| H | 3.7125  | 7.8509  | 11.5114 |
| C | 1.7645  | 7.4263  | 11.1295 |
| H | 1.4138  | 7.9235  | 11.833  |
| C | 0.8914  | 6.7281  | 10.2874 |
| H | -0.0214 | 6.7475  | 10.4642 |
| C | 1.3551  | 6.0053  | 9.1923  |
| H | 0.771   | 5.5489  | 8.631   |
| C | 2.7281  | 5.9944  | 8.9719  |
| H | 1.85123 | 4.87627 | 5.8337  |

**IntA':**

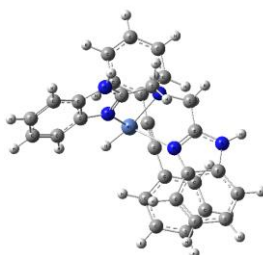

| <b>IntA'</b>                                   |                     |
|------------------------------------------------|---------------------|
| <b>SCF Done: E (RM062X)</b>                    | <b>-1600.727311</b> |
| <b>SCF done for solvent</b>                    | <b>-1601.233183</b> |
| <b>Thermal correction to Gibbs Free Energy</b> | <b>0.438564</b>     |
| <b>Temperature</b>                             | <b>328.15 K</b>     |

**Coordinates**

|    |          |          |          |
|----|----------|----------|----------|
| Ni | 0.76041  | -0.57108 | -0.63591 |
| N  | 0.61734  | -2.07743 | 0.94587  |
| N  | -0.64111 | 0.22379  | 1.87602  |
| N  | -2.66787 | -0.70953 | 1.78292  |
| H  | -3.36559 | -1.4345  | 1.71341  |
| N  | 2.5869   | -0.53756 | -0.02022 |
| N  | 4.07319  | -0.90466 | 1.57038  |
| H  | 4.46539  | -1.23322 | 2.44027  |
| C  | -0.6817  | -2.24051 | 1.62611  |
| H  | -0.55661 | -2.73478 | 2.59943  |
| H  | -1.32001 | -2.87917 | 1.01027  |
| C  | -1.3157  | -0.89123 | 1.78758  |
| C  | -2.8899  | 0.65505  | 1.86394  |
| C  | -4.05412 | 1.42479  | 1.86821  |
| H  | -5.04118 | 0.97719  | 1.82522  |

|   |          |          |          |
|---|----------|----------|----------|
| C | -3.88257 | 2.79797  | 1.93216  |
| H | -4.75707 | 3.43974  | 1.93751  |
| C | -2.60157 | 3.38296  | 1.99443  |
| H | -2.51923 | 4.46356  | 2.03979  |
| C | -1.45305 | 2.61134  | 1.99644  |
| H | -0.4646  | 3.0554   | 2.03915  |
| C | -1.60426 | 1.22228  | 1.92727  |
| C | 1.69454  | -1.74996 | 1.90611  |
| H | 1.28623  | -1.02274 | 2.61533  |
| H | 2.0429   | -2.63159 | 2.45825  |
| C | 2.80281  | -1.09184 | 1.15241  |
| C | 4.73161  | -0.15757 | 0.5984   |
| C | 6.03356  | 0.33378  | 0.51368  |
| H | 6.76643  | 0.15953  | 1.29315  |
| C | 6.34069  | 1.06534  | -0.62238 |
| H | 7.33945  | 1.47247  | -0.73371 |
| C | 5.39094  | 1.29484  | -1.63689 |
| H | 5.68126  | 1.8724   | -2.5073  |
| C | 4.10078  | 0.8002   | -1.54908 |
| H | 3.36169  | 0.96589  | -2.32527 |
| C | 3.77733  | 0.06623  | -0.40607 |
| H | 1.15429  | 0.26915  | -1.72158 |
| C | -1.36762 | -4.54723 | -1.74955 |
| C | -0.89086 | -3.24048 | -1.76819 |
| C | -1.74825 | -2.18072 | -1.44207 |
| C | -3.09136 | -2.44199 | -1.1277  |
| C | -3.55914 | -3.75028 | -1.11678 |
| C | -2.69646 | -4.80455 | -1.41619 |
| H | -0.70552 | -5.36639 | -2.00923 |
| H | 0.1373   | -3.02848 | -2.05205 |
| H | -3.75073 | -1.60944 | -0.90139 |
| H | -4.59938 | -3.95005 | -0.88196 |
| H | -3.0643  | -5.82484 | -1.4062  |
| C | -1.284   | -0.82194 | -1.37795 |
| C | -1.12043 | 0.39382  | -1.31453 |
| C | -1.23059 | 1.82914  | -1.3142  |
| C | -0.1332  | 2.68824  | -1.18087 |
| C | -2.52524 | 2.35903  | -1.43105 |
| C | -0.33355 | 4.0632   | -1.18629 |
| H | 0.86355  | 2.27545  | -1.07087 |
| C | -2.71171 | 3.73434  | -1.43428 |
| H | -3.37308 | 1.68647  | -1.51228 |
| C | -1.61718 | 4.58849  | -1.31677 |
| H | 0.51806  | 4.7282   | -1.08969 |
| H | -3.71366 | 4.13943  | -1.52719 |
| H | -1.7653  | 5.66328  | -1.32293 |
| H | 0.84772  | -2.95782 | 0.48648  |

IntA1':

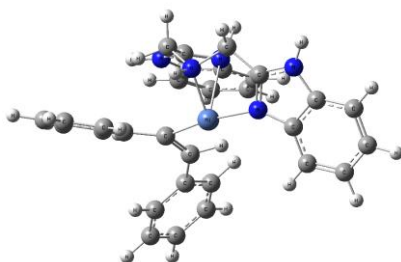

| IntA1'                                  |              |
|-----------------------------------------|--------------|
| SCF Done: E (RM062X)                    | -1600.744372 |
| SCF done for solvent                    | -1601.258042 |
| Thermal correction to Gibbs Free Energy | 0.443536     |
| Temperature                             | 328.15 K     |

Coordinates

|    |          |          |          |
|----|----------|----------|----------|
| Ni | 0.80808  | -0.7365  | -0.42439 |
| N  | 0.82676  | -2.29649 | 0.94826  |
| N  | -0.42118 | 0.01886  | 1.95274  |
| N  | -2.45069 | -0.89919 | 1.79986  |
| H  | -3.14336 | -1.61092 | 1.61944  |
| N  | 2.67418  | -0.47991 | 0.14479  |
| N  | 4.25615  | -1.01923 | 1.58624  |
| H  | 4.70599  | -1.44951 | 2.38063  |
| C  | -0.48417 | -2.44697 | 1.62885  |
| H  | -0.36471 | -2.98866 | 2.57642  |
| H  | -1.1337  | -3.0407  | 0.97897  |
| C  | -1.1012  | -1.092   | 1.83969  |
| C  | -2.66427 | 0.46735  | 1.83949  |
| C  | -3.82208 | 1.24328  | 1.76479  |
| H  | -4.80906 | 0.7986   | 1.69496  |
| C  | -3.64308 | 2.61742  | 1.77864  |
| H  | -4.51119 | 3.26484  | 1.7157   |
| C  | -2.36182 | 3.19658  | 1.87018  |
| H  | -2.27238 | 4.27736  | 1.86781  |
| C  | -1.22019 | 2.41763  | 1.95697  |
| H  | -0.23199 | 2.85961  | 2.02709  |
| C  | -1.37717 | 1.02733  | 1.94162  |
| C  | 1.90713  | -1.96911 | 1.92127  |
| H  | 1.46451  | -1.33237 | 2.69376  |
| H  | 2.31547  | -2.87111 | 2.39036  |
| C  | 2.96402  | -1.17568 | 1.21893  |
| C  | 4.84971  | -0.15281 | 0.67294  |

|   |          |          |          |
|---|----------|----------|----------|
| C | 6.14524  | 0.34798  | 0.54874  |
| H | 6.93103  | 0.09372  | 1.25087  |
| C | 6.37797  | 1.191    | -0.52636 |
| H | 7.37025  | 1.60553  | -0.66483 |
| C | 5.36414  | 1.52362  | -1.44622 |
| H | 5.6007   | 2.18346  | -2.27331 |
| C | 4.08029  | 1.02368  | -1.31782 |
| H | 3.29483  | 1.26694  | -2.02611 |
| C | 3.83309  | 0.17644  | -0.23571 |
| H | 0.42764  | 0.80441  | -0.97474 |
| C | -1.98276 | -4.26038 | -1.79556 |
| C | -1.22359 | -3.0993  | -1.71547 |
| C | -1.80799 | -1.87089 | -1.35756 |
| C | -3.18653 | -1.83563 | -1.10305 |
| C | -3.94336 | -3.00305 | -1.17055 |
| C | -3.34552 | -4.21699 | -1.50768 |
| H | -1.51439 | -5.19624 | -2.0824  |
| H | -0.16004 | -3.12486 | -1.94184 |
| H | -3.65091 | -0.89304 | -0.82538 |
| H | -5.00869 | -2.9651  | -0.9665  |
| H | -3.94279 | -5.12112 | -1.55731 |
| C | -0.91239 | -0.74106 | -1.17227 |
| C | -0.67703 | 0.5469   | -1.28373 |
| C | -1.26098 | 1.87051  | -1.53452 |
| C | -0.42547 | 2.99306  | -1.46255 |
| C | -2.63522 | 2.05101  | -1.71535 |
| C | -0.94783 | 4.27425  | -1.56366 |
| H | 0.64267  | 2.85729  | -1.30561 |
| C | -3.15704 | 3.3366   | -1.80879 |
| H | -3.28935 | 1.18647  | -1.76808 |
| C | -2.31979 | 4.44818  | -1.7292  |
| H | -0.2893  | 5.13427  | -1.50548 |
| H | -4.2257  | 3.47258  | -1.93827 |
| H | -2.73715 | 5.44716  | -1.79846 |
| H | 1.05153  | -3.18172 | 0.49667  |

**TS1:**

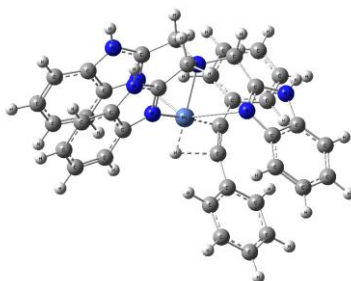

| <b>TS1</b>                  |                     |
|-----------------------------|---------------------|
| <b>SCF Done: E (RM062X)</b> | <b>-2018.430683</b> |



|                                                |                     |
|------------------------------------------------|---------------------|
| <b>SCF done for solvent</b>                    | <b>-2019.061749</b> |
| <b>Thermal correction to Gibbs Free Energy</b> | <b>0.561750</b>     |
| <b>Temperature</b>                             | <b>328.15 K</b>     |

**Coordinates**

|    |          |          |          |
|----|----------|----------|----------|
| Ni | 23.16    | 11.9351  | 10.1659  |
| N  | 21.19457 | 11.90024 | 10.55486 |
| N  | 21.82036 | 10.62608 | 8.49475  |
| N  | 19.84175 | 10.15127 | 7.59593  |
| H  | 18.84544 | 10.01303 | 7.52105  |
| N  | 23.8506  | 13.50169 | 9.59864  |
| N  | 22.39643 | 15.1376  | 9.24544  |
| H  | 21.52    | 15.62105 | 9.22403  |
| N  | 23.59326 | 12.61803 | 12.00886 |
| N  | 22.43446 | 13.81054 | 13.48648 |
| H  | 21.63828 | 14.2147  | 13.94761 |
| C  | 20.07449 | 11.04408 | 10.1434  |
| H  | 19.14345 | 11.56815 | 10.13496 |
| H  | 19.97226 | 10.2119  | 10.81004 |
| C  | 20.5318  | 10.59006 | 8.72551  |
| C  | 20.77141 | 9.93749  | 6.60499  |
| C  | 20.68804 | 9.5132   | 5.25549  |
| H  | 19.75338 | 9.25414  | 4.7882   |
| C  | 21.87288 | 9.44298  | 4.53071  |
| H  | 21.84575 | 9.12891  | 3.5037   |
| C  | 23.09773 | 9.76138  | 5.1001   |
| H  | 23.99994 | 9.72923  | 4.51335  |
| C  | 23.1765  | 10.12881 | 6.40935  |
| H  | 24.12506 | 10.34019 | 6.88599  |
| C  | 21.99343 | 10.22383 | 7.12456  |
| C  | 21.20587 | 13.02851 | 9.5968   |
| H  | 21.01131 | 12.63193 | 8.61722  |
| H  | 20.42165 | 13.70506 | 9.8638   |
| C  | 22.53724 | 13.84527 | 9.50854  |
| C  | 23.5488  | 15.67961 | 9.01147  |
| C  | 23.76808 | 16.97074 | 8.65615  |
| H  | 22.95408 | 17.66265 | 8.62548  |
| C  | 25.03214 | 17.33737 | 8.34084  |
| H  | 25.2098  | 18.34596 | 8.0326   |
| C  | 26.11204 | 16.39272 | 8.40548  |
| H  | 27.10524 | 16.69844 | 8.11502  |
| C  | 25.88008 | 15.08902 | 8.84623  |
| H  | 26.68712 | 14.36849 | 8.94276  |
| C  | 24.53262 | 14.75359 | 9.14428  |
| C  | 21.06088 | 12.34284 | 11.95011 |
| H  | 20.81467 | 11.49636 | 12.54864 |
| H  | 20.28634 | 13.0694  | 12.03409 |
| C  | 22.38392 | 12.92102 | 12.46424 |
| C  | 23.7012  | 14.04651 | 13.78497 |

|   |          |          |          |
|---|----------|----------|----------|
| C | 24.20628 | 14.81376 | 14.76563 |
| H | 23.5659  | 15.36721 | 15.42213 |
| C | 25.5639  | 14.85946 | 14.9015  |
| H | 25.99862 | 15.43336 | 15.70569 |
| C | 26.39696 | 14.14537 | 13.98355 |
| H | 27.46458 | 14.18813 | 14.07219 |
| C | 25.83768 | 13.3948  | 12.97166 |
| H | 26.44725 | 12.86178 | 12.25765 |
| C | 24.48728 | 13.34859 | 12.91358 |
| H | 24.84216 | 10.93793 | 9.68798  |
| C | 24.12235 | 7.00955  | 14.05641 |
| C | 24.51596 | 7.81609  | 12.96251 |
| C | 23.54984 | 8.23625  | 12.01017 |
| C | 22.22286 | 7.79027  | 12.11553 |
| C | 21.83775 | 6.98422  | 13.20194 |
| C | 22.78069 | 6.59079  | 14.16774 |
| H | 24.83799 | 6.7111   | 14.7919  |
| H | 25.54278 | 8.11558  | 12.84341 |
| H | 21.49414 | 8.05341  | 11.37643 |
| H | 20.81814 | 6.67108  | 13.28794 |
| H | 22.46844 | 5.97288  | 14.98709 |
| C | 23.93685 | 9.19749  | 10.839   |
| C | 24.39915 | 9.39027  | 9.60606  |
| C | 25.1201  | 8.86746  | 8.32005  |
| C | 26.07974 | 9.67099  | 7.65025  |
| C | 24.8191  | 7.58508  | 7.83432  |
| C | 26.79914 | 9.13923  | 6.55461  |
| H | 26.25495 | 10.6796  | 7.98456  |
| C | 25.53282 | 7.06322  | 6.73957  |
| H | 24.05004 | 6.99317  | 8.2846   |
| C | 26.5183  | 7.83487  | 6.09922  |
| H | 27.54624 | 9.72767  | 6.0667   |
| H | 25.31986 | 6.07314  | 6.39443  |
| H | 27.05321 | 7.42127  | 5.2672   |

**TS2:**

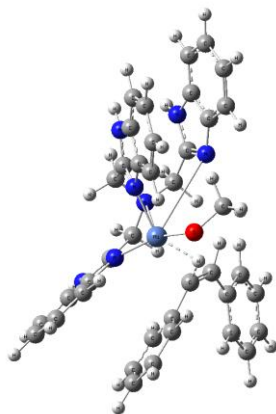

| <b>TS2</b>                                     |                     |
|------------------------------------------------|---------------------|
| <b>SCF Done: E (RM062X)</b>                    | <b>-2134.101864</b> |
| <b>SCF done for solvent</b>                    | <b>-2134.783724</b> |
| <b>Thermal correction to Gibbs Free Energy</b> | <b>0.611051</b>     |
| <b>Temperature</b>                             | <b>328.15 K</b>     |

**Coordinates**

|    |          |          |          |
|----|----------|----------|----------|
| Ni | -0.18377 | -0.39382 | -0.53502 |
| N  | 0.40941  | 0.46035  | 1.96627  |
| N  | 2.55893  | 1.54259  | 0.08326  |
| N  | 3.55246  | 1.83555  | 2.04514  |
| H  | 3.64772  | 2.09971  | 3.01456  |
| N  | 1.55776  | -1.34588 | 0.03574  |
| N  | 3.33512  | -1.56325 | 1.33813  |
| H  | 3.91161  | -1.5001  | 2.16342  |
| N  | -1.2954  | -1.38122 | 0.78473  |
| N  | -2.65406 | -1.45247 | 2.52545  |
| H  | -3.08907 | -1.18126 | 3.3945   |
| C  | 1.04927  | 1.76761  | 2.07978  |
| H  | 1.21302  | 2.07296  | 3.12841  |
| H  | 0.38875  | 2.50415  | 1.61229  |
| C  | 2.37081  | 1.75053  | 1.36236  |
| C  | 4.58005  | 1.6808   | 1.13047  |
| C  | 5.9705   | 1.66917  | 1.25605  |
| H  | 6.465    | 1.84069  | 2.20585  |
| C  | 6.68882  | 1.42738  | 0.09639  |
| H  | 7.77235  | 1.41342  | 0.14029  |
| C  | 6.0502   | 1.19583  | -1.13952 |
| H  | 6.65759  | 0.99443  | -2.01494 |
| C  | 4.67202  | 1.21724  | -1.2583  |
| H  | 4.1733   | 1.02348  | -2.20268 |
| C  | 3.93248  | 1.47566  | -0.09886 |
| C  | 1.24604  | -0.65142 | 2.41292  |
| H  | 1.9425   | -0.34887 | 3.21108  |
| H  | 0.61204  | -1.44179 | 2.82692  |
| C  | 2.02636  | -1.21366 | 1.25482  |
| C  | 3.75687  | -1.92826 | 0.06965  |
| C  | 4.99715  | -2.32286 | -0.43046 |
| H  | 5.86866  | -2.4195  | 0.20737  |
| C  | 5.05921  | -2.56741 | -1.79218 |
| H  | 6.00202  | -2.87307 | -2.23267 |
| C  | 3.92676  | -2.43285 | -2.62039 |
| H  | 4.0247   | -2.64166 | -3.68011 |
| C  | 2.69766  | -2.04528 | -2.11449 |
| H  | 1.82495  | -1.94343 | -2.74994 |
| C  | 2.62067  | -1.78619 | -0.74217 |
| C  | -0.95861 | 0.42365  | 2.46014  |

|   |          |          |          |
|---|----------|----------|----------|
| H | -1.47942 | 1.30926  | 2.07224  |
| H | -1.03301 | 0.43535  | 3.56124  |
| C | -1.63599 | -0.80073 | 1.91381  |
| C | -3.01989 | -2.52004 | 1.71928  |
| C | -4.00103 | -3.50226 | 1.84858  |
| H | -4.67601 | -3.53155 | 2.69647  |
| C | -4.06798 | -4.43869 | 0.831    |
| H | -4.81632 | -5.22192 | 0.88272  |
| C | -3.18812 | -4.40375 | -0.26927 |
| H | -3.28127 | -5.16169 | -1.0391  |
| C | -2.21561 | -3.42684 | -0.38948 |
| H | -1.53902 | -3.39036 | -1.23767 |
| C | -2.14424 | -2.46776 | 0.62457  |
| H | -1.26412 | 3.00482  | -0.59098 |
| C | -5.25604 | -0.87949 | -2.27739 |
| C | -4.06445 | -0.1635  | -2.20497 |
| C | -3.81575 | 0.71696  | -1.14576 |
| C | -4.8071  | 0.87182  | -0.16445 |
| C | -5.9874  | 0.14003  | -0.22268 |
| C | -6.21283 | -0.74653 | -1.27492 |
| H | -5.42767 | -1.56105 | -3.10475 |
| H | -3.30036 | -0.29609 | -2.96818 |
| H | -4.64014 | 1.57717  | 0.64701  |
| H | -6.73879 | 0.26389  | 0.55153  |
| H | -7.13208 | -1.32119 | -1.31697 |
| C | -2.48756 | 1.34833  | -0.99282 |
| C | -2.28866 | 2.65899  | -0.76718 |
| C | -3.29275 | 3.74844  | -0.69042 |
| C | -3.12814 | 4.7521   | 0.27248  |
| C | -4.40966 | 3.80914  | -1.53268 |
| C | -4.06591 | 5.76881  | 0.41988  |
| H | -2.25232 | 4.7309   | 0.91938  |
| C | -5.34098 | 4.8326   | -1.39689 |
| H | -4.54408 | 3.04568  | -2.29251 |
| C | -5.17832 | 5.81018  | -0.41659 |
| H | -3.92634 | 6.52998  | 1.1811   |
| H | -6.19912 | 4.86814  | -2.06012 |
| H | -5.91084 | 6.60336  | -0.31089 |
| C | -0.91381 | 0.7817   | -3.63347 |
| H | -1.92542 | 1.18346  | -3.58034 |
| H | -0.19596 | 1.60386  | -3.69744 |
| H | -0.81064 | 0.148    | -4.51739 |
| H | -0.9787  | 0.59934  | -1.49825 |
| O | -0.61212 | -0.08558 | -2.39719 |

**TS3:**

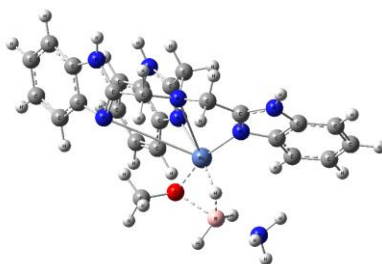

| <b>TS3</b>                                     |                     |
|------------------------------------------------|---------------------|
| <b>SCF Done: E (RM062X)</b>                    | <b>-1676.938564</b> |
| <b>SCF done for solvent</b>                    | <b>-1677.494845</b> |
| <b>Thermal correction to Gibbs Free Energy</b> | <b>0.479020</b>     |
| <b>Temperature</b>                             | <b>328.15 K</b>     |

**Coordinates**

|    |          |          |          |
|----|----------|----------|----------|
| Ni | 1.27979  | 0.80937  | -0.52363 |
| N  | 0.47562  | -1.97461 | -1.07318 |
| N  | -2.23537 | -0.5813  | -1.45954 |
| N  | -2.84608 | -2.67087 | -0.94495 |
| H  | -2.86438 | -3.67784 | -1.01186 |
| N  | -0.04999 | 0.19017  | 0.80366  |
| N  | -1.57792 | -1.09919 | 1.74074  |
| H  | -2.12598 | -1.92808 | 1.92069  |
| N  | 2.66942  | -0.53023 | -0.13229 |
| N  | 4.03814  | -2.24816 | -0.3316  |
| H  | 4.37699  | -3.15715 | -0.61098 |
| C  | -0.58818 | -2.36169 | -2.00504 |
| H  | -0.64807 | -3.45891 | -2.11933 |
| H  | -0.36133 | -1.92906 | -2.98366 |
| C  | -1.9109  | -1.84095 | -1.5248  |
| C  | -3.87268 | -1.8617  | -0.49063 |
| C  | -5.05985 | -2.13278 | 0.19294  |
| H  | -5.37179 | -3.14475 | 0.42897  |
| C  | -5.829   | -1.03548 | 0.54959  |
| H  | -6.76352 | -1.19481 | 1.07686  |
| C  | -5.43144 | 0.28083  | 0.23928  |
| H  | -6.06497 | 1.10687  | 0.54359  |
| C  | -4.25485 | 0.54017  | -0.44194 |
| H  | -3.94268 | 1.55318  | -0.67409 |
| C  | -3.46225 | -0.55288 | -0.81434 |
| C  | 0.15473  | -2.24741 | 0.32449  |
| H  | -0.50691 | -3.11881 | 0.44375  |

|   |          |          |          |
|---|----------|----------|----------|
| H | 1.07547  | -2.47207 | 0.87134  |
| C | -0.47891 | -1.04327 | 0.95683  |
| C | -1.91015 | 0.1957   | 2.10748  |
| C | -2.95991 | 0.71707  | 2.86179  |
| H | -3.72063 | 0.08034  | 3.29972  |
| C | -2.98867 | 2.09474  | 3.00031  |
| H | -3.78669 | 2.55318  | 3.57404  |
| C | -2.00887 | 2.91881  | 2.41075  |
| H | -2.07579 | 3.99281  | 2.54685  |
| C | -0.96944 | 2.39454  | 1.66093  |
| H | -0.22554 | 3.02328  | 1.18294  |
| C | -0.93155 | 1.00376  | 1.5112   |
| C | 1.78973  | -2.44454 | -1.46672 |
| H | 1.93712  | -2.20293 | -2.52634 |
| H | 1.92723  | -3.53596 | -1.35799 |
| C | 2.82753  | -1.72961 | -0.64848 |
| C | 4.72711  | -1.30736 | 0.42369  |
| C | 5.99737  | -1.29914 | 0.99965  |
| H | 6.67647  | -2.13925 | 0.90935  |
| C | 6.34874  | -0.15154 | 1.69233  |
| H | 7.32705  | -0.09449 | 2.15657  |
| C | 5.47349  | 0.94709  | 1.80763  |
| H | 5.7996   | 1.82393  | 2.35586  |
| C | 4.21304  | 0.93148  | 1.23643  |
| H | 3.53551  | 1.77631  | 1.31448  |
| C | 3.84661  | -0.22283 | 0.53984  |
| C | -0.92322 | 2.72849  | -2.49652 |
| H | -1.69774 | 2.47966  | -1.76965 |
| H | -1.14841 | 3.64355  | -3.04765 |
| H | -0.79009 | 1.8813   | -3.17648 |
| O | 0.29125  | 2.98055  | -1.76396 |
| B | 1.81839  | 3.38667  | -2.87498 |
| H | 2.81087  | 1.42723  | -1.97773 |
| H | 1.72738  | 3.15087  | -4.0481  |
| H | 2.52497  | 4.27064  | -2.4792  |
| N | 1.76487  | 5.49385  | -4.59883 |
| H | 1.16476  | 6.29847  | -4.43869 |
| H | 1.87516  | 5.41414  | -5.60876 |
| H | 2.68388  | 5.7199   | -4.2289  |

TS1':

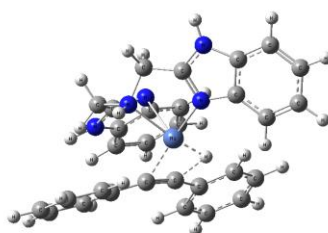

| <b>TS1'</b>                                    |                     |
|------------------------------------------------|---------------------|
| <b>SCF Done: E (RM062X)</b>                    | <b>-1600.716218</b> |
| <b>SCF done for solvent</b>                    | <b>-1601.224506</b> |
| <b>Thermal correction to Gibbs Free Energy</b> | <b>0.440622</b>     |
| <b>Temperature</b>                             | <b>328.15 K</b>     |

**Coordinates**

|    |          |          |          |
|----|----------|----------|----------|
| Ni | -0.16361 | 0.14457  | -0.16143 |
| N  | -0.28154 | 1.43699  | 1.65546  |
| N  | 1.80882  | -0.48078 | 1.99326  |
| N  | 3.35945  | 1.08461  | 1.6347   |
| H  | 3.73686  | 2.00472  | 1.46243  |
| N  | -1.6566  | -0.74769 | 0.73588  |
| N  | -2.88891 | -1.03483 | 2.54814  |
| H  | -3.17109 | -0.98131 | 3.51522  |
| C  | 1.04444  | 1.89339  | 2.1246   |
| H  | 0.99322  | 2.23676  | 3.16925  |
| H  | 1.34472  | 2.7466   | 1.50788  |
| C  | 2.06252  | 0.8007   | 1.95146  |
| C  | 3.99216  | -0.12349 | 1.40609  |
| C  | 5.2872   | -0.44987 | 0.99892  |
| H  | 6.0441   | 0.30771  | 0.8255   |
| C  | 5.55675  | -1.79845 | 0.83112  |
| H  | 6.54712  | -2.1041  | 0.5109   |
| C  | 4.5786   | -2.78533 | 1.06868  |
| H  | 4.8362   | -3.82788 | 0.91687  |
| C  | 3.30079  | -2.45262 | 1.48252  |
| H  | 2.54218  | -3.20723 | 1.65878  |
| C  | 3.00376  | -1.09525 | 1.64712  |
| C  | -0.8894  | 0.53759  | 2.67151  |
| H  | -0.08617 | -0.03427 | 3.14252  |
| H  | -1.41528 | 1.11816  | 3.44441  |
| C  | -1.81403 | -0.42272 | 1.99547  |
| C  | -3.47809 | -1.81596 | 1.55849  |
| C  | -4.61235 | -2.62583 | 1.55121  |
| H  | -5.21477 | -2.78107 | 2.43936  |
| C  | -4.93236 | -3.22308 | 0.34186  |
| H  | -5.80759 | -3.86083 | 0.28491  |
| C  | -4.15538 | -3.02026 | -0.81466 |
| H  | -4.45503 | -3.5004  | -1.73973 |
| C  | -3.02587 | -2.21883 | -0.79943 |
| H  | -2.43178 | -2.0347  | -1.68854 |
| C  | -2.68944 | -1.61721 | 0.41438  |
| H  | -0.15713 | -0.86379 | -1.18608 |
| C  | 1.33599  | 4.672    | -1.2657  |
| C  | 0.92956  | 3.33992  | -1.2791  |
| C  | 1.8821   | 2.31856  | -1.16845 |

|   |          |          |          |
|---|----------|----------|----------|
| C | 3.2453   | 2.64901  | -1.08598 |
| C | 3.64043  | 3.9814   | -1.07224 |
| C | 2.68556  | 4.99611  | -1.15057 |
| H | 0.59518  | 5.45931  | -1.36139 |
| H | -0.11721 | 3.07121  | -1.39475 |
| H | 3.97848  | 1.84806  | -1.03599 |
| H | 4.69508  | 4.23099  | -1.01501 |
| H | 2.99745  | 6.03512  | -1.14258 |
| C | 1.49485  | 0.92639  | -1.15095 |
| C | 1.5622   | -0.30702 | -1.31482 |
| C | 2.14935  | -1.59689 | -1.61259 |
| C | 1.49219  | -2.8094  | -1.38145 |
| C | 3.46247  | -1.59904 | -2.10499 |
| C | 2.1367   | -4.00963 | -1.65629 |
| H | 0.48605  | -2.80404 | -0.97279 |
| C | 4.09745  | -2.80303 | -2.37836 |
| H | 3.97333  | -0.65521 | -2.26814 |
| C | 3.43607  | -4.00985 | -2.15716 |
| H | 1.62282  | -4.9481  | -1.47696 |
| H | 5.1122   | -2.79915 | -2.76209 |
| H | 3.93498  | -4.94914 | -2.37178 |
| H | -0.88056 | 2.21596  | 1.47005  |



## 11. Spectral Data for alkynes and chalcones

### (Z)-1,2-diphenylethene (1b):<sup>1</sup>

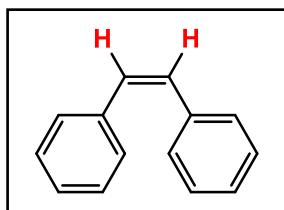

Purified by column chromatography using silica gel and hexane as eluent 89% (80.1mg) isolated yield; colourless oil.  $^1\text{H NMR}$  (400 MHz,  $\text{CDCl}_3$ ):  $\delta$  = 7.29 – 7.19 (m, 10H), 6.62 (s, 2H).  $^{13}\text{C}\{^1\text{H}\}$  NMR (125 MHz,  $\text{CDCl}_3$ ):  $\delta$  137.4, 130.4, 129.0, 128.3, 127.2.

### (Z)-1-methyl-4-styrylbenzene (2b):<sup>14</sup>

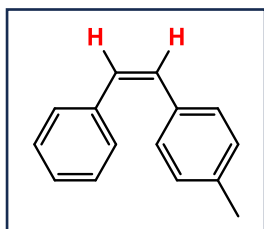

Purified by column chromatography using silica gel and hexane as eluent 95% (92.15 mg) isolated yield; colourless oil.  $^1\text{H NMR}$  (400 MHz,  $\text{CDCl}_3$ ):  $\delta$  7.30 – 7.18 (m, 5H), 7.15 (d,  $J$  = 8.2 Hz, 2H), 7.03 (d,  $J$  = 7.8 Hz, 2H), 6.56 (s, 2H), 2.32 (s, 3H).  $^{13}\text{C}\{^1\text{H}\}$  NMR (125 MHz,  $\text{CDCl}_3$ ):  $\delta$  137.6, 136.9, 134.4, 130.3, 129.6, 129.0, 128.9, 128.9, 128.3, 127.0, 21.3.

### (Z)-1-methoxy-4-styrylbenzene (3b):<sup>15</sup>

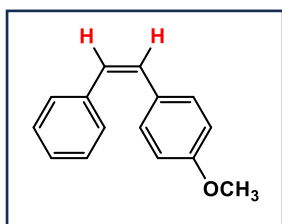

Purified by column chromatography using silica gel and ethyl acetate-hexane as eluent 92% (96.6 mg) isolated yield; yellow oil.  $^1\text{H NMR}$  (500 MHz,  $\text{CDCl}_3$ ):  $\delta$  7.33 – 7.25 (m, 4H), 7.25 – 7.19 (m, 3H), 6.81 – 6.77 (m, 2H), 6.56 (s, 2H), 3.82 (s, 3H).  $^{13}\text{C}\{^1\text{H}\}$  NMR (125 MHz,  $\text{CDCl}_3$ ):  $\delta$  158.8, 137.8, 130.3, 129.9, 129.0, 128.9, 128.4, 127.0, 113.7, 55.3.

### (Z)-1-styryl-4-(trifluoromethyl)benzene (4b):<sup>16</sup>

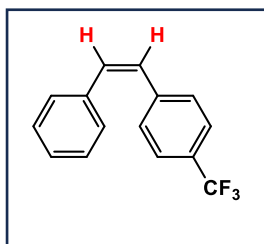

Purified by column chromatography using silica gel and ethyl acetate-hexane as eluent 80% (99.3 mg) isolated yield; yellow oil.  $^1\text{H NMR}$  (400 MHz,  $\text{CDCl}_3$ ):  $\delta$  7.46 (d,  $J$  = 7.9 Hz, 2H), 7.32 (d,  $J$  = 8.1 Hz, 2H), 7.27 – 7.17 (m, 5H), 6.71 (d,  $J$  = 12.2 Hz, 1H), 6.58 (d,  $J$  = 12.1 Hz, 1H).  $^{13}\text{C}\{^1\text{H}\}$  NMR (100 MHz,  $\text{CDCl}_3$ ):  $\delta$  141.0, 136.7, 132.4, 129.3, 129.0, 128.9, 128.6, 128.5 (q,  $J_{\text{C,F}}$  = 22.9 Hz), 127.7, 125.3 (q,  $J_{\text{C,F}}$  = 3.8 Hz), 124.3 (q,  $J_{\text{C,F}}$  = 271.6 Hz).  $^{19}\text{F}\{^1\text{H}\}$  NMR (470 MHz,  $\text{CDCl}_3$ ):  $\delta$  -62.4.

**(Z)-1-fluoro-4-styrylbenzene (5b):**<sup>15</sup>

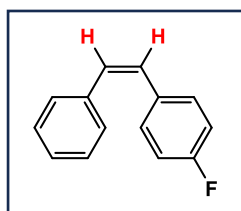

Purified by column chromatography using silica gel and ethyl acetate-hexane as eluent 74% (73.4 mg) isolated yield; colourless oil. <sup>1</sup>H NMR (500 MHz, CDCl<sub>3</sub>): δ 7.26 – 7.16 (m, 7H), 6.91 (t, J = 8.7 Hz, 2H), 6.60 (d, J = 12.2 Hz, 1H), 6.55 (d, J = 12.2 Hz, 1H). <sup>13</sup>C{<sup>1</sup>H} NMR (125 MHz, CDCl<sub>3</sub>): δ 161.9 (d, J<sub>C,F</sub> = 245 Hz), 137.2, 133.3 (d, J<sub>C,F</sub> = 3.7 Hz), 130.6 (d, J<sub>C,F</sub> = 8.3 Hz), 130.4, 129.2, 129.0, 128.4, 127.3, 115.3 (d, J<sub>C,F</sub> = 21.2 Hz). <sup>19</sup>F{<sup>1</sup>H} NMR (470 MHz, CDCl<sub>3</sub>): δ -114.6.

**(Z)-1-chloro-4-styrylbenzene (6b):**<sup>15</sup>

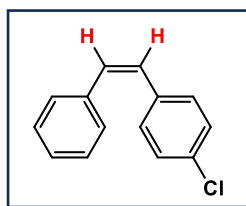

Purified by column chromatography using silica gel and ethyl acetate-hexane as eluent 82% (88.1 mg) isolated yield; colourless oil. <sup>1</sup>H NMR (500 MHz, CDCl<sub>3</sub>): δ 7.35 – 7.14 (m, 9H), 6.64 (d, J = 12.2 Hz, 1H), 6.54 (d, J = 12.2 Hz, 1H). <sup>13</sup>C{<sup>1</sup>H} NMR (125 MHz, CDCl<sub>3</sub>): δ 137.0, 135.8, 132.9, 131.1, 129.1, 128.9, 128.5, 128.5, 127.5, 126.8.

**(Z)-1-bromo-4-styrylbenzene (7b):**<sup>15</sup>

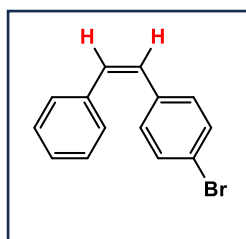

Purified by column chromatography using silica gel and ethyl acetate-hexane as eluent 77% (99.8 mg) isolated yield; yellow oil. <sup>1</sup>H NMR (500 MHz, CDCl<sub>3</sub>): δ 7.35 (s, 2H), 7.26 – 7.21 (m, 5H), 7.11 (d, J = 8.5 Hz, 2H), 6.64 (d, J = 12.2 Hz, 1H), 6.51 (d, J = 12.2 Hz, 1H). <sup>13</sup>C{<sup>1</sup>H} NMR (125 MHz, CDCl<sub>3</sub>): δ 136.3, 131.5, 131.2, 130.7, 129.1, 128.9, 128.5, 127.5, 121.1.

**(Z)-(4-styrylphenyl)methanol (8b):**<sup>15</sup>

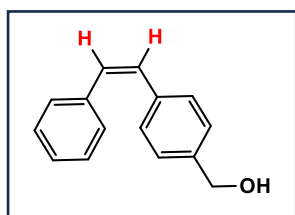

Purified by column chromatography using silica gel and ethyl acetate-hexane as eluent 81% (85.1 mg) isolated yield; brown oil. <sup>1</sup>H NMR (400 MHz, CDCl<sub>3</sub>): δ 7.33 – 7.09 (m, 9H), 6.61 (d, J = 12.2 Hz, 1H), 6.58 (d, J = 12.2 Hz, 1H), 4.65 (s, 2H), 1.71 (s, 1H). <sup>13</sup>C{<sup>1</sup>H} NMR (100 MHz, CDCl<sub>3</sub>): δ 139.8, 137.3, 136.8, 130.5, 130.0, 129.2, 129.0, 128.4, 127.3, 127.0, 65.3.

**methyl (Z)-4-styrylbenzoate (9b):**<sup>1</sup>

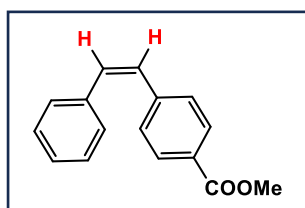

Purified by column chromatography using silica gel and ethyl acetate-hexane as eluent 79% (94.1 mg) isolated yield; yellow oil. <sup>1</sup>H NMR (400 MHz, CDCl<sub>3</sub>): δ 7.92 – 7.87 (m, 2H), 7.31 (d, J = 8.2 Hz, 2H), 7.25 – 7.19 (m, 5H), 6.71 (d, J = 12.2 Hz, 1H), 6.61 (d, J = 12.2 Hz, 1H), 3.90 (s, 3H). <sup>13</sup>C{<sup>1</sup>H} NMR (125 MHz, CDCl<sub>3</sub>): δ 167.0, 142.2, 136.8, 132.4, 129.7, 129.4, 129.0, 128.7, 128.5, 127.6, 52.2.

**ethyl (Z)-4-styrylbenzoate (10b):**<sup>17</sup>

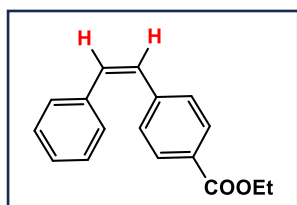

Purified by column chromatography using silica gel and ethyl acetate-hexane as eluent 76% (95.8 mg) isolated yield; yellow oil. <sup>1</sup>H NMR (400 MHz, CDCl<sub>3</sub>): δ 7.90 (d, J = 8.4 Hz, 2H), 7.30 (d, J = 8.1 Hz, 2H), 7.22 (s, 5H), 6.71 (d, J = 12.2 Hz, 1H), 6.61 (d, J = 12.2 Hz, 1H), 4.36 (q, J = 7.1 Hz, 2H), 1.38 (t, J = 7.3 Hz, 3H). <sup>13</sup>C{<sup>1</sup>H} NMR (100 MHz, CDCl<sub>3</sub>): δ 166.6, 142.1, 136.8, 132.3, 129.6, 129.4, 129.0, 129.0, 128.5, 127.6, 61.0, 14.5.

**(Z)-2-(4-styrylphenyl)acetonitrile (11b):**<sup>18</sup>

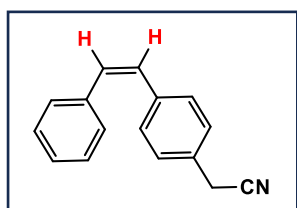

Purified by column chromatography using silica gel and ethyl acetate-hexane as eluent 70% (76.7 mg) isolated yield; yellow oil. <sup>1</sup>H NMR (400 MHz, CDCl<sub>3</sub>): δ 7.29 – 7.20 (m, 7H), 7.18 (d, J = 8.2 Hz, 2H), 6.65 (d, J = 12.2 Hz, 1H), 6.57 (d, J = 12.2 Hz, 1H), 3.71 (s, 2H). <sup>13</sup>C{<sup>1</sup>H} NMR (125 MHz, CDCl<sub>3</sub>): δ 137.3, 137.1, 131.2, 129.8, 129.4, 128.9, 128.6, 128.5, 128.0, 127.5, 118.0, 23.5.

**(Z)-1-(tert-butyl)-4-styrylbenzene (12b):**<sup>15</sup>

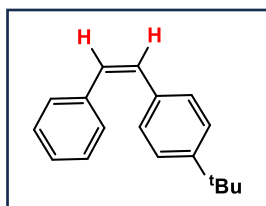

Purified by column chromatography using silica gel and hexane as eluent 83% (98.1 mg) isolated yield; colourless oil. <sup>1</sup>H NMR (500 MHz, CDCl<sub>3</sub>): δ 7.35 – 7.18 (m, 9H), 6.57 (s, 2H), 1.31 (s, 9H). <sup>13</sup>C{<sup>1</sup>H} NMR (125 MHz, CDCl<sub>3</sub>): δ 150.3, 137.8, 134.3, 130.3, 129.7, 129.0, 128.7, 128.4, 127.1, 125.2, 34.7, 31.4.

**(Z)-1,3-dimethyl-5-styrylbenzene (13b):**<sup>15</sup>

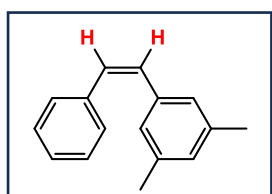

Purified by column chromatography using silica gel and hexane as eluent 82% (85.4 mg) isolated yield; colourless oil. <sup>1</sup>H NMR (400 MHz, CDCl<sub>3</sub>): δ 7.29 – 7.23 (m, 3H), 7.21 (d, J = 8.3 Hz, 2H), 6.88 (s, 2H), 6.84 (s, 1H), 6.55 (s, 2H), 2.21 (s, 6H). <sup>13</sup>C{<sup>1</sup>H} NMR (125 MHz, CDCl<sub>3</sub>): δ 137.8, 137.3, 130.6, 130.0, 129.0, 128.9, 128.2, 127.2, 126.7, 21.3.

**(Z)-1-methyl-2-styrylbenzene (14b):**<sup>15</sup>

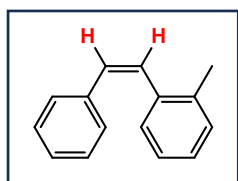

Purified by column chromatography using silica gel and hexane as eluent 89% (86.4 mg) isolated yield; colourless oil. <sup>1</sup>H NMR (400 MHz, CDCl<sub>3</sub>): δ 7.21 – 7.02 (m, 9H), 6.68 – 6.59 (m, 2H), 2.28 (s, 3H). <sup>13</sup>C{<sup>1</sup>H} NMR (100 MHz, CDCl<sub>3</sub>): δ 137.2, 136.2, 131.7, 130.6, 130.2, 129.7, 129.1, 129.0, 128.2, 127.4, 127.2, 125.8, 20.0.

**(Z)-2-styryl-1,1'-biphenyl (15b):**<sup>18</sup>

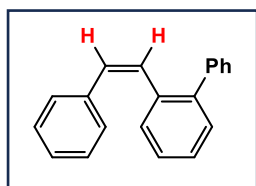

Purified by column chromatography using silica gel and hexane as eluent 78% (99.9 mg) isolated yield; colourless oil. <sup>1</sup>H NMR (500 MHz, CDCl<sub>3</sub>): δ 7.47 – 7.44 (m, 2H), 7.40 – 7.27 (m, 8H), 7.23 – 7.14 (m, 4H), 6.52 (d, J = 12.2 Hz, 1H), 6.43 (d, J = 12.1 Hz, 1H). <sup>13</sup>C{<sup>1</sup>H} NMR (125 MHz, CDCl<sub>3</sub>): δ 141.3, 137.2, 135.9, 131.7, 130.6, 130.1, 130.1, 129.6, 129.1, 128.3, 128.2, 127.6, 127.2, 127.2, 77.4, 77.2, 76.9.

**(Z)-1-methoxy-2-styrylbenzene (16b):**<sup>19</sup>

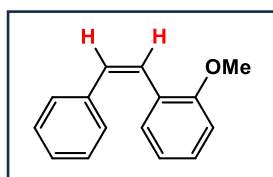

Purified by column chromatography using silica gel and ethyl acetate-hexane as eluent 90% (94.6 mg) isolated yield; yellow oil. <sup>1</sup>H NMR (500 MHz, CDCl<sub>3</sub>): δ 7.28 – 7.13 (m, 7H), 6.91 (dd, J = 8.4, 1.1 Hz, 1H), 6.77 (td, J = 7.5, 1.1 Hz, 1H), 6.71 (d, J = 12.2 Hz, 1H), 6.65 (d, J = 12.2 Hz, 1H), 3.84 (s, 3H). <sup>13</sup>C{<sup>1</sup>H} NMR (125 MHz, CDCl<sub>3</sub>): δ 157.4, 137.5, 130.4, 130.3, 129.0, 128.7, 128.6, 128.2, 127.0, 126.0, 120.4, 110.8, 55.6.

**(Z)-2-styrylaniline (17b):**<sup>18</sup>

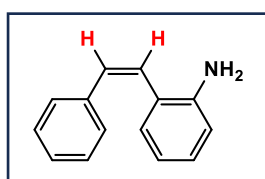

Purified by column chromatography using silica gel and ethyl acetate-hexane as eluent 83% (81.1 mg) isolated yield; yellow oil. <sup>1</sup>H NMR (400 MHz, CDCl<sub>3</sub>): δ 7.24 – 7.16 (m, 5H), 7.09 (t, J = 7.6 Hz, 2H), 6.70 (dd, J = 7.7, 4.0 Hz, 2H), 6.66 (d, J = 12.2 Hz, 1H), 6.52 (d, J = 12.2 Hz, 1H), 3.70 (s, 2H). <sup>13</sup>C{<sup>1</sup>H} NMR (100 MHz, CDCl<sub>3</sub>): δ 143.8, 136.8, 131.8, 129.7, 128.9, 128.5, 128.3, 127.6, 126.6, 123.3, 118.6, 115.7.

**(Z)-2-styrylpyridine (18b):**<sup>20</sup>

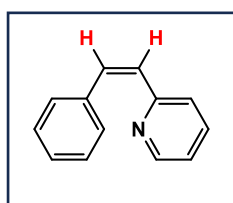

Purified by column chromatography using silica gel and ethyl acetate-hexane as eluent 81% (73.3 mg) isolated yield; yellow oil. <sup>1</sup>H NMR (500 MHz, CDCl<sub>3</sub>): δ 8.59 (d, J = 4.9 Hz, 1H), 7.44 (td, J = 7.7, 1.7 Hz, 1H), 7.31 – 7.19 (m, 5H), 7.16 (d, J = 7.9 Hz, 1H), 7.09 (ddd, J = 7.5, 4.8, 1.2 Hz, 1H), 6.84 (d, J = 12.2 Hz, 1H), 6.70 (d, J = 12.2 Hz, 1H). <sup>13</sup>C{<sup>1</sup>H} NMR (125 MHz, CDCl<sub>3</sub>): δ 156.4, 149.6, 136.8, 135.9, 133.5, 130.5, 129.0, 128.4, 127.8, 124.0, 121.9.

**(Z)-1-methyl-3-styrylbenzene (19b):**<sup>1</sup>

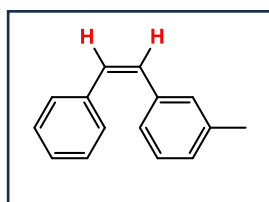

Purified by column chromatography using silica gel and hexane as eluent 90% (87.4 mg) isolated yield; colourless oil. <sup>1</sup>H NMR (400 MHz, CDCl<sub>3</sub>): δ 7.28 – 7.18 (m, 5H), 7.09 (dd, J = 12.3, 7.4 Hz, 3H), 7.01 (d, J = 7.3 Hz, 1H), 6.58 (s, 2H), 2.27 (s, 3H). <sup>13</sup>C{<sup>1</sup>H} NMR (125 MHz, CDCl<sub>3</sub>): δ 137.9, 137.5, 137.3, 130.5, 130.2, 129.7, 129.0, 128.3, 128.2, 128.0, 127.2, 126.0, 77.5, 77.2, 76.8, 21.5.

**(Z)-1-methoxy-3-styrylbenzene (20b):**<sup>20</sup>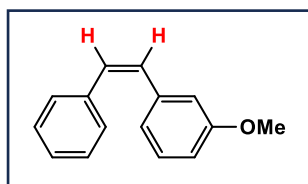

Purified by column chromatography using silica gel and ethyl acetate-hexane as eluent 91% (95.7 mg) isolated yield; yellow oil. <sup>1</sup>H NMR (400 MHz, CDCl<sub>3</sub>): δ 7.28 – 7.12 (m, 6H), 6.84 (d, J = 7.7 Hz, 1H), 6.79 (t, J = 2.1 Hz, 1H), 6.75 (dd, J = 8.1, 2.7 Hz, 1H), 6.62 (d, J = 12.2 Hz, 1H), 6.57 (d, J = 12.2 Hz, 1H), 3.65 (s, 3H). <sup>13</sup>C{<sup>1</sup>H} NMR (125 MHz, CDCl<sub>3</sub>): δ 159.5, 138.7, 137.4, 130.6, 130.3, 129.4, 129.1, 128.4, 127.3, 121.7, 113.9, 113.5, 55.2.

**(Z)-3-phenylprop-2-en-1-ol (21b):**<sup>14</sup>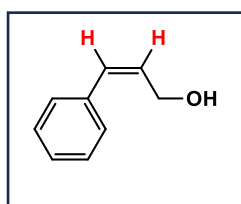

Purified by column chromatography using silica gel and ethyl acetate-hexane as eluent 68% (45.6 mg) isolated yield; yellow oil. <sup>1</sup>H NMR (500 MHz, CDCl<sub>3</sub>): δ 7.35 (dd, J = 8.2, 6.8 Hz, 2H), 7.30 – 7.25 (m, 1H), 7.22 (dd, J = 7.0, 1.7 Hz, 2H), 6.58 (d, J = 11.7 Hz, 1H), 5.88 (dt, J = 11.7, 6.4 Hz, 1H), 4.44 (dd, J = 6.3, 1.7 Hz, 2H). <sup>13</sup>C{<sup>1</sup>H} NMR (125 MHz, CDCl<sub>3</sub>): 136.7, 131.3, 131.2, 128.9, 128.4, 127.4, 59.8.

**1,3-diphenylpropan-1-ol (22d):**<sup>2</sup>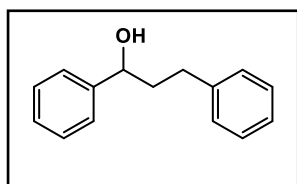

Purified by column chromatography using silica gel and ethyl acetate-hexane as eluent 88% (93.4 mg) isolated yield; colourless oil. <sup>1</sup>H NMR (400 MHz, CDCl<sub>3</sub>) δ 7.35 (d, J = 3.7 Hz, 4H), 7.29 (dd, J = 9.0, 5.9 Hz, 3H), 7.23 – 7.16 (m, 3H), 4.68 (dd, J = 7.9, 5.5 Hz, 1H), 2.77 – 2.64 (m, 2H), 2.16 – 1.99 (m, 3H). <sup>13</sup>C{<sup>1</sup>H} NMR (125 MHz, CDCl<sub>3</sub>): δ 144.7, 141.9, 128.6, 128.6, 128.5, 127.7, 126.0, 126.0, 74.0, 40.6, 32.2.

**3-phenyl-1-(p-tolyl)propan-1-ol (23d):**<sup>21</sup>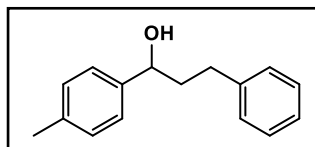

Purified by column chromatography using silica gel and ethyl acetate-hexane as eluent 86% (97.3 mg) isolated yield; colourless oil. <sup>1</sup>H NMR (400 MHz, CDCl<sub>3</sub>) δ 7.27 (t, J = 8.5 Hz, 5H), 7.22–7.17 (m, 4H), 4.67 (t, J = 6.7 Hz, 1H), 2.72 (ddd, J = 25.4, 12.9, 6.5 Hz, 2H), 2.36 (s, 3H), 2.10 (ddd, J = 38.8, 13.1, 6.9 Hz, 3H). <sup>13</sup>C{<sup>1</sup>H} NMR (125 MHz, CDCl<sub>3</sub>): δ 142.0, 141.7, 137.5, 129.3, 128.6, 128.5, 126.0, 126.0, 73.9, 40.5, 32.2, 21.2.

**1-(4-methoxyphenyl)-3-phenylpropan-1-ol (24d):**<sup>21</sup>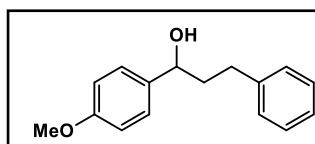

Purified by column chromatography using silica gel and ethyl acetate-hexane as eluent 81% (98.1 mg) isolated yield; colourless oil. <sup>1</sup>H NMR (400 MHz, CDCl<sub>3</sub>) δ 7.29 (dd, J = 8.3, 6.3 Hz, 4H), 7.23–7.15 (m, 3H), 6.94–6.84 (m, 2H), 4.64 (dd, J = 7.7, 5.7 Hz, 1H), 3.82 (s, 3H), 2.76–2.62 (m, 2H), 2.22–1.90 (m, 3H). <sup>13</sup>C{<sup>1</sup>H} NMR (125 MHz, CDCl<sub>3</sub>): δ 159.2, 142.0, 136.8, 128.6, 128.5, 127.3, 126.0, 114.0, 73.6, 55.4, 40.4, 32.2.

### 1-(4-fluorophenyl)-3-phenylpropan-1-ol (25d):<sup>22</sup>

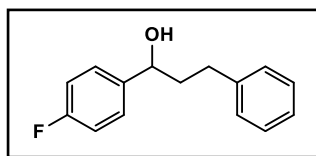

Purified by column chromatography using silica gel and ethyl acetate-hexane as eluent 89% (102.4 mg) isolated yield; colourless oil. <sup>1</sup>H NMR (400 MHz, CDCl<sub>3</sub>) δ 7.31 (dt, *J* = 14.3, 7.2 Hz, 5H), 7.19 (d, *J* = 7.4 Hz, 3H), 7.04 (t, *J* = 8.5 Hz, 2H), 4.69 (t, *J* = 6.7 Hz, 1H), 2.71 (ddt, *J* = 23.8, 15.3, 7.7 Hz, 2H), 2.20 – 1.93 (m, 3H). <sup>13</sup>C{<sup>1</sup>H} NMR (125 MHz, CDCl<sub>3</sub>): δ 162.3 (d, *J*<sub>C,F</sub> = 245.5 Hz), 141.7, 140.4 (d, *J*<sub>C,F</sub> = 3 Hz), 128.6, 128.5, 127.6 (d, *J*<sub>C,F</sub> = 8 Hz), 126.1, 115.4 (d, *J*<sub>C,F</sub> = 21.3 Hz), 73.4, 40.7, 32.1. <sup>19</sup>F{<sup>1</sup>H} NMR (470 MHz, CDCl<sub>3</sub>): δ -114.9.

### 1-(4-chlorophenyl)-3-phenylpropan-1-ol (26d):<sup>22</sup>

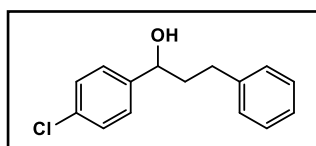

Purified by column chromatography using silica gel and ethyl acetate-hexane as eluent 88% (108.56 mg) isolated yield; colourless oil. <sup>1</sup>H NMR (400 MHz, CDCl<sub>3</sub>) δ 7.31 (dt, *J* = 18.6, 9.6 Hz, 7H), 7.18 (d, *J* = 8.3 Hz, 2H), 4.67 (t, *J* = 7.0 Hz, 1H), 2.69 (td, *J* = 14.8, 7.5 Hz, 2H), 2.27–1.92 (m, 3H). <sup>13</sup>C{<sup>1</sup>H} NMR (125 MHz, CDCl<sub>3</sub>): δ 143.2, 141.6, 133.4, 128.8, 128.6, 128.6, 127.4, 126.1, 73.3, 40.6, 32.1.

### 3-phenyl-1-(4-(trifluoromethyl)phenyl)propan-1-ol (27d):<sup>2</sup>

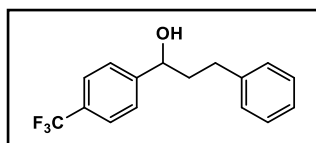

Purified by column chromatography using silica gel and ethyl acetate-hexane as eluent 92% (128.9 mg) isolated yield; colourless oil. <sup>1</sup>H NMR (400 MHz, CDCl<sub>3</sub>) δ 7.62 (d, *J* = 8.0 Hz, 2H), 7.47 (d, *J* = 8.0 Hz, 2H), 7.34 – 7.27 (m, 2H), 7.20 (d, *J* = 7.6 Hz, 3H), 4.77 (dd, *J* = 7.9, 5.0 Hz, 1H), 2.81–2.67 (m, 2H), 2.18 – 1.97 (m, 3H). <sup>13</sup>C{<sup>1</sup>H} NMR (100 MHz, CDCl<sub>3</sub>): δ 148.7, 141.5, 130.8 (q, *J*<sub>C,F</sub> = 32.6 Hz), 128.6, 128.5, 128.3, 126.2, 125.6 (q, *J*<sub>C,F</sub> = 3.8 Hz), 124.1 (q, *J*<sub>C,F</sub> = 271.4 Hz), 73.3, 40.7, 32.0. <sup>19</sup>F{<sup>1</sup>H} NMR (470 MHz, CDCl<sub>3</sub>): δ -62.3.

### 1-(3-chlorophenyl)-3-phenylpropan-1-ol (28d):<sup>23</sup>

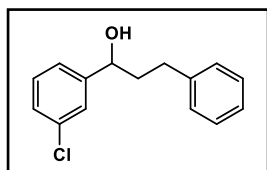

Purified by column chromatography using silica gel and ethyl acetate-hexane as eluent 80% (98.7 mg) isolated yield; colourless oil. <sup>1</sup>H NMR (400 MHz, CDCl<sub>3</sub>) δ 7.36 (s, 1H), 7.29 (dd, *J* = 13.1, 6.9 Hz, 4H), 7.20 (d, *J* = 8.1 Hz, 4H), 4.67 (s, 1H), 2.73 (tt, *J* = 14.6, 7.2 Hz, 2H), 2.05 (ddq, *J* = 29.1, 13.8, 6.7 Hz, 3H). <sup>13</sup>C{<sup>1</sup>H} NMR (100 MHz, CDCl<sub>3</sub>): δ 146.8, 141.6, 134.5, 129.9, 128.6, 127.8, 126.2, 126.1, 124.2, 73.3, 40.6, 32.0.

### 1-mesityl-3-phenylpropan-1-ol (29d):<sup>2</sup>

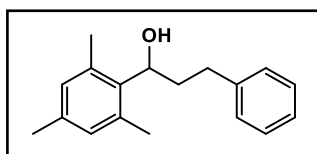

Purified by column chromatography using silica gel and ethyl acetate-hexane as eluent 79% (100 mg) isolated yield; colourless oil. <sup>1</sup>H NMR (500 MHz, CDCl<sub>3</sub>) δ 7.33–7.28 (m, 2H), 7.26–7.18 (m, 3H), 6.82 (s, 2H), 5.14 (dd, *J* = 9.3, 4.7 Hz, 1H), 2.91 (ddd, *J* = 14.3, 9.6, 5.0 Hz, 1H), 2.70 (ddd, *J* = 13.8, 9.3, 7.3 Hz, 1H), 2.41–2.37 (m, 1H), 2.35 (s, 6H), 2.26 (s, 3H), 2.02–1.95 (m, 1H), 1.73

(s, 1H).  $^{13}\text{C}\{^1\text{H}\}$  NMR (125 MHz,  $\text{CDCl}_3$ ):  $\delta$  142.0, 136.9, 136.1, 130.3, 128.6, 128.5, 126.0, 70.7, 37.2, 32.9, 20.8, 20.7.

### 3-phenyl-1-(pyridin-3-yl)propan-1-ol (30d):<sup>2</sup>

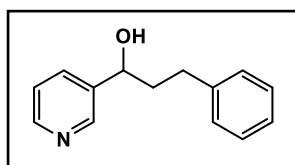

Purified by column chromatography using silica gel and ethyl acetate-hexane as eluent 83% (88.5 mg) isolated yield; colourless oil.  $^1\text{H}$  NMR (400 MHz,  $\text{CDCl}_3$ ).  $\delta$  8.38 (s, 1H), 8.34 (d,  $J = 4.9$  Hz, 1H), 7.70 (d,  $J = 7.6$  Hz, 1H), 7.30 – 7.14 (m, 6H), 4.68 (dd,  $J = 8.2, 5.2$  Hz, 1H), 4.42 (s, 1H), 2.71 (dddd,  $J = 20.8, 14.1, 9.8, 5.8$  Hz, 2H), 2.12 (ddd,  $J = 16.7, 8.2, 4.0$  Hz, 1H), 1.99 (ddd,  $J = 14.4, 9.6, 5.2$  Hz, 1H).  $^{13}\text{C}\{^1\text{H}\}$  NMR (100 MHz,  $\text{CDCl}_3$ ):  $\delta$  148.3, 147.6, 141.5, 140.7, 134.1, 128.5, 128.5, 126.0, 123.7, 71.0, 40.6, 32.0.

### 3-phenyl-1-(thiophen-2-yl)propan-1-ol (31d):<sup>24</sup>

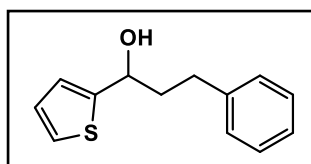

Purified by column chromatography using silica gel and ethyl acetate-hexane as eluent 80% (87.3 mg) isolated yield; colourless oil.  $^1\text{H}$  NMR (400 MHz,  $\text{CDCl}_3$ ).  $\delta$  7.34–7.28 (m, 3H), 7.21 (d,  $J = 6.9$  Hz, 4H), 7.11 (d,  $J = 5.0$  Hz, 1H), 4.80 (t,  $J = 6.6$  Hz, 1H), 2.84–2.67 (m, 2H), 2.20–2.06 (m, 2H), 1.87 (s, 1H).  $^{13}\text{C}\{^1\text{H}\}$  NMR (100 MHz,  $\text{CDCl}_3$ ):  $\delta$  146.1, 141.8, 128.6, 128.6, 126.4, 126.0, 125.8, 121.1, 70.0, 39.9, 32.1.

### 1-phenyl-3-(p-tolyl)propan-1-ol (32d):<sup>23</sup>

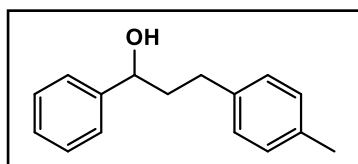

Purified by column chromatography using silica gel and ethyl acetate-hexane as eluent 84% (95.1 mg) isolated yield; colourless oil.  $^1\text{H}$  NMR (400 MHz,  $\text{CDCl}_3$ ).  $\delta$  7.37 (d,  $J = 4.3$  Hz, 4H), 7.31–7.28 (m, 1H), 7.10 (s, 4H), 4.70 (dd,  $J = 7.8, 5.4$  Hz, 1H), 2.69 (ddd,  $J = 18.3, 9.3, 6.0$  Hz, 2H), 2.33 (m, 3H), 2.21 – 1.91 (m, 3H).  $^{13}\text{C}\{^1\text{H}\}$  NMR (125 MHz,  $\text{CDCl}_3$ ):  $\delta$  144.7, 138.8, 135.4, 129.2, 128.6, 128.4, 127.8, 126.1, 74.1, 40.7, 31.7, 21.1.

### 3-(4-chlorophenyl)-1-phenylpropan-1-ol (33d):<sup>24</sup>

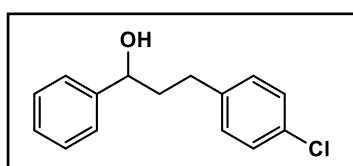

Purified by column chromatography using silica gel and ethyl acetate-hexane as eluent 83% (102 mg) isolated yield; colourless oil.  $^1\text{H}$  NMR (400 MHz,  $\text{CDCl}_3$ ).  $\delta$  7.36 (s, 4H), 7.30 (s, 1H), 7.26 (d,  $J = 8.9$  Hz, 2H), 7.13 (d,  $J = 8.1$  Hz, 2H), 4.68 (t,  $J = 7.0$  Hz, 1H), 2.71 (dt,  $J = 25.6, 8.2$  Hz, 2H), 2.06 (dp,  $J = 38.1, 7.2$  Hz, 3H).  $^{13}\text{C}\{^1\text{H}\}$  NMR (125 MHz,  $\text{CDCl}_3$ ):  $\delta$  144.5, 140.4, 131.7, 129.9, 128.7, 128.7, 128.6, 127.9, 126.0, 73.9, 40.5, 31.5.

### 3-(4-bromophenyl)-1-phenylpropan-1-ol (34d):<sup>24</sup>

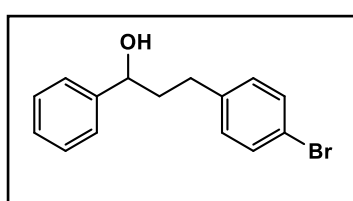

Purified by column chromatography using silica gel and ethyl acetate-hexane as eluent 78% (113.1 mg) isolated yield; colourless oil.  $^1\text{H}$  NMR (400 MHz,  $\text{CDCl}_3$ ).  $\delta$  7.47 – 7.28 (m, 7H), 7.07 (d,  $J = 8.0$  Hz, 2H), 4.67 (dd,  $J = 7.8, 5.3$  Hz, 1H), 2.67 (ddd,  $J = 16.6, 9.4, 6.1$  Hz,

2H), 2.19 – 1.85 (m, 3H).  $^{13}\text{C}\{^1\text{H}\}$  NMR (125 MHz,  $\text{CDCl}_3$ ):  $\delta$  144.5, 140.9, 131.6, 128.7, 128.5, 127.9, 126.0, 119.7, 73.8, 40.4, 31.6.

### 3-(4-nitrophenyl)-1-phenylpropan-1-ol (35d):<sup>2</sup>

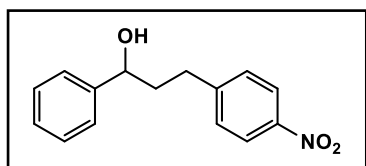

Purified by column chromatography using silica gel and ethyl acetate-hexane as eluent 78% (99 mg) isolated yield; colourless oil.  $^1\text{H}$  NMR (500 MHz,  $\text{CDCl}_3$ ).  $\delta$  8.15 (d,  $J$  = 8.5 Hz, 2H), 7.39 – 7.31 (m, 7H), 4.71 (dd,  $J$  = 8.1, 5.2 Hz, 1H), 2.88 (td,  $J$  = 9.9, 9.3, 4.8 Hz, 1H), 2.83 – 2.78 (m, 1H), 2.19 – 2.13 (m, 1H), 2.08 – 2.03 (m, 1H), 1.91 (s, 1H).  $^{13}\text{C}\{^1\text{H}\}$  NMR (125 MHz,  $\text{CDCl}_3$ ):  $\delta$  144.3, 129.4, 128.8, 128.1, 126.0, 123.8, 73.8, 40.0, 32.1.

### 3-(6-methoxynaphthalen-2-yl)-1-phenylpropan-1-ol (36d):<sup>24</sup>

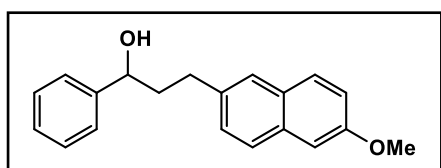

Purified by column chromatography using silica gel and ethyl acetate-hexane as eluent 75% (109.5 mg) isolated yield; colourless oil.  $^1\text{H}$  NMR (500 MHz,  $\text{CDCl}_3$ ).  $\delta$  7.67 (dd,  $J$  = 8.4, 2.3 Hz, 2H), 7.57 (s, 1H), 7.37 (d,  $J$  = 4.2 Hz, 4H), 7.31 (td,  $J$  = 7.4, 6.4, 3.0 Hz, 2H), 7.15–7.11 (m, 2H), 4.72 (t,  $J$  = 6.8 Hz, 1H), 3.92 (s, 3H), 2.92–2.80 (m, 2H), 2.25–2.19 (m, 1H), 2.11 (ddd,  $J$  = 20.3, 9.6, 6.0 Hz, 1H), 1.95 (d,  $J$  = 3.1 Hz, 1H).  $^{13}\text{C}\{^1\text{H}\}$  NMR (100 MHz,  $\text{CDCl}_3$ ):  $\delta$  157.3, 144.7, 137.0, 133.1, 129.2, 129.0, 128.7, 127.9, 127.8, 127.0, 126.5, 126.1, 118.8, 105.8, 74.0, 55.4, 40.6, 32.1.

### 1-cyclopropyl-3-phenylpropan-1-ol (37d):<sup>21</sup>

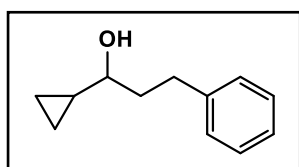

Purified by column chromatography using silica gel and ethyl acetate-hexane as eluent 81% (71.3 mg) isolated yield; colourless oil.  $^1\text{H}$  NMR (400 MHz,  $\text{CDCl}_3$ ).  $\delta$  7.36 – 7.13 (m, 5H), 2.99 – 2.63 (m, 3H), 1.92 (q,  $J$  = 7.3 Hz, 2H), 1.63 (s, 2H), 0.93 (dq,  $J$  = 8.1, 4.3, 3.5 Hz, 1H), 0.51 (qt,  $J$  = 11.8, 5.9 Hz, 2H), 0.22 (ddq,  $J$  = 22.3, 8.2, 4.1 Hz, 2H).  $^{13}\text{C}\{^1\text{H}\}$  NMR (125 MHz,  $\text{CDCl}_3$ ):  $\delta$  142.4, 128.5, 128.5, 125.9, 76.3, 38.8, 32.2, 18.2, 2.9, 2.7.

### cyclohexanol (38d):<sup>21</sup>

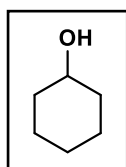

Purified by column chromatography using silica gel and ethyl acetate-hexane as eluent 78% (38.5 mg) isolated yield; colourless oil.  $^1\text{H}$  NMR (400 MHz,  $\text{CDCl}_3$ ).  $\delta$  3.57 (hept,  $J$  = 4.1 Hz, 1H), 1.87 (td,  $J$  = 11.4, 10.9, 6.2 Hz, 3H), 1.70 (dd,  $J$  = 8.9, 4.5 Hz, 2H), 1.56 – 1.45 (m, 1H), 1.32–1.11 (m, 5H).  $^{13}\text{C}\{^1\text{H}\}$  NMR (100 MHz,  $\text{CDCl}_3$ ):  $\delta$  70.4, 35.6, 25.5, 24.2.

### 1-phenylpentan-1-ol (39d):<sup>2</sup>

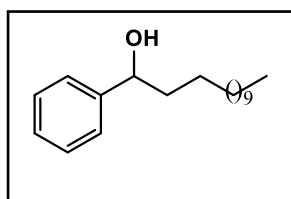

Purified by column chromatography using silica gel and ethyl acetate-hexane as eluent 73% (59.9 mg) isolated yield; colourless oil.  $^1\text{H}$  NMR (500 MHz,  $\text{CDCl}_3$ ).  $\delta$  7.36 (d,  $J$  = 4.6 Hz, 4H), 7.31 – 7.27 (m, 1H), 4.70 – 4.65 (m, 1H), 1.77 (ddd,  $J$  = 37.6, 9.2, 4.4 Hz, 2H), 1.43 (dd,  $J$  = 13.0, 6.8 Hz, 1H), 1.27 (s,



20H), 0.90 (t,  $J = 6.8$  Hz, 3H).  $^{13}\text{C}\{^1\text{H}\}$  NMR (125 MHz,  $\text{CDCl}_3$ ):  $\delta$  145.1, 128.6, 127.6, 126.0, 74.9, 39.3, 32.1, 29.8, 29.7, 29.5, 26.0, 22.8, 14.3.

#### pentan-2-ol (40d)<sup>25</sup>

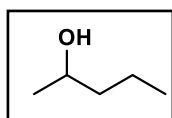

Purified by column chromatography using silica gel and ethyl acetate-hexane as eluent 78% NMR yield; colourless liquid.  $^1\text{H}$  NMR (400 MHz,  $\text{CDCl}_3$ ).  $\delta$  3.81 (td,  $J = 6.4, 4.3$  Hz, 1H), 1.42 (tdd,  $J = 14.0, 6.7, 4.0$  Hz, 4H), 1.19 (d,  $J = 6.1$  Hz, 3H), 0.97 – 0.89 (m, 3H).  $^{13}\text{C}\{^1\text{H}\}$  NMR (100 MHz,  $\text{CDCl}_3$ ):  $\delta$  68.1, 41.7, 23.6, 19.1, 14.2.

#### butan-2-ol (41d)<sup>25</sup>

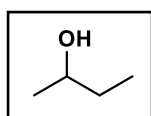

Purified by column chromatography using silica gel and ethyl acetate-hexane as eluent 71% NMR yield; colourless liquid.  $^1\text{H}$  NMR (400 MHz,  $\text{CDCl}_3$ ).  $\delta$  3.72 (h,  $J = 6.1$  Hz, 1H), 1.53 – 1.40 (m, 2H), 1.18 (d,  $J = 5.9$  Hz, 3H), 0.92 (t,  $J = 7.5$  Hz, 3H).  $^{13}\text{C}\{^1\text{H}\}$  NMR (100 MHz,  $\text{CDCl}_3$ ): 69.6, 32.1, 23.0, 10.1.

#### 3-(4-methoxyphenyl)-1-(p-tolyl)propan-1-ol (42d)<sup>2</sup>

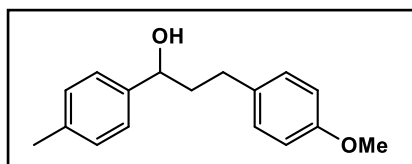

Purified by column chromatography using silica gel and ethyl acetate-hexane as eluent 76% (97.4 mg) isolated yield; colourless oil.  $^1\text{H}$  NMR (500 MHz,  $\text{CDCl}_3$ ).  $\delta$  7.26 (d,  $J = 7.7$  Hz, 2H), 7.19 (d,  $J = 7.8$  Hz, 2H), 7.14 (d,  $J = 8.6$  Hz, 2H), 6.86 (d,  $J = 9.0$  Hz, 2H), 4.65 (dd,  $J = 7.7, 5.4$  Hz, 1H), 3.81 (s, 3H), 2.72 – 2.60 (m, 2H), 2.38 (s, 3H), 2.15 – 1.97 (m, 3H).  $^{13}\text{C}\{^1\text{H}\}$  NMR (125 MHz,  $\text{CDCl}_3$ ):  $\delta$  157.8, 137.3, 134.0, 129.4, 129.2, 126.0, 113.9, 73.7, 31.2, 21.2.

#### 3,3'-(1,3-phenylene)bis(1-(4-(trifluoromethyl)phenyl)propan-1-ol) (43d)<sup>2</sup>

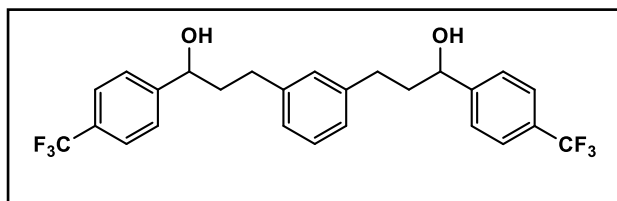

Purified by column chromatography using silica gel and ethyl acetate-hexane as eluent 80% (192 mg) isolated yield; colourless oil.  $^1\text{H}$  NMR (500 MHz,  $\text{CDCl}_3$ ).  $\delta$  7.55 (s, 2H), 7.40 – 7.37 (m, 2H), 7.37 (d,  $J = 1.6$  Hz, 4H), 7.31 (d,  $J = 7.8$  Hz, 4H), 4.69 (dd,  $J = 7.7, 5.3$  Hz, 2H), 2.83 (ddd,  $J = 15.1, 9.8, 5.6$  Hz, 2H), 2.78 – 2.70 (m, 2H), 2.19 – 2.11 (m, 2H), 2.05 (ddd,  $J = 14.2, 10.1, 5.0$  Hz, 2H), 2.00 (d,  $J = 9.9$  Hz, 2H).  $^{13}\text{C}\{^1\text{H}\}$  NMR (125 MHz,  $\text{CDCl}_3$ ):  $\delta$  146.1, 144.4, 128.8 (q,  $J_{\text{C,F}} = 32.2$  Hz), 128.0, 126.0, 125.4 (q,  $J_{\text{C,F}} = 5$  Hz), 124.5 (q,  $J_{\text{C,F}} = 271.9$  Hz), 73.8, 40.2, 32.0.  $^{19}\text{F}\{^1\text{H}\}$  NMR (470 MHz,  $\text{CDCl}_3$ ):  $\delta$  –62.3.

## 12. Copies of $^1\text{H}$ and $^{13}\text{C}$ NMR Spectra of Products

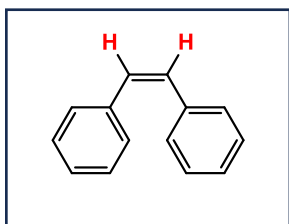

$^1\text{H}$  NMR ( $\text{CDCl}_3$ , 400 MHz), **1b**

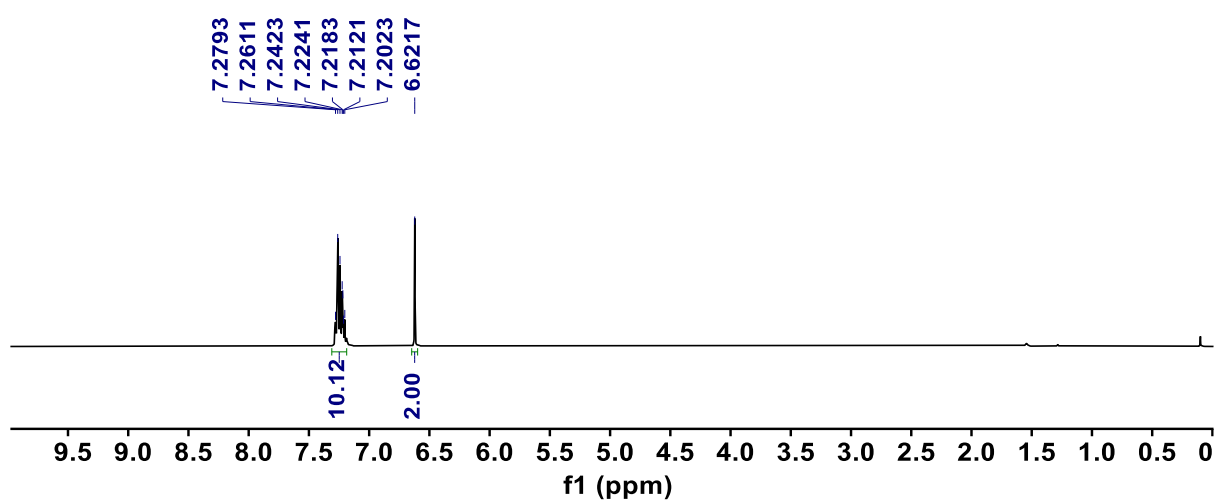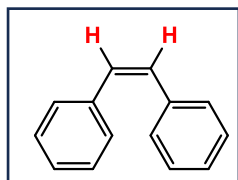

$^{13}\text{C}\{^1\text{H}\}$  NMR (125 MHz,  $\text{CDCl}_3$ ), **1b**

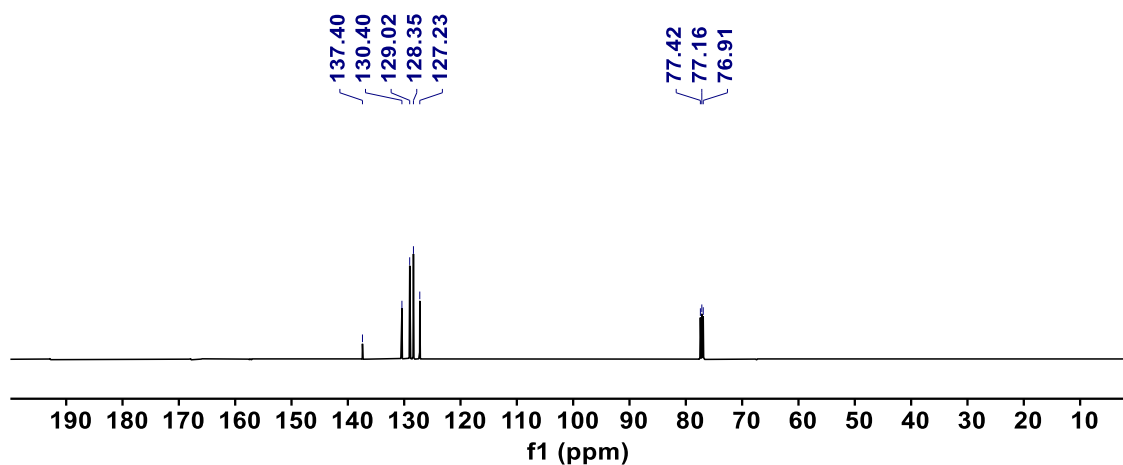

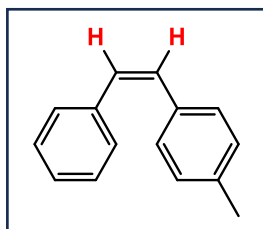

$^1\text{H}$  NMR ( $\text{CDCl}_3$ , 400 MHz), **2b**

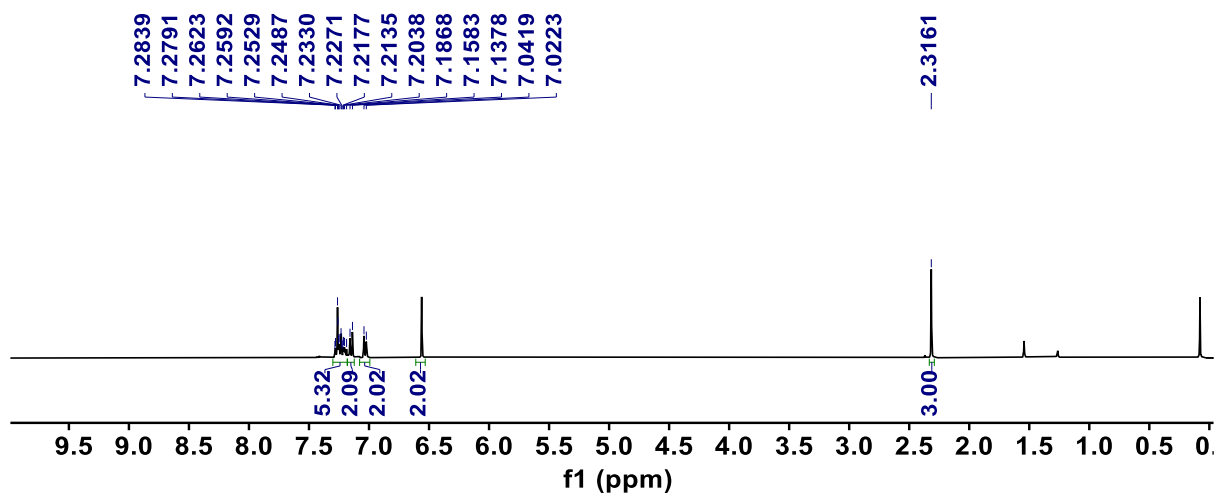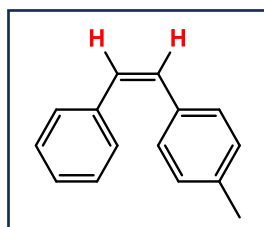

$^{13}\text{C}\{^1\text{H}\}$  NMR (125 MHz,  $\text{CDCl}_3$ ), **2b**

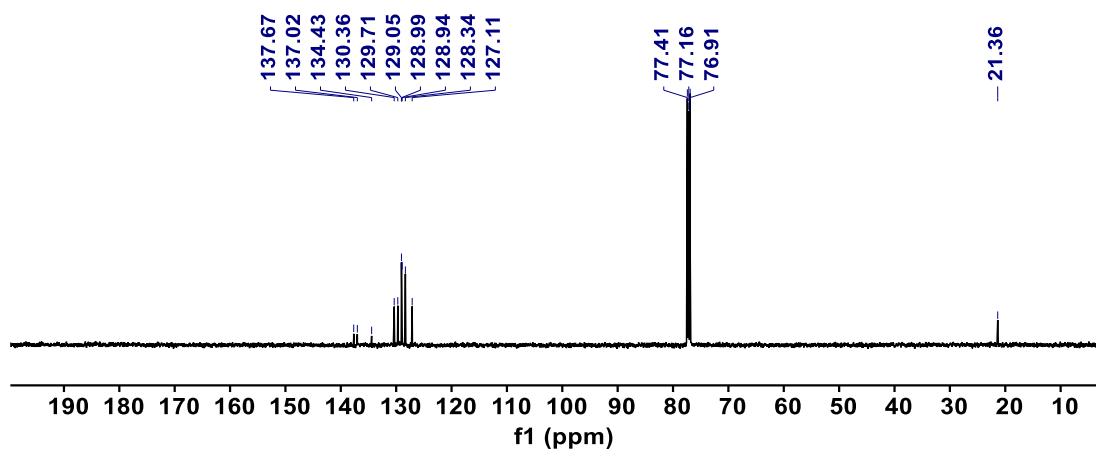

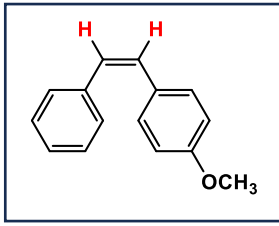

$^1\text{H}$  NMR ( $\text{CDCl}_3$ , 500 MHz), **3b**

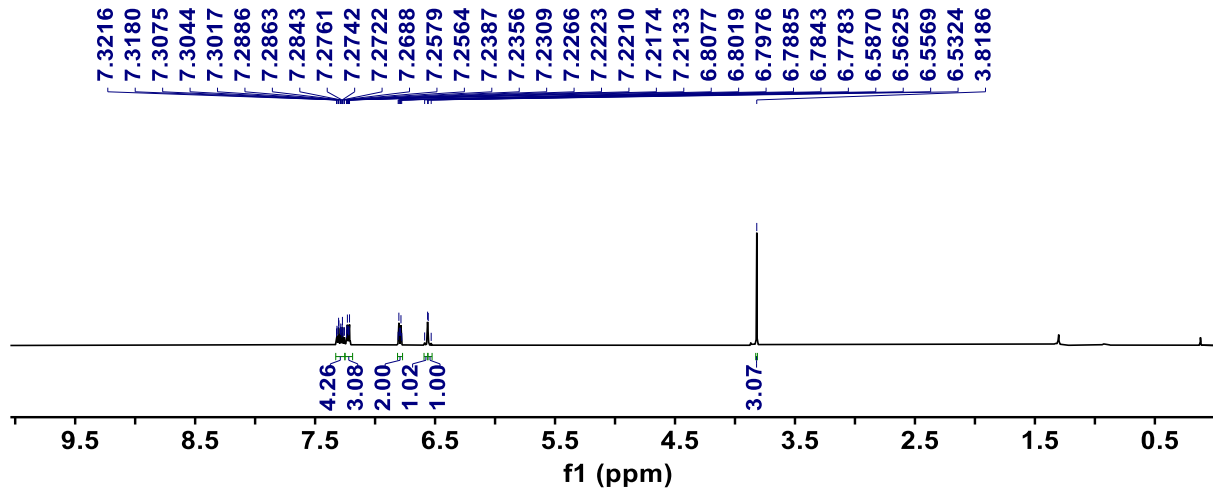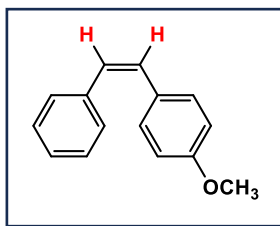

$^{13}\text{C}\{^1\text{H}\}$  NMR (125 MHz,  $\text{CDCl}_3$ ), **3b**

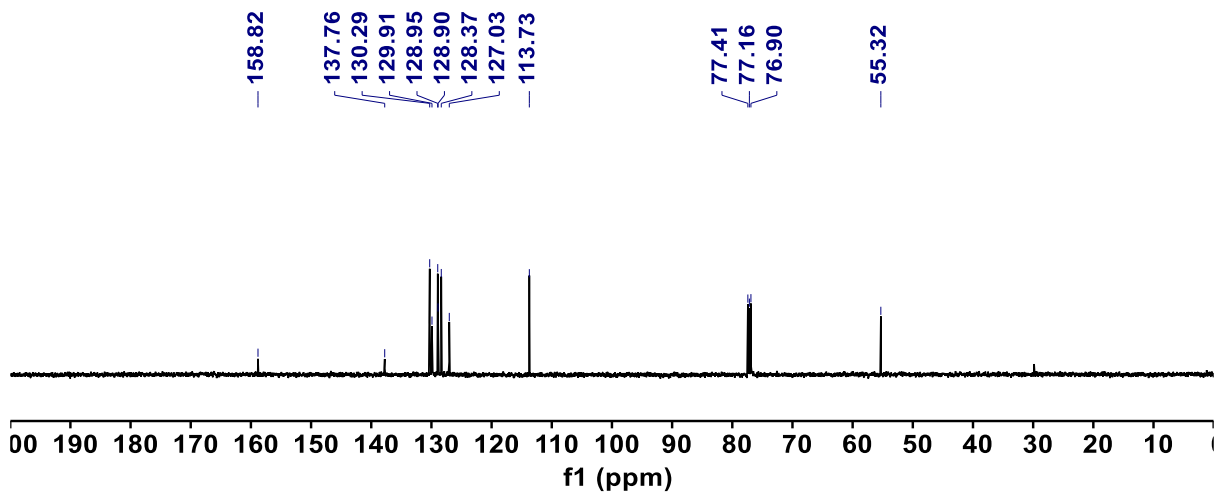

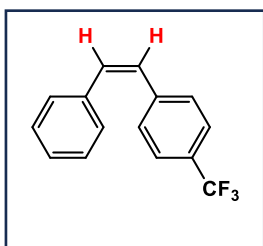

$^1\text{H}$  NMR ( $\text{CDCl}_3$ , 400 MHz), **4b**

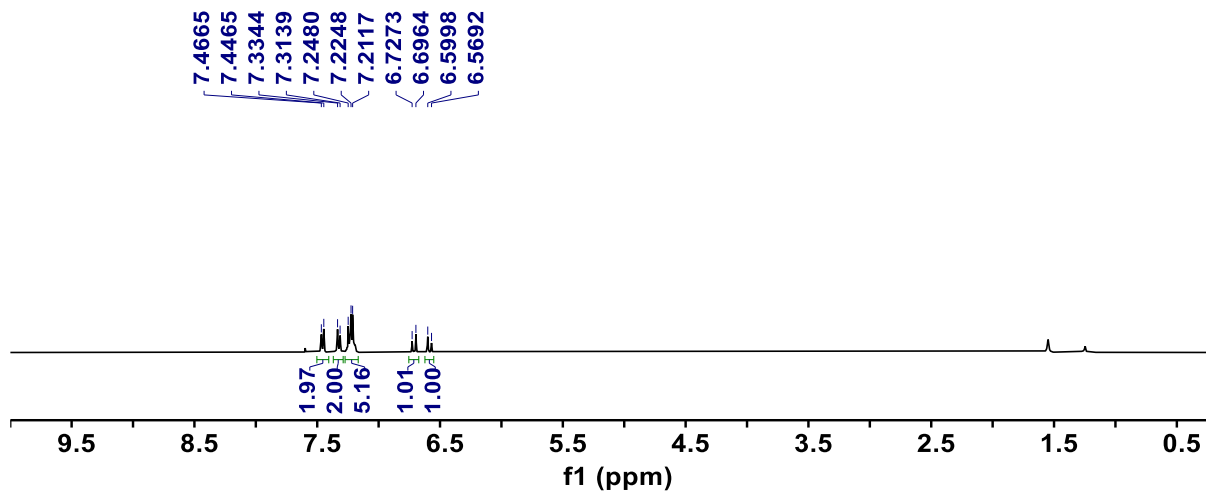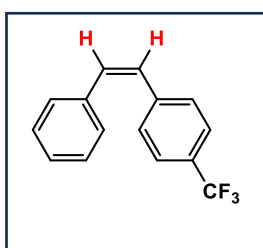

$^{13}\text{C}\{^1\text{H}\}$  NMR (100 MHz,  $\text{CDCl}_3$ ), **4b**

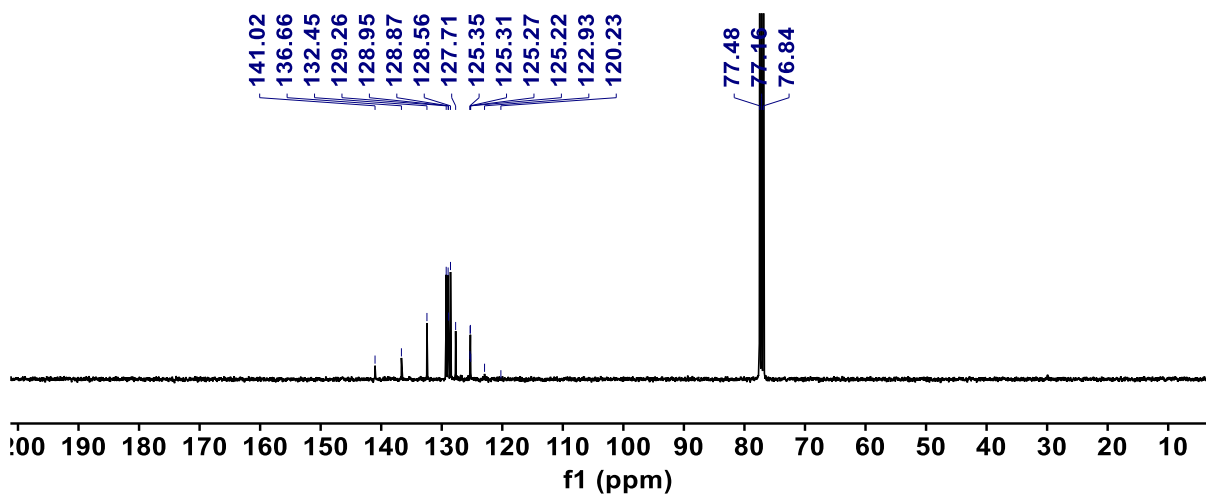

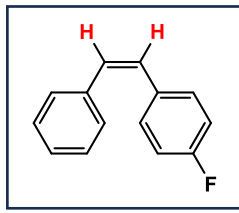

$^1\text{H}$  NMR ( $\text{CDCl}_3$ , 500 MHz), **5b**

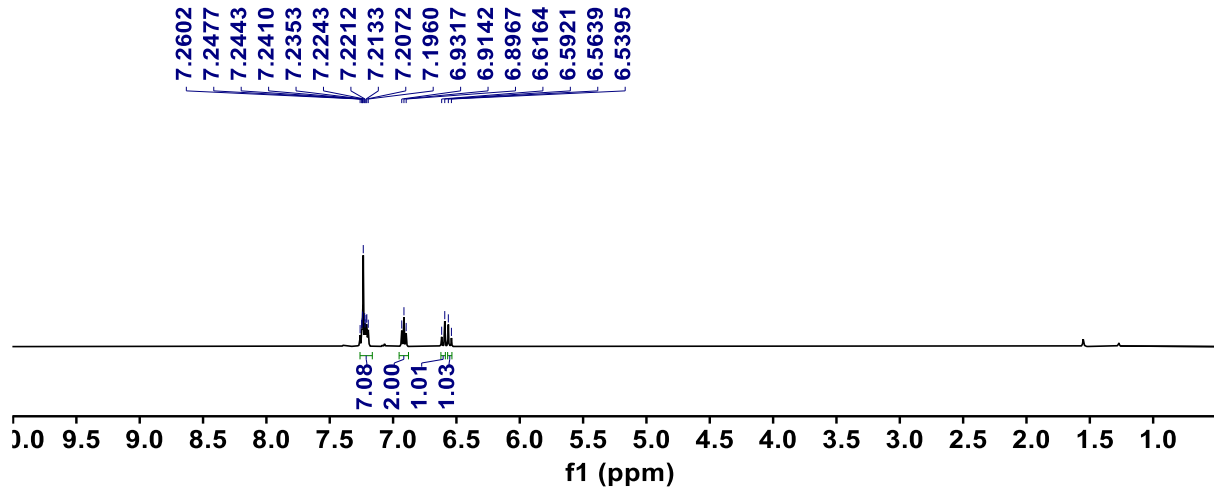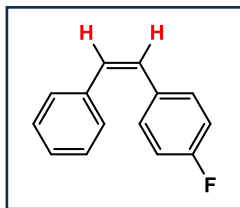

$^{13}\text{C}\{^1\text{H}\}$  NMR (125 MHz,  $\text{CDCl}_3$ ), **5b**

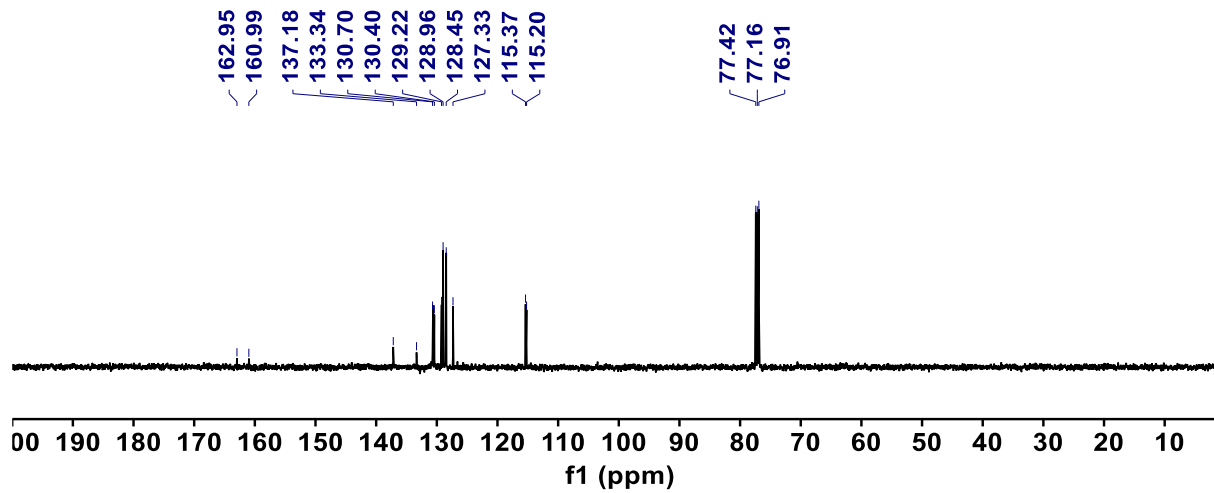

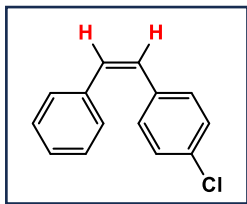

$^1\text{H}$  NMR ( $\text{CDCl}_3$ , 500 MHz), **6b**

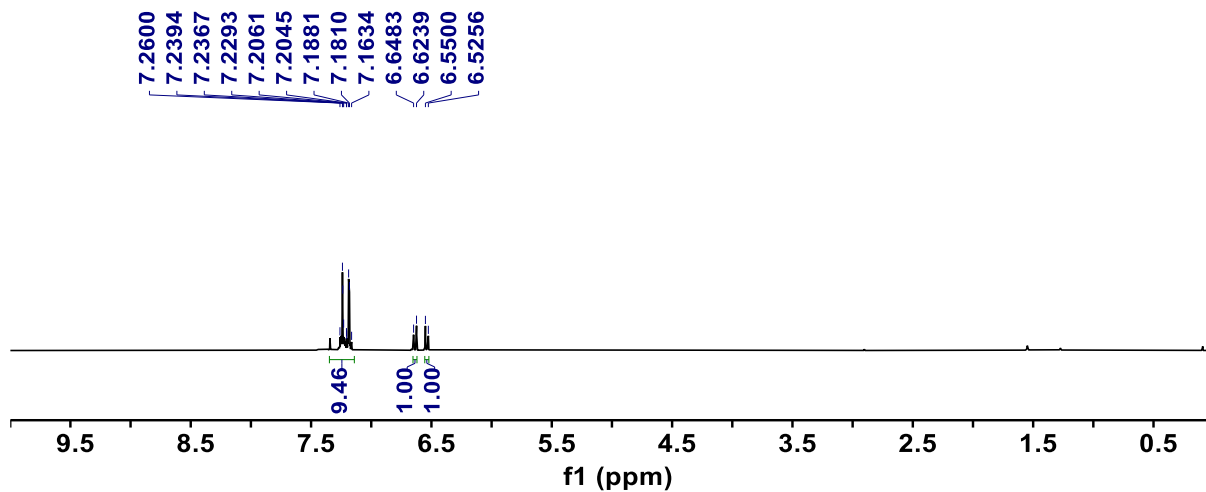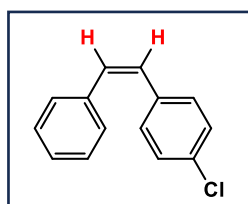

$^{13}\text{C}\{^1\text{H}\}$  NMR (125 MHz,  $\text{CDCl}_3$ ), **6b**

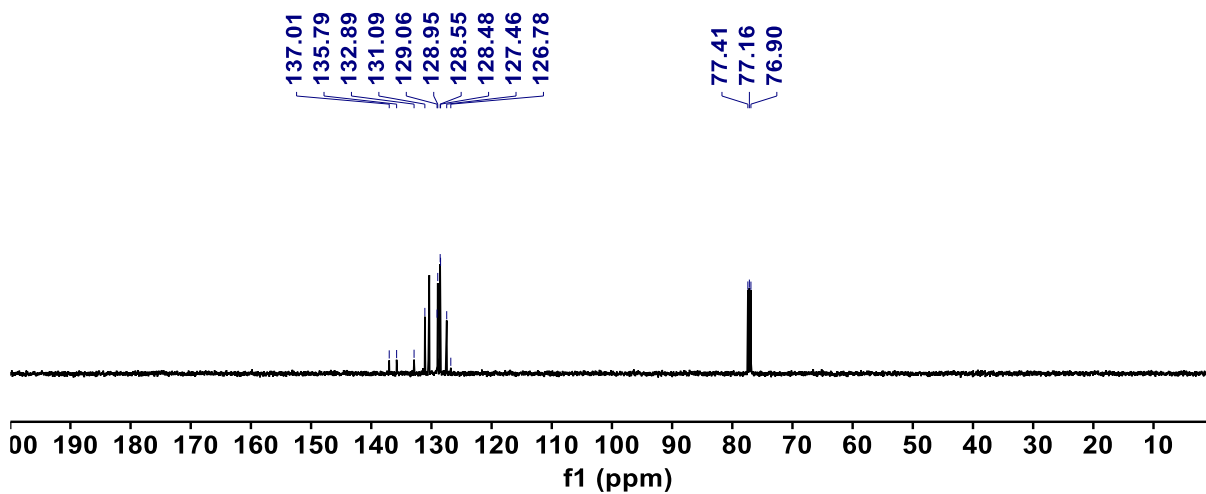

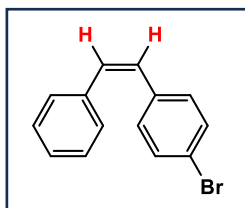

$^1\text{H NMR}$  ( $\text{CDCl}_3$ , 500 MHz), **7b**

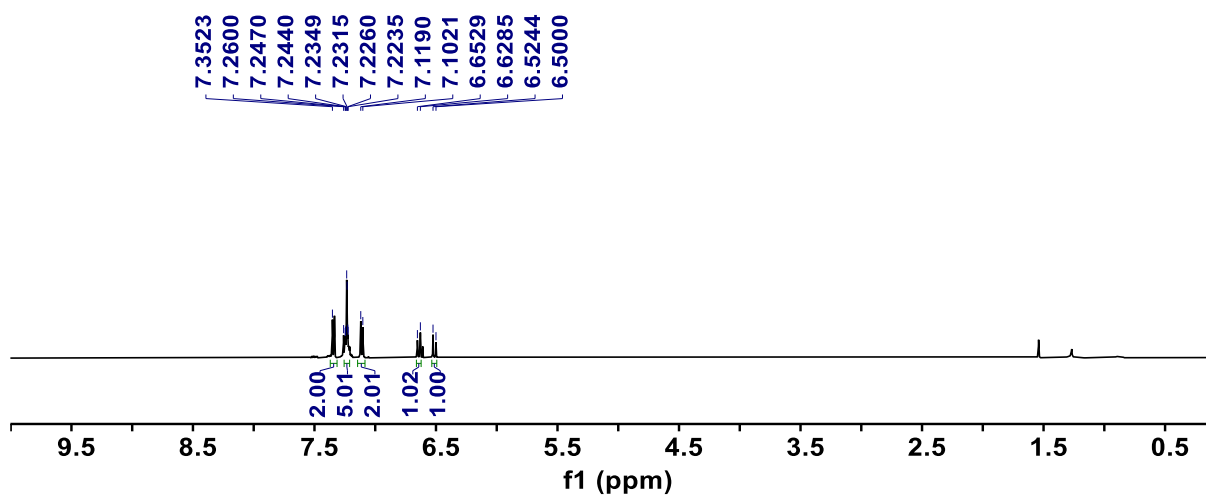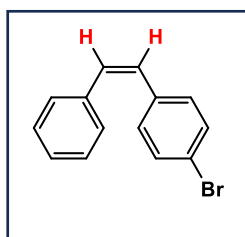

$^{13}\text{C}\{^1\text{H}\}$  NMR (125 MHz,  $\text{CDCl}_3$ ), **7b**

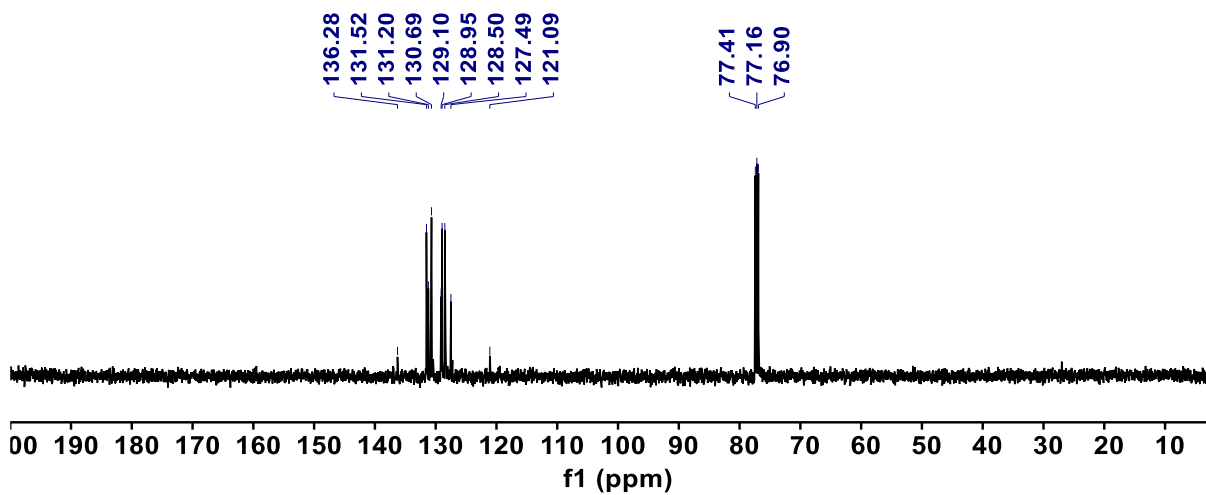



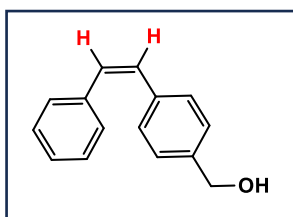

$^1\text{H}$  NMR ( $\text{CDCl}_3$ , 400 MHz), **8b**

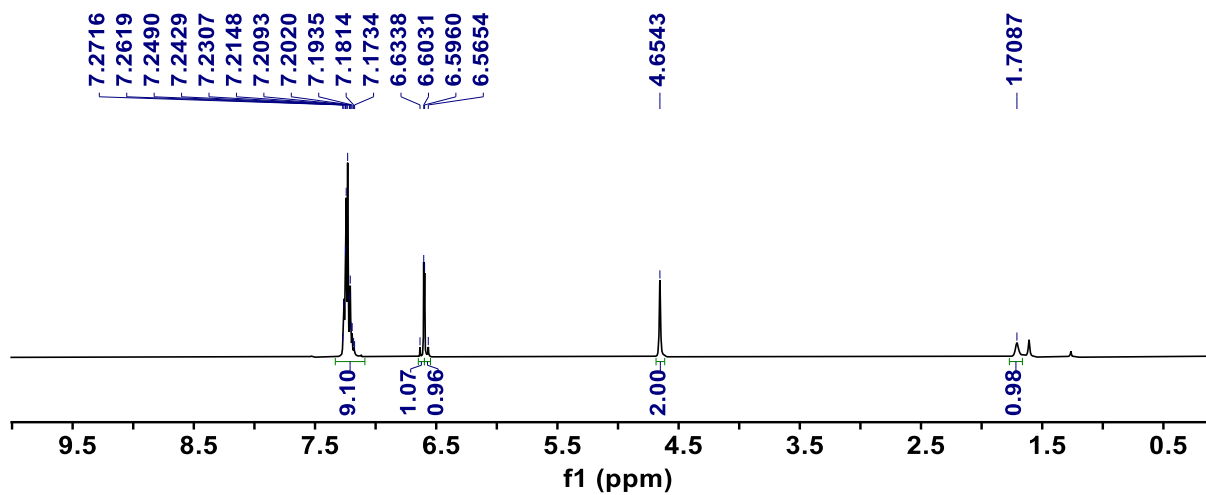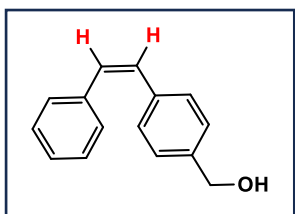

$^{13}\text{C}\{^1\text{H}\}$  NMR (100 MHz,  $\text{CDCl}_3$ ), **8b**

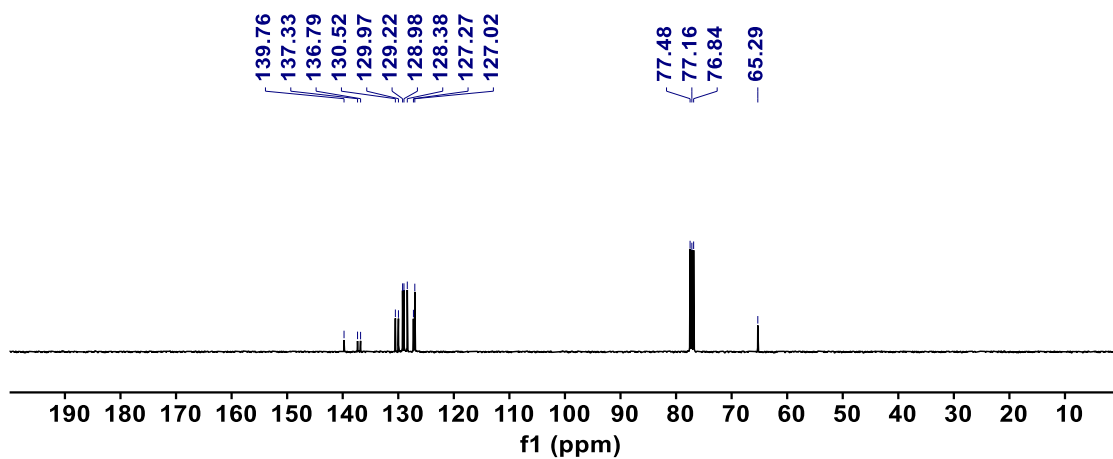

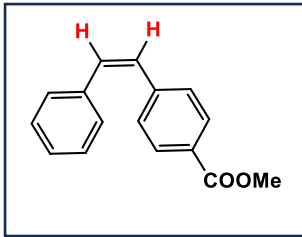

$^1\text{H}$  NMR ( $\text{CDCl}_3$ , 400 MHz), **9b**

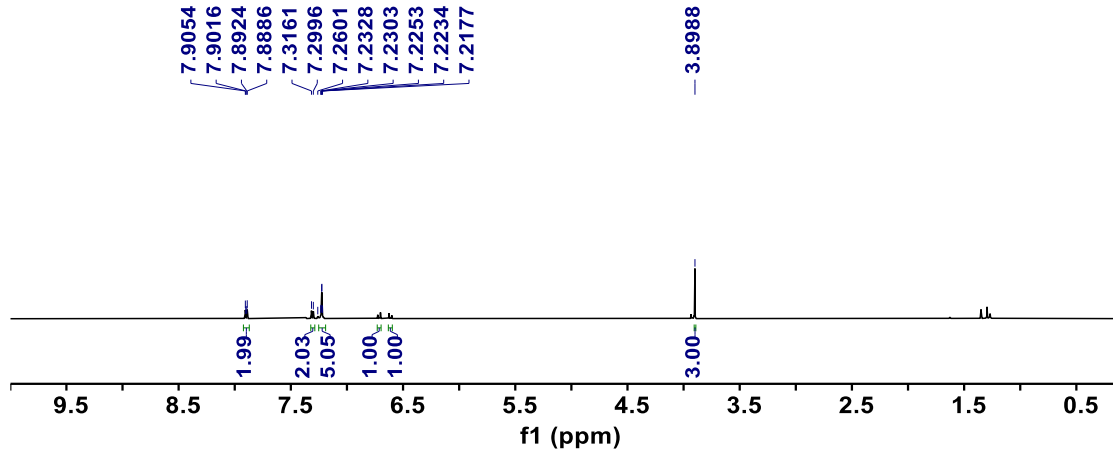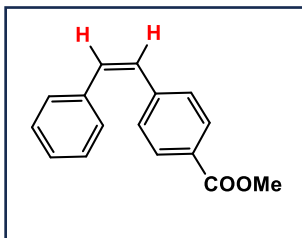

$^{13}\text{C}\{^1\text{H}\}$  NMR (125 MHz,  $\text{CDCl}_3$ ), **9b**

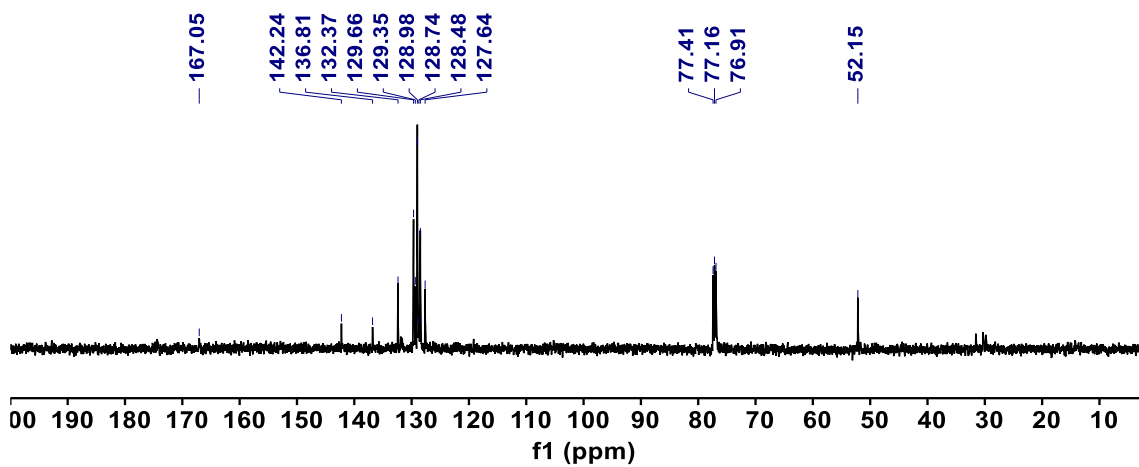

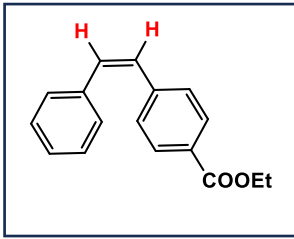

$^1\text{H}$  NMR ( $\text{CDCl}_3$ , 400 MHz), **10b**

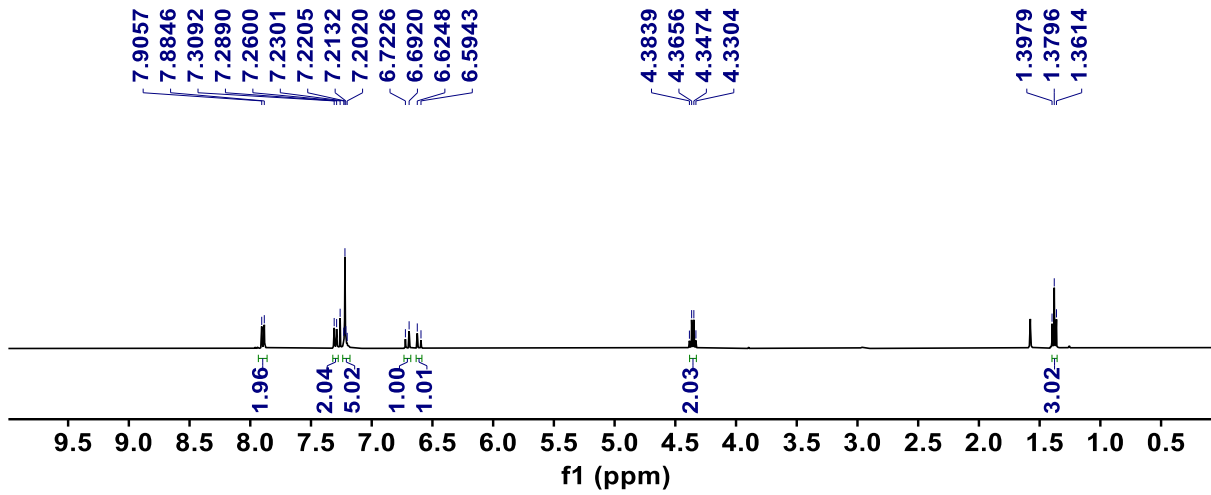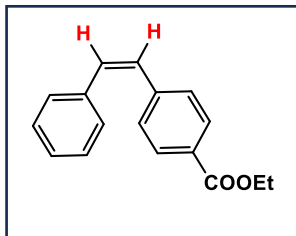

$^{13}\text{C}\{^1\text{H}\}$  NMR (100 MHz,  $\text{CDCl}_3$ ), **10b**

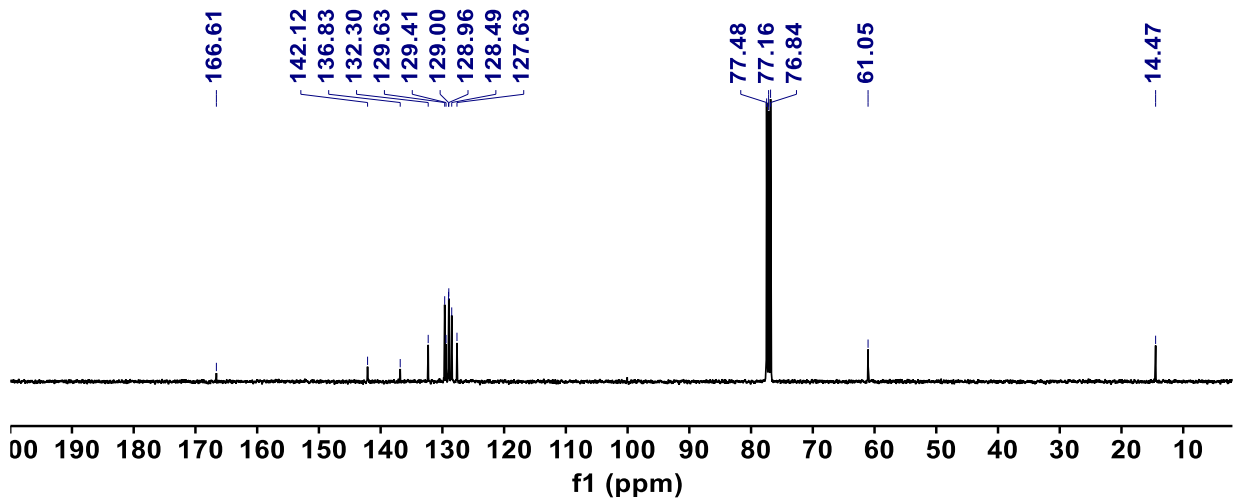

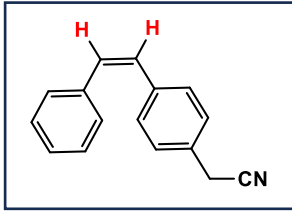

$^1\text{H NMR}$  ( $\text{CDCl}_3$ , 400 MHz), **11b**

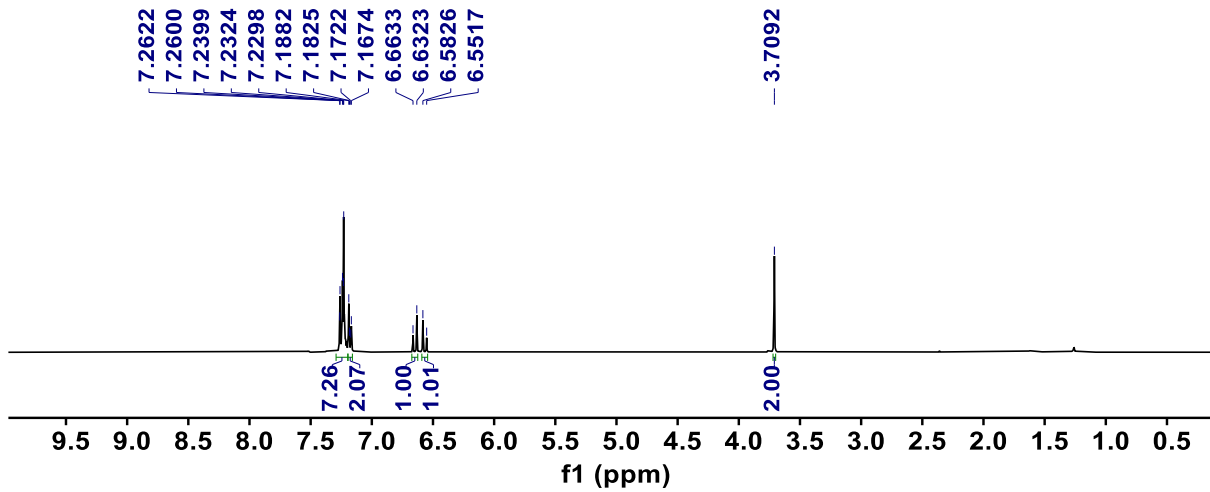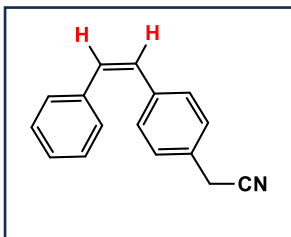

$^{13}\text{C}\{^1\text{H}\}$  NMR (125 MHz,  $\text{CDCl}_3$ ), **11b**

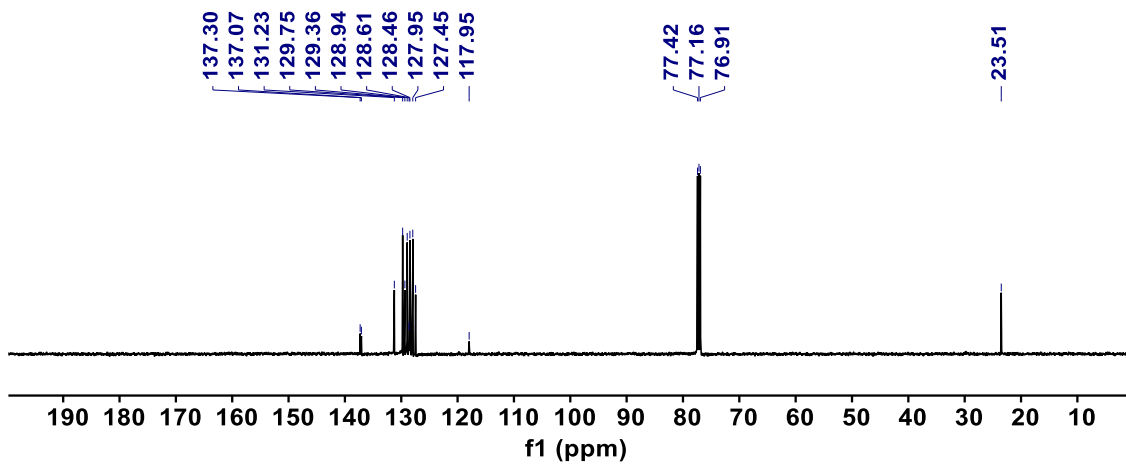

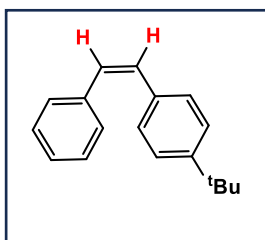

$^1\text{H NMR}$  ( $\text{CDCl}_3$ , 500 MHz), **12b**

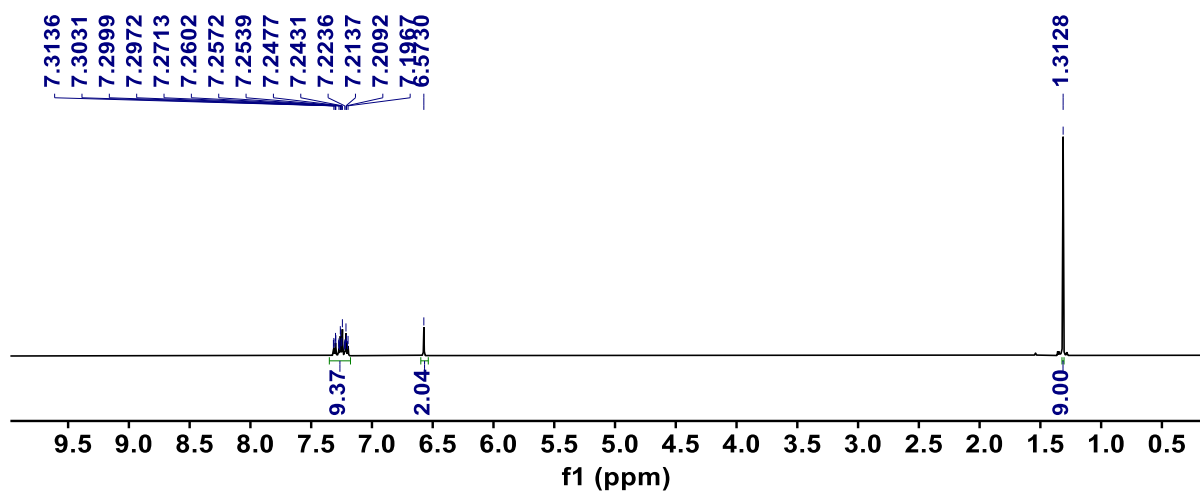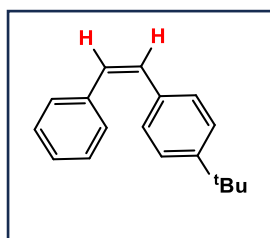

$^{13}\text{C}\{^1\text{H}\}$  NMR (125 MHz,  $\text{CDCl}_3$ ), **12b**

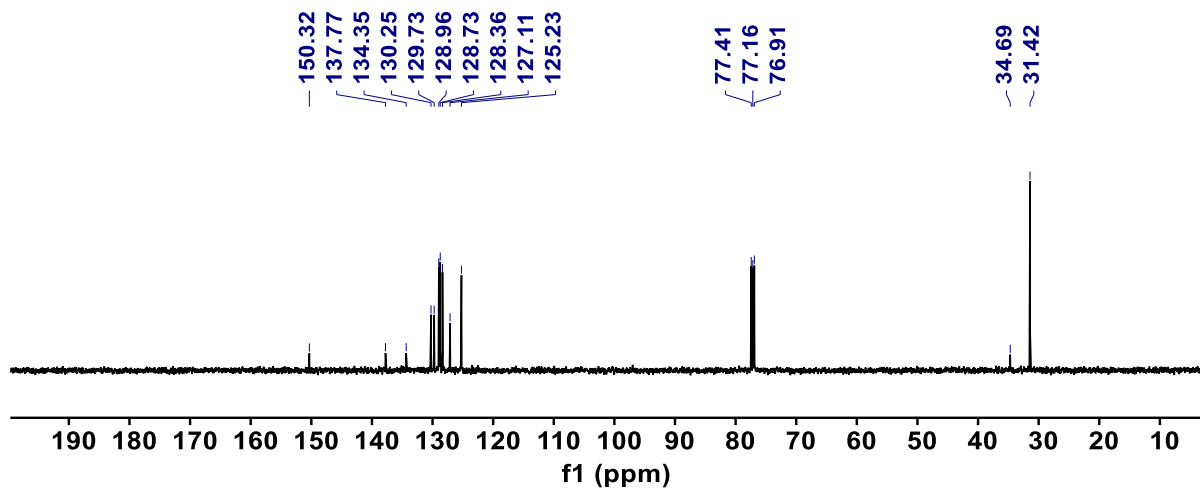

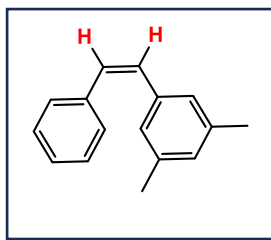

$^1\text{H}$  NMR ( $\text{CDCl}_3$ , 400 MHz), **13b**

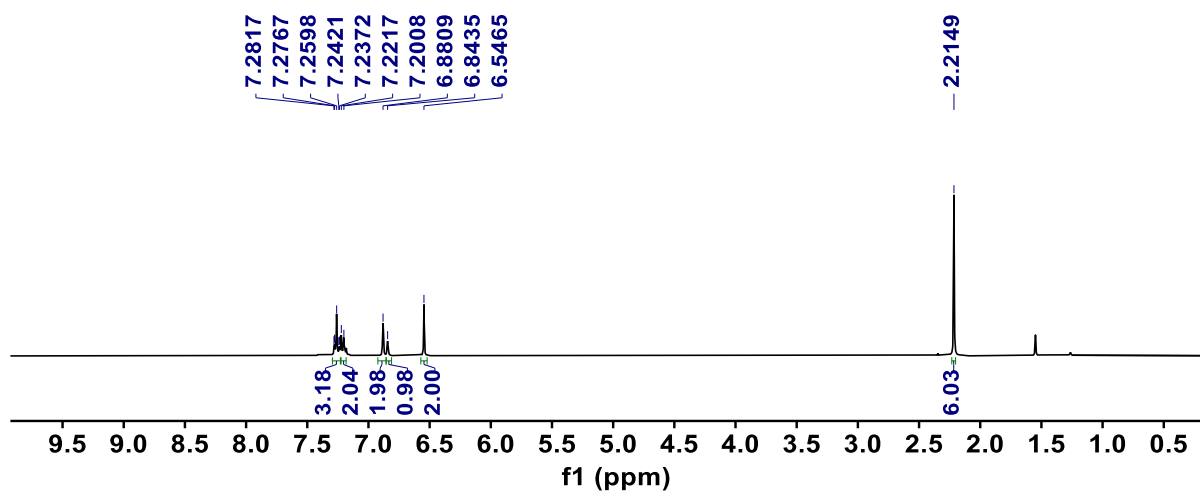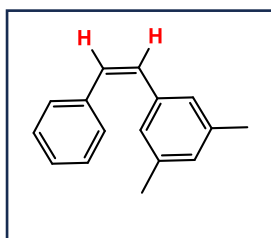

$^{13}\text{C}\{^1\text{H}\}$  NMR (125 MHz,  $\text{CDCl}_3$ ), **13b**

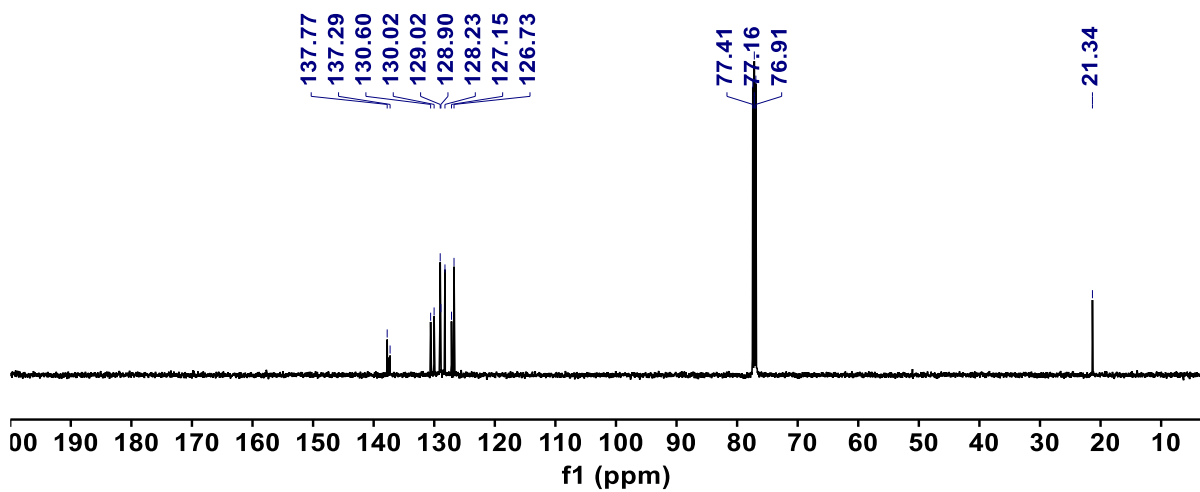

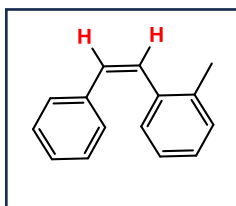

$^1\text{H}$  NMR ( $\text{CDCl}_3$ , 400 MHz), **14b**

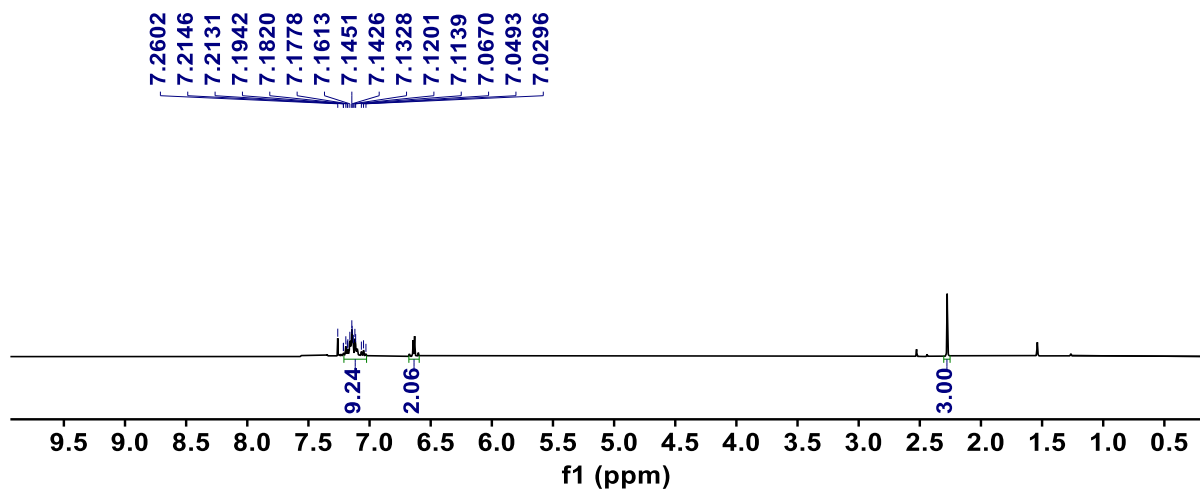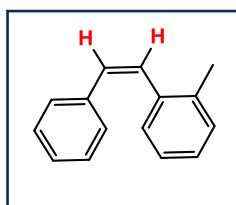

$^{13}\text{C}\{^1\text{H}\}$  NMR (100 MHz,  $\text{CDCl}_3$ ), **14b**

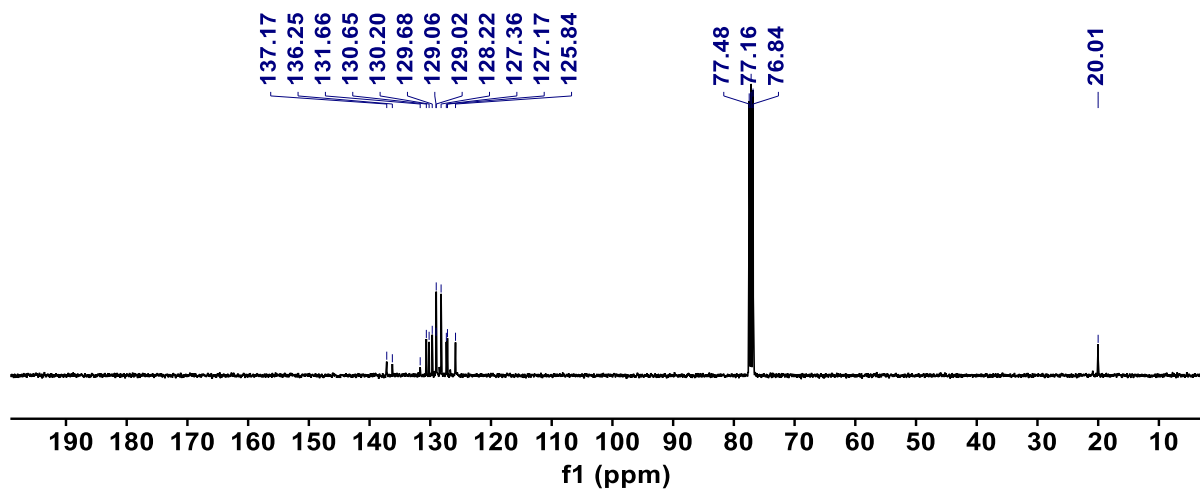

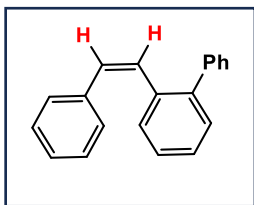

$^1\text{H}$  NMR ( $\text{CDCl}_3$ , 500 MHz), **15b**

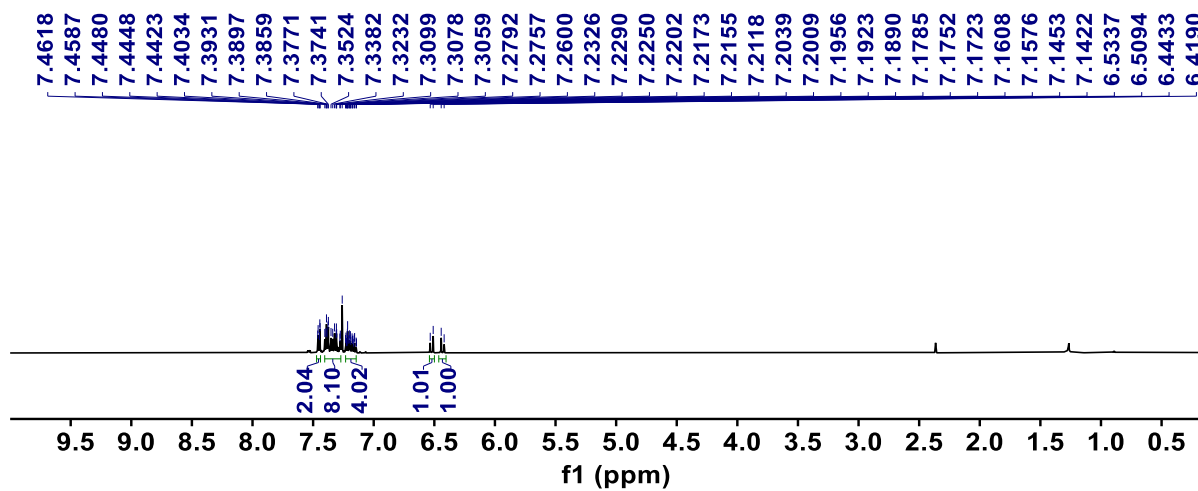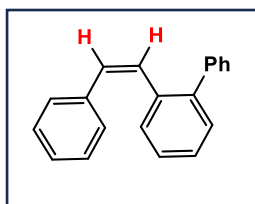

$^{13}\text{C}\{^1\text{H}\}$  NMR (125 MHz,  $\text{CDCl}_3$ ), **15b**

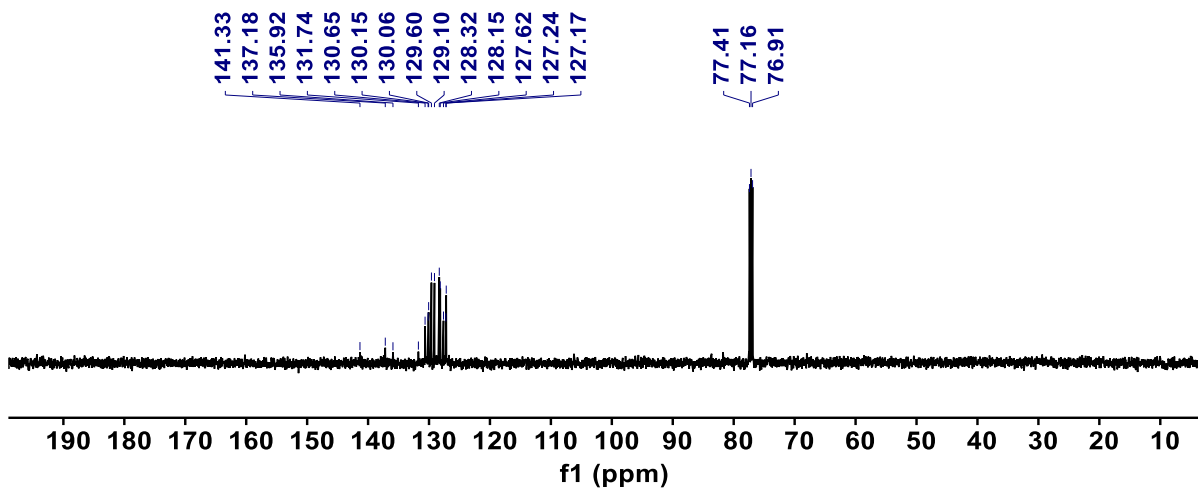



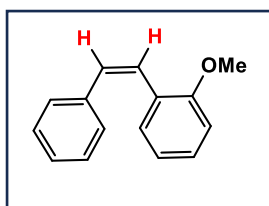

$^1\text{H}$  NMR ( $\text{CDCl}_3$ , 500 MHz), **16b**

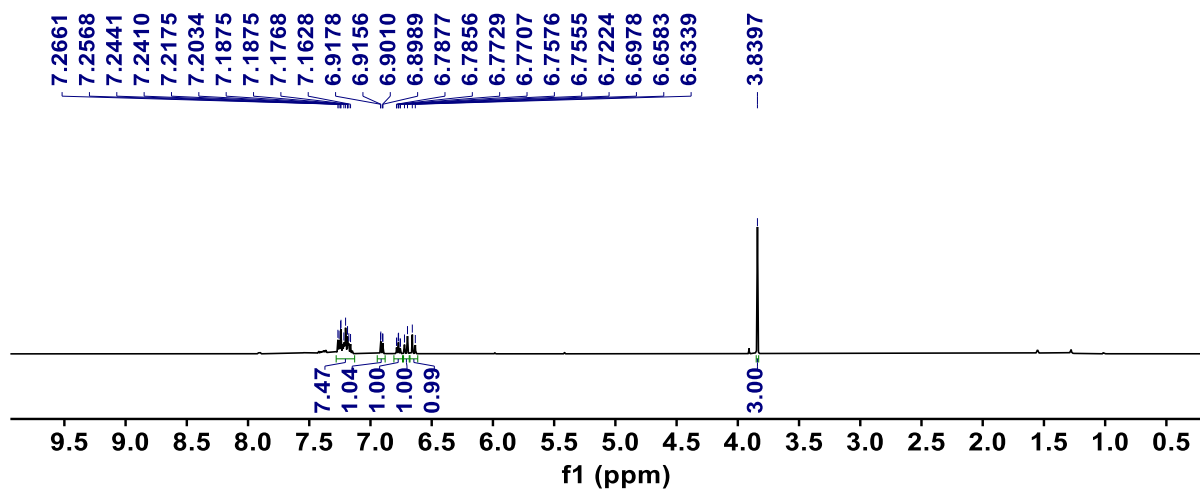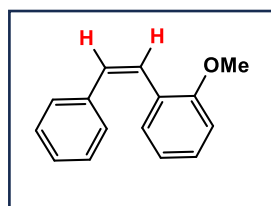

$^{13}\text{C}\{^1\text{H}\}$  NMR (125 MHz,  $\text{CDCl}_3$ ), **16b**

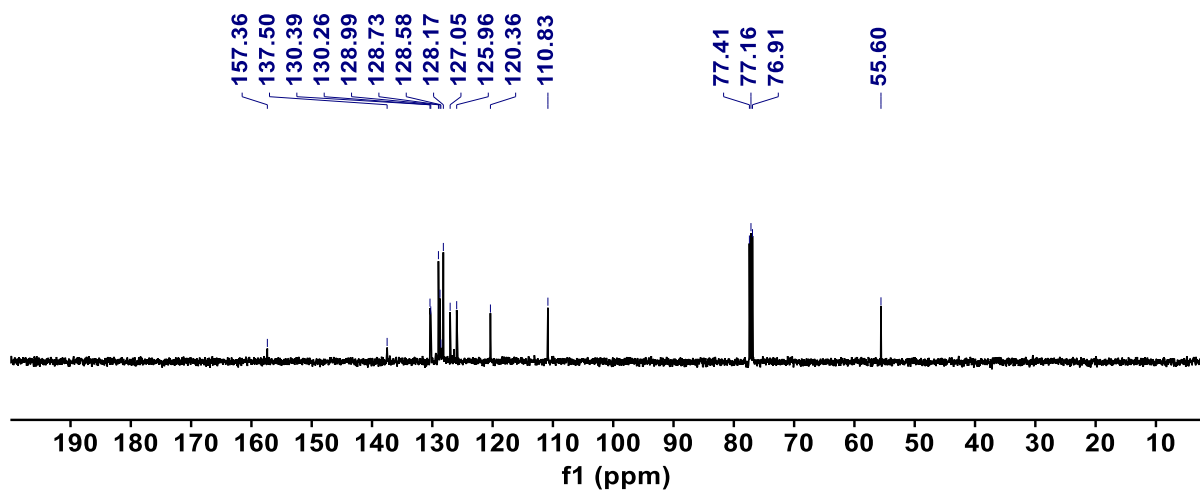

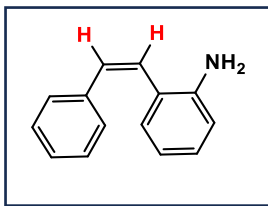

$^1\text{H}$  NMR ( $\text{CDCl}_3$ , 400 MHz), **17b**

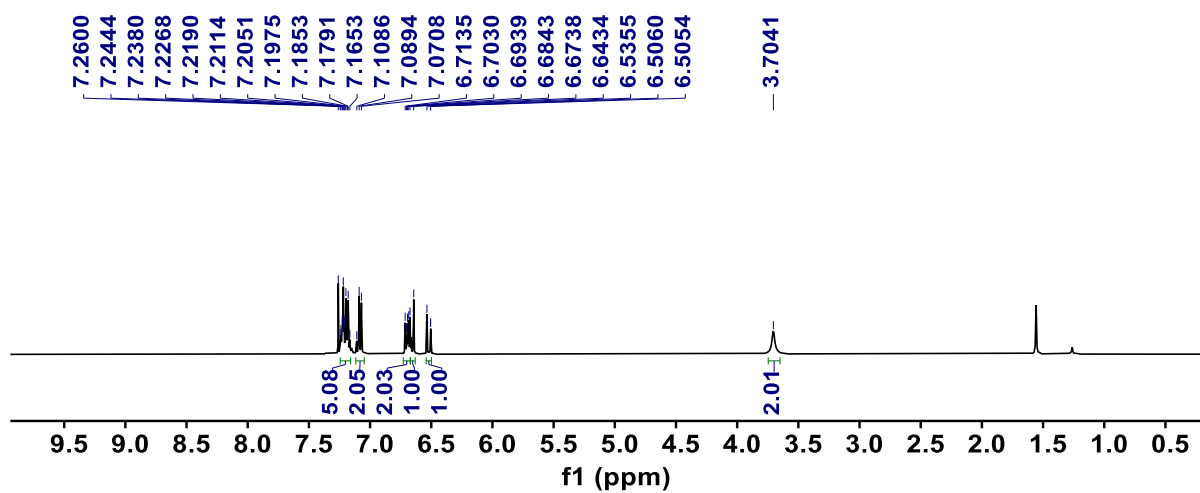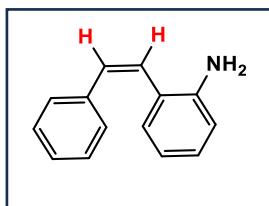

$^{13}\text{C}\{^1\text{H}\}$  NMR (100 MHz,  $\text{CDCl}_3$ ), **17b**

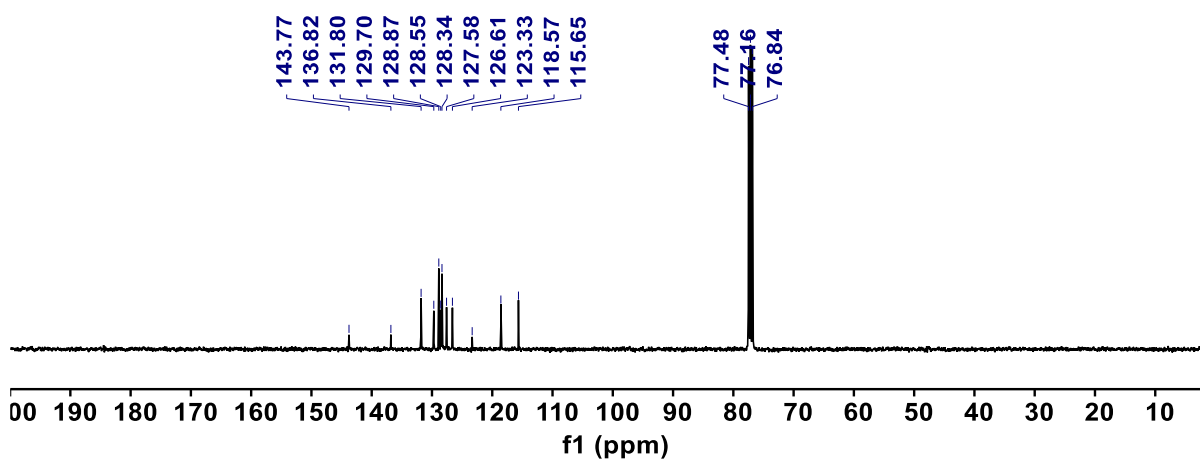

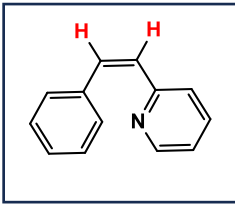

$^1\text{H}$  NMR ( $\text{CDCl}_3$ , 500 MHz), **18b**

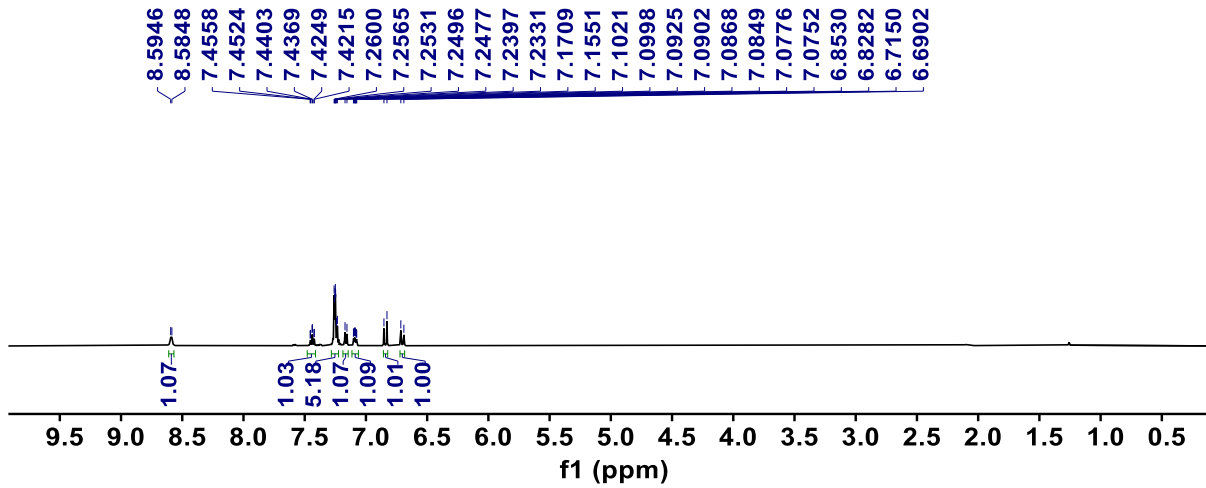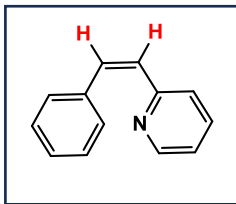

$^{13}\text{C}\{^1\text{H}\}$  NMR (125 MHz,  $\text{CDCl}_3$ ), **18b**

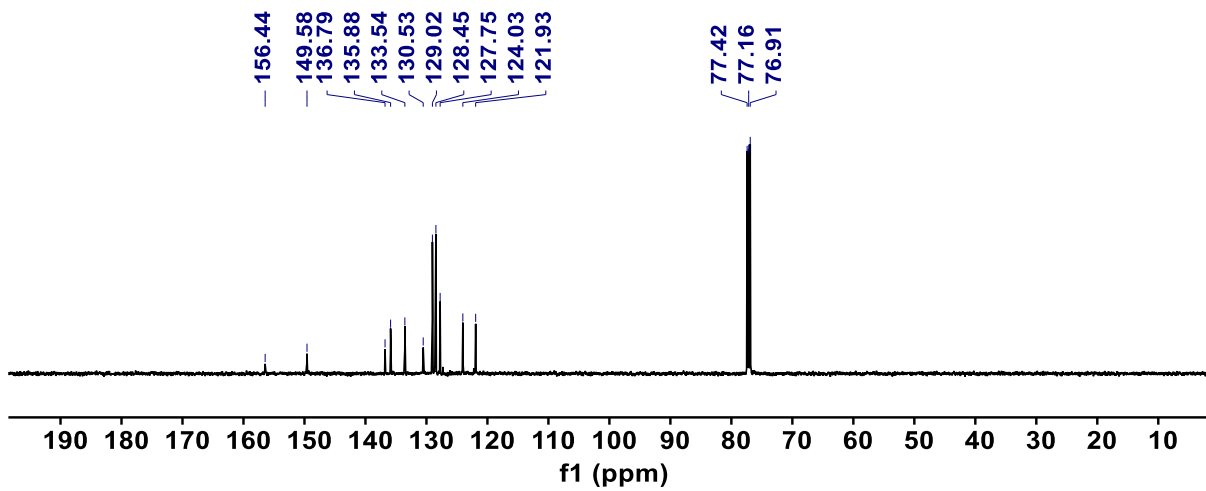

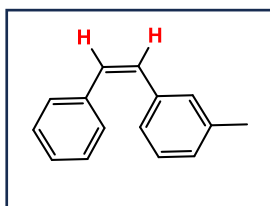

**$^1\text{H}$  NMR (CDCl<sub>3</sub>, 400 MHz), **19b****

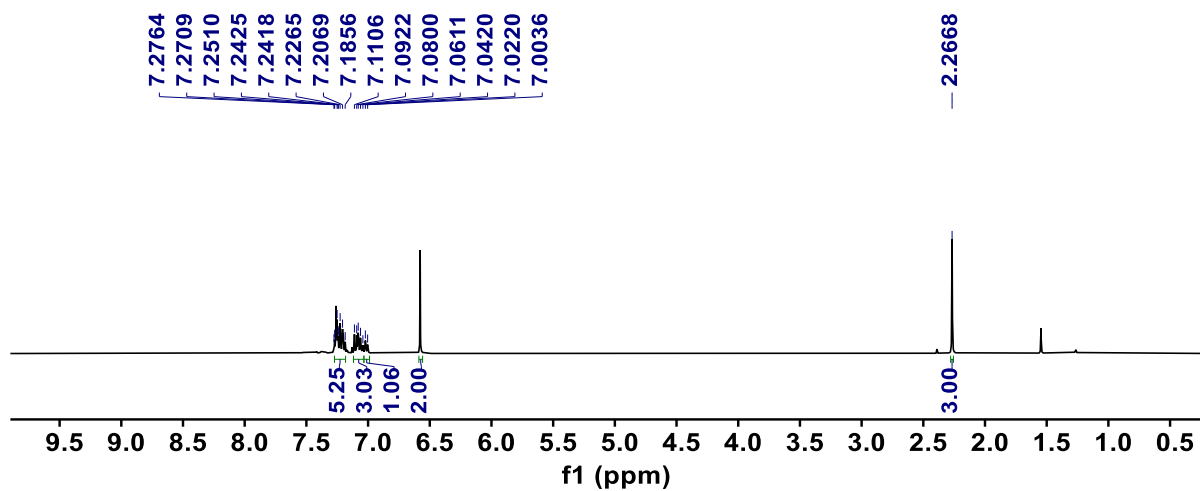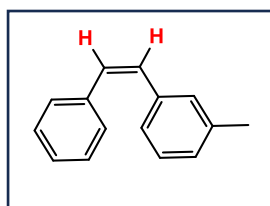

**$^{13}\text{C}\{^1\text{H}\}$  NMR (100 MHz, CDCl<sub>3</sub>), **19b****

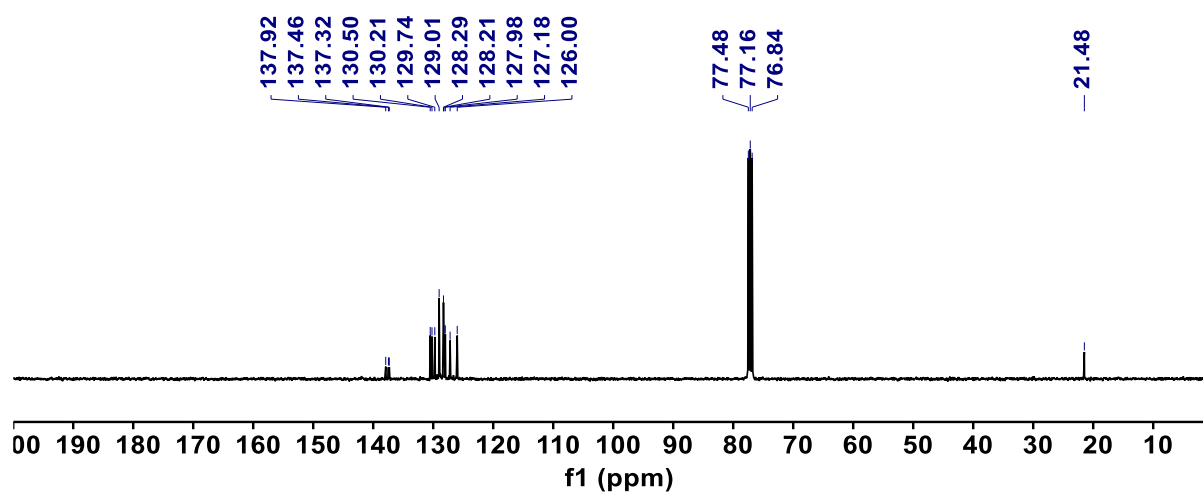

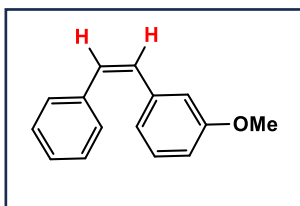

**$^1\text{H}$  NMR** ( $\text{CDCl}_3$ , 400 MHz), **20b**

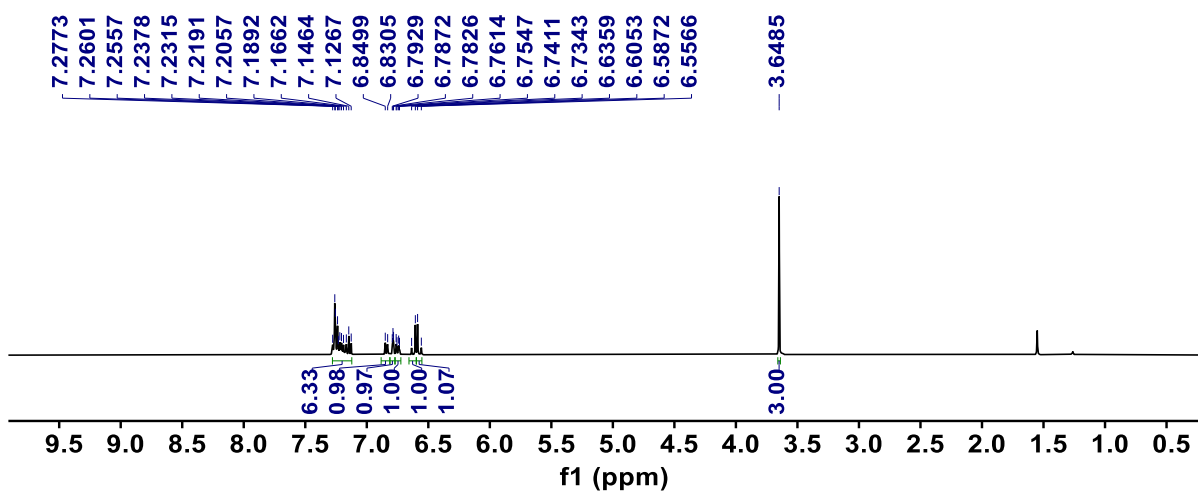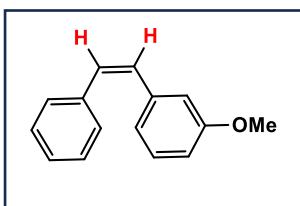

**$^{13}\text{C}\{^1\text{H}\}$  NMR** (125 MHz,  $\text{CDCl}_3$ ), **20b**

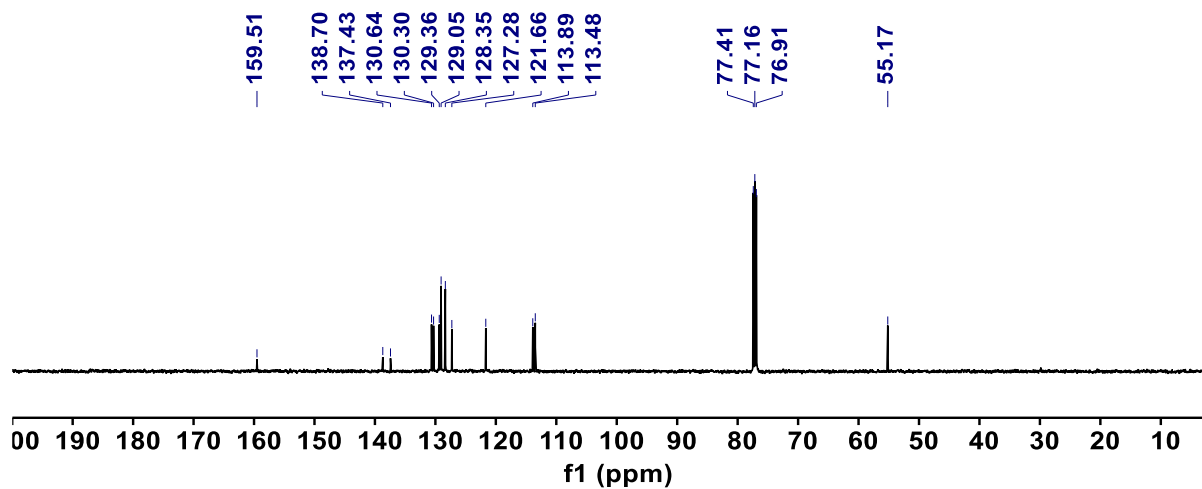

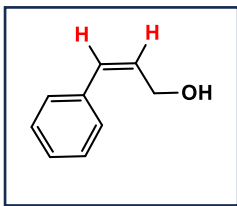

**$^1\text{H}$  NMR (CDCl<sub>3</sub>, 500 MHz), 21b**

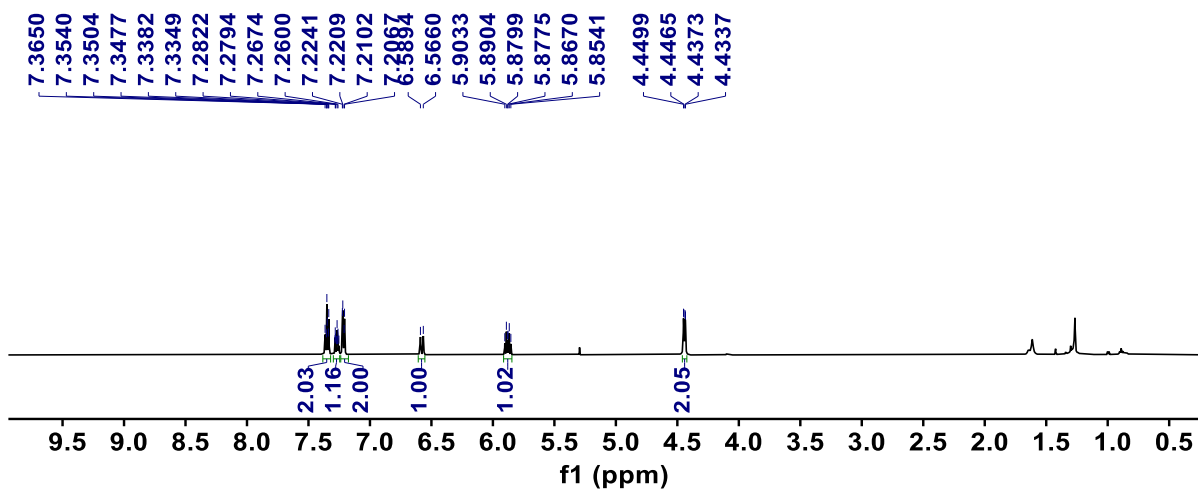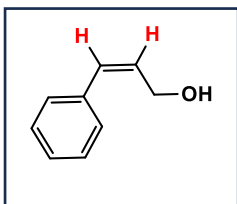

**$^{13}\text{C}\{^1\text{H}\}$  NMR (125 MHz, CDCl<sub>3</sub>), 21b**

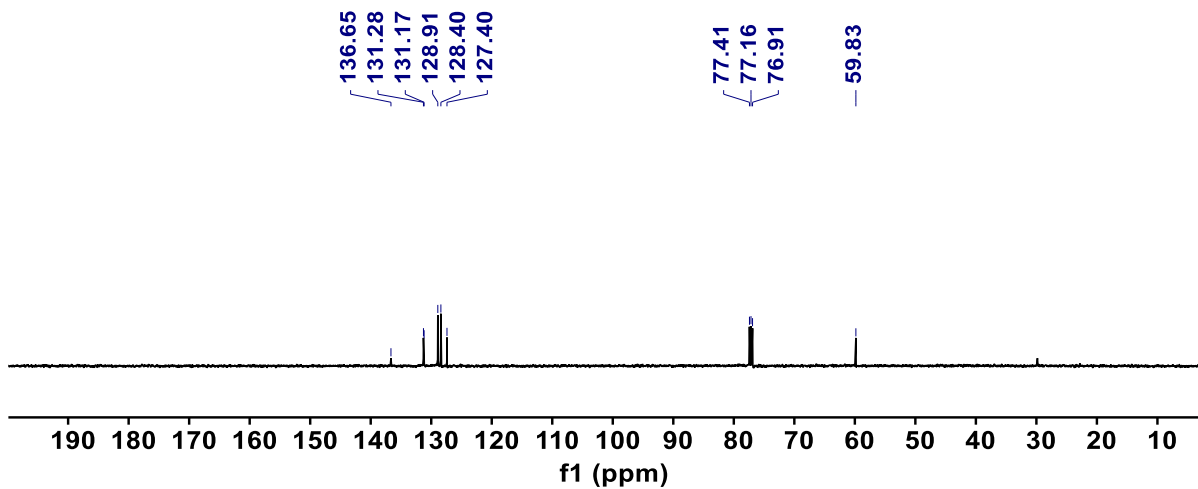

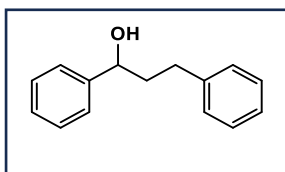

$^1\text{H}$  NMR (400 MHz,  $\text{CDCl}_3$ ), **22d**

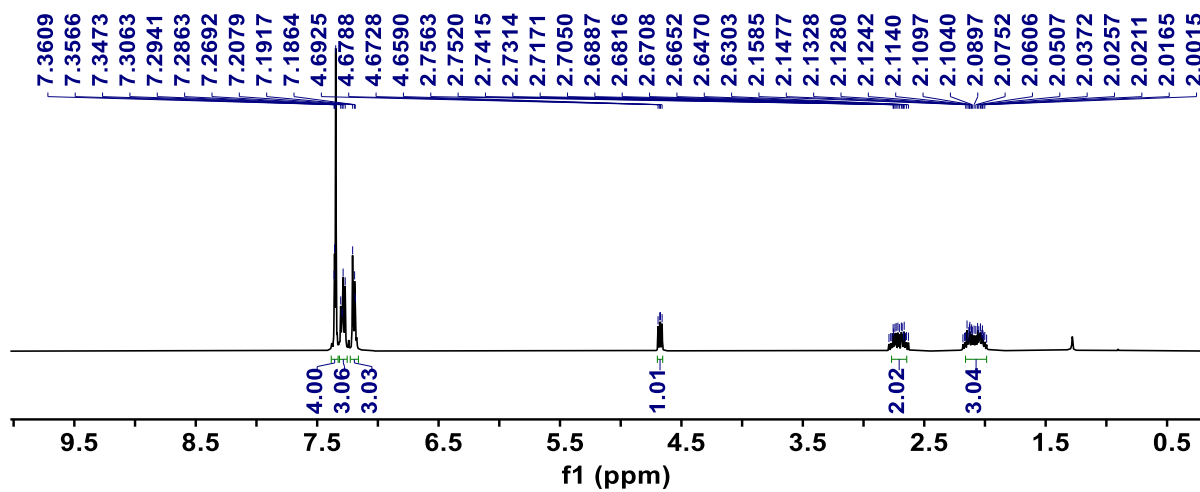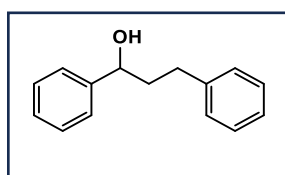

$^{13}\text{C}\{^1\text{H}\}$  NMR (100 MHz,  $\text{CDCl}_3$ ), **22d**

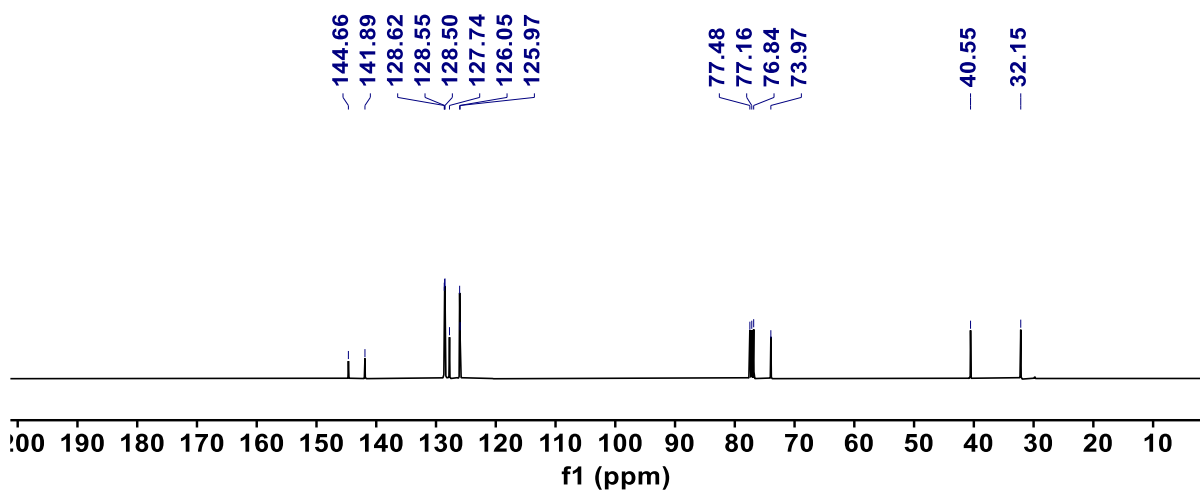

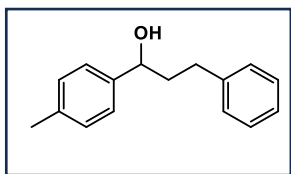

$^1\text{H}$  NMR (400 MHz,  $\text{CDCl}_3$ ), **23d**

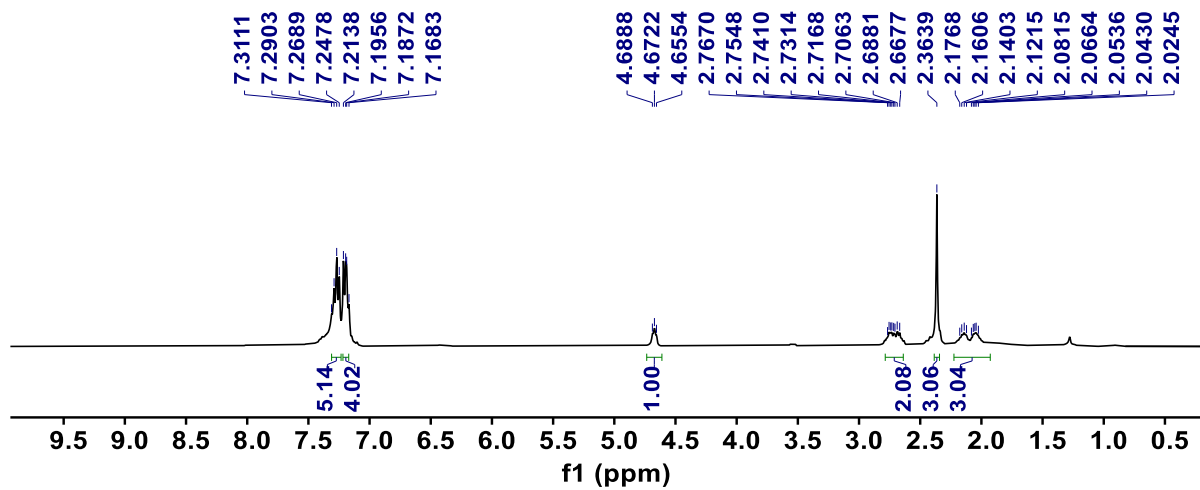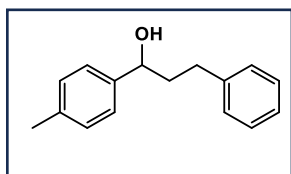

$^{13}\text{C}\{^1\text{H}\}$  NMR (125 MHz,  $\text{CDCl}_3$ ), **23d**

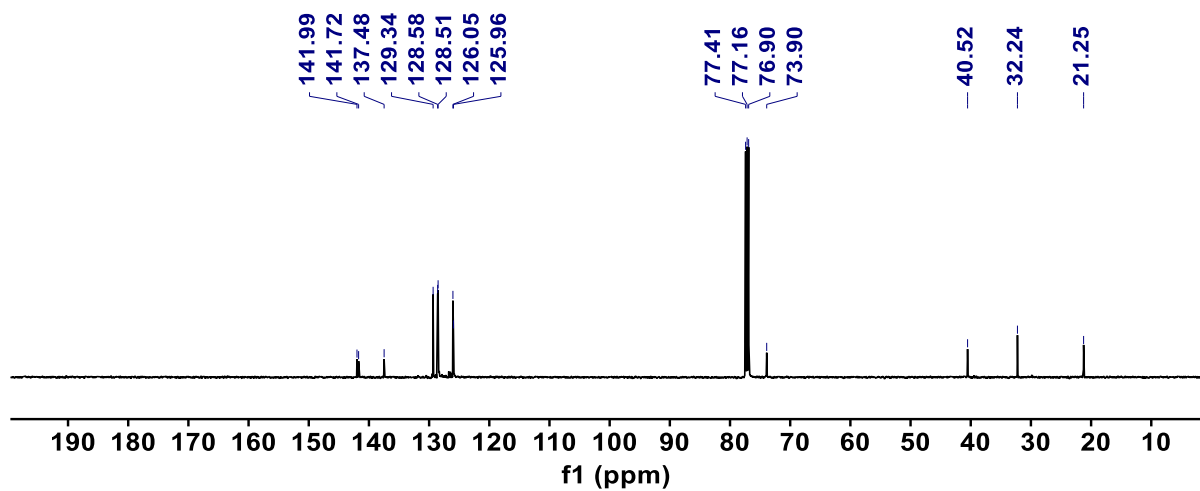



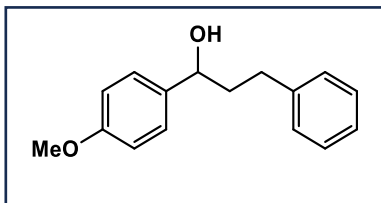

$^1\text{H}$  NMR (400 MHz,  $\text{CDCl}_3$ ), **24d**

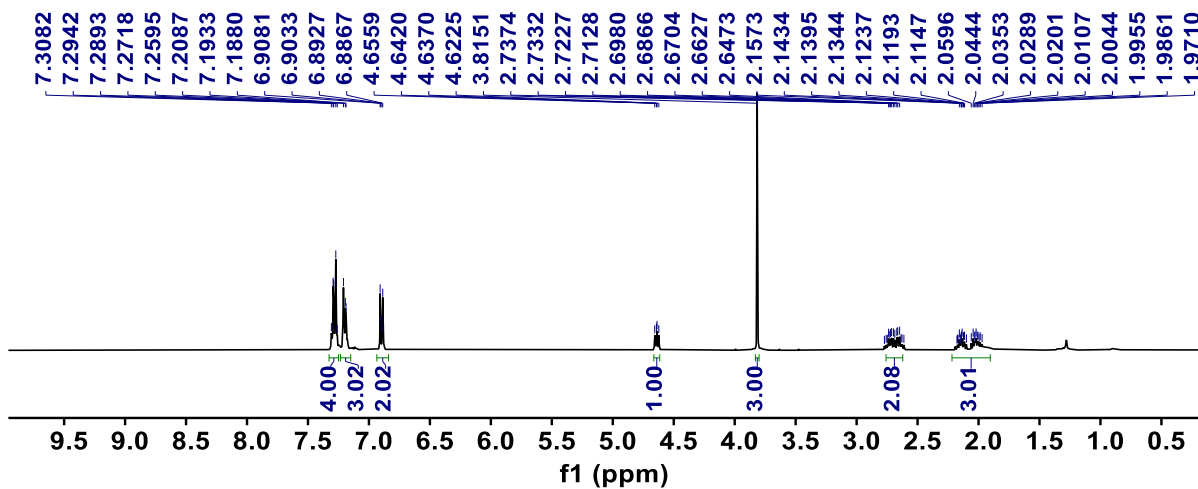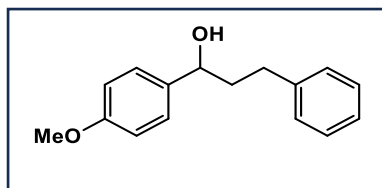

$^{13}\text{C}\{^1\text{H}\}$  NMR (125 MHz,  $\text{CDCl}_3$ ), **24d**

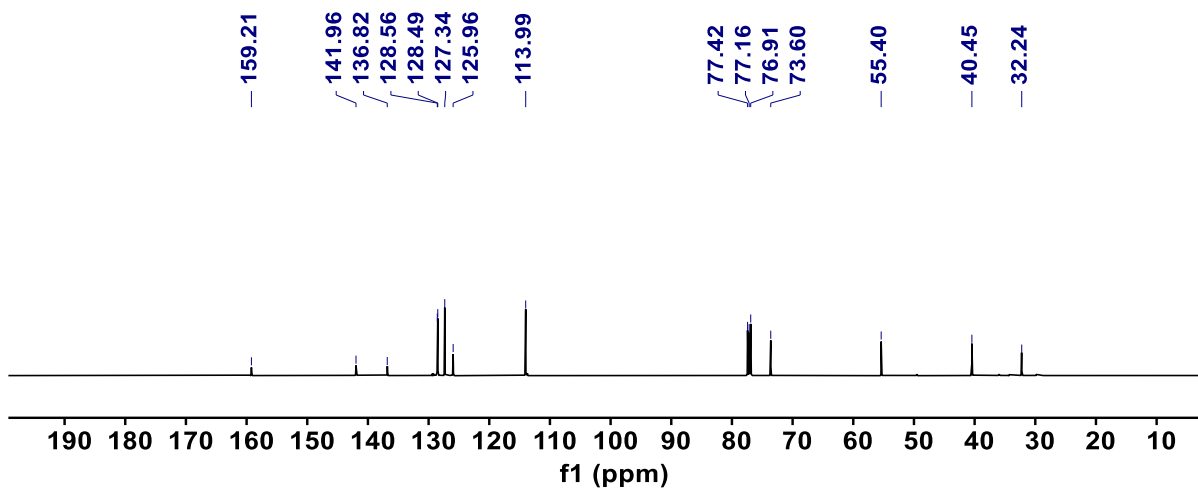

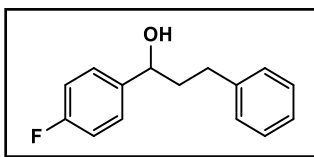

$^1\text{H}$  NMR (400 MHz,  $\text{CDCl}_3$ ), **25d**

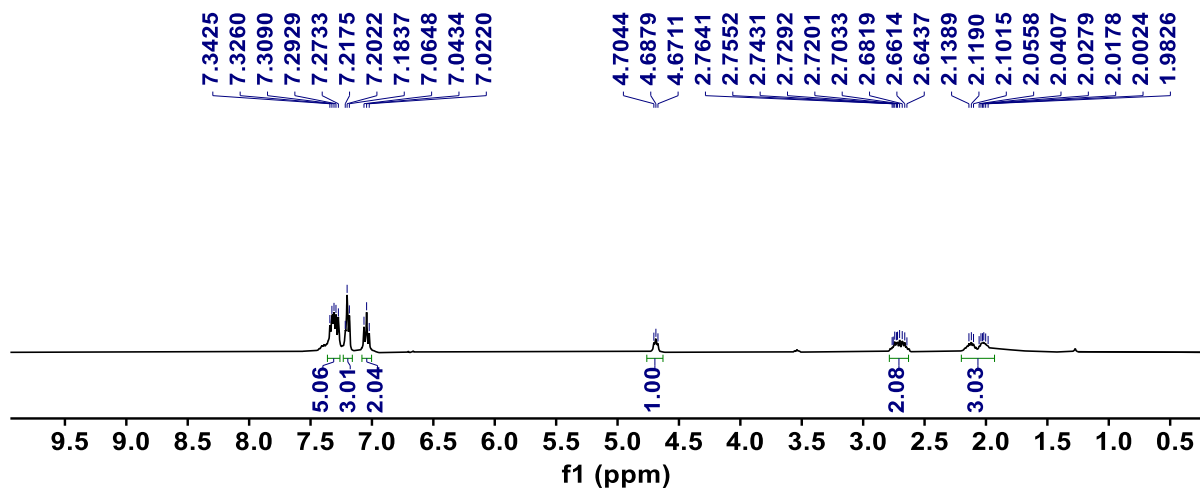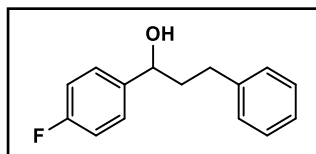

$^{13}\text{C}\{^1\text{H}\}$  NMR (125 MHz,  $\text{CDCl}_3$ ), **25d**

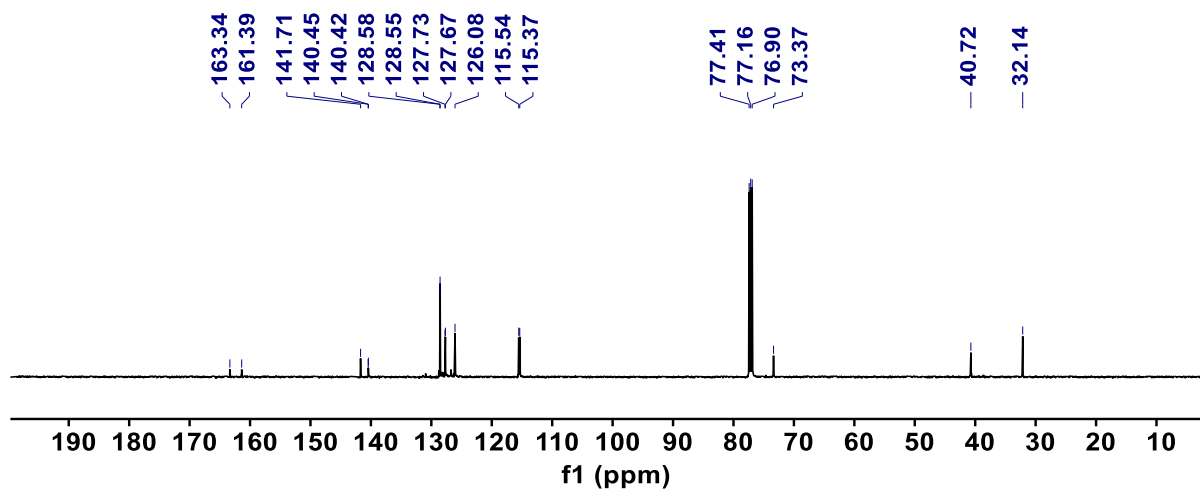

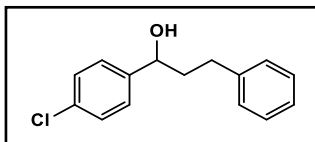

$^1\text{H}$  NMR (400 MHz,  $\text{CDCl}_3$ ), **26d**

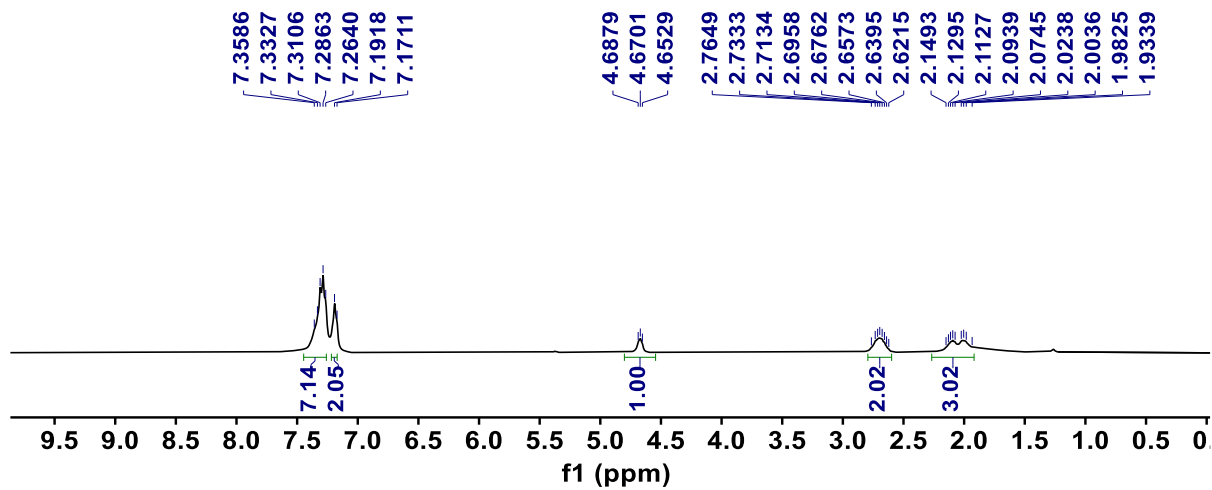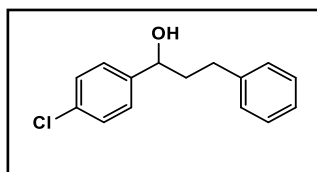

$^{13}\text{C}\{^1\text{H}\}$  NMR (125 MHz,  $\text{CDCl}_3$ ), **26d**

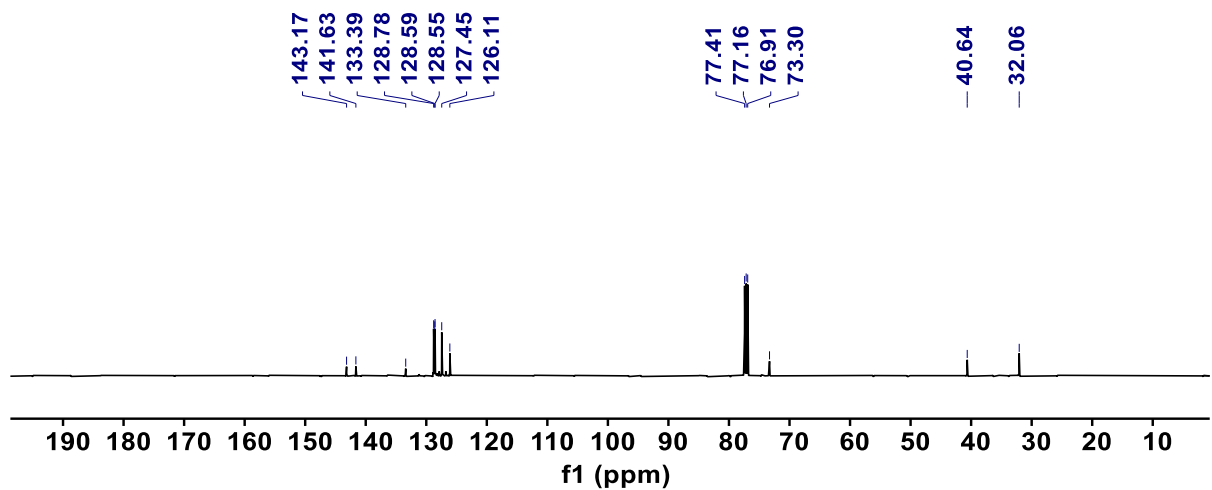

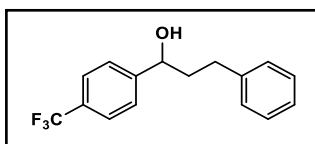

$^1\text{H NMR}$  (400 MHz,  $\text{CDCl}_3$ ), **27d**

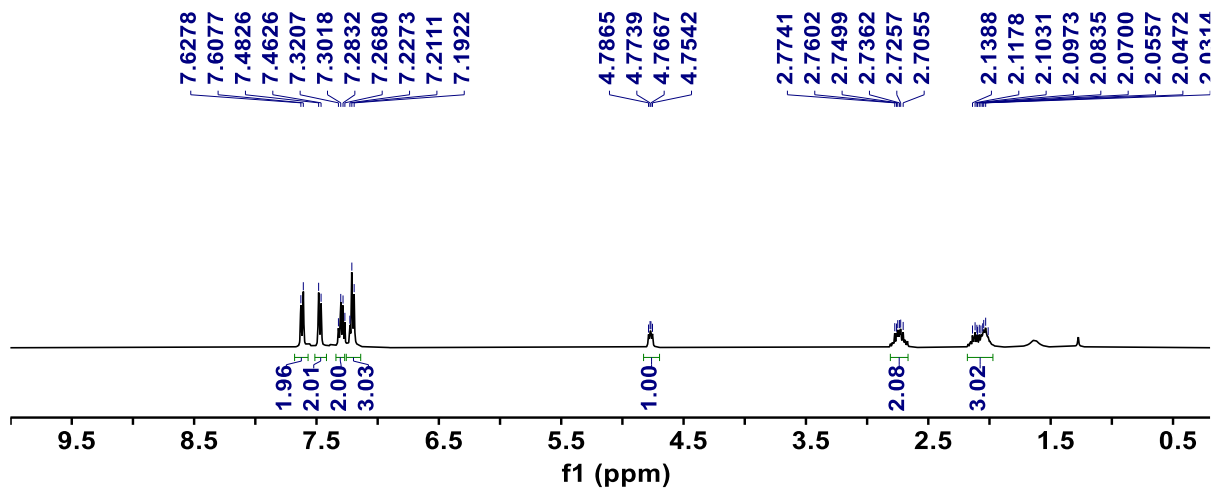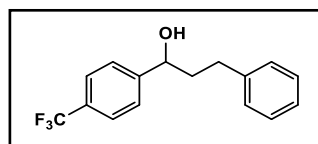

$^{13}\text{C}\{^1\text{H}\}$  NMR (100 MHz,  $\text{CDCl}_3$ ), **27d**

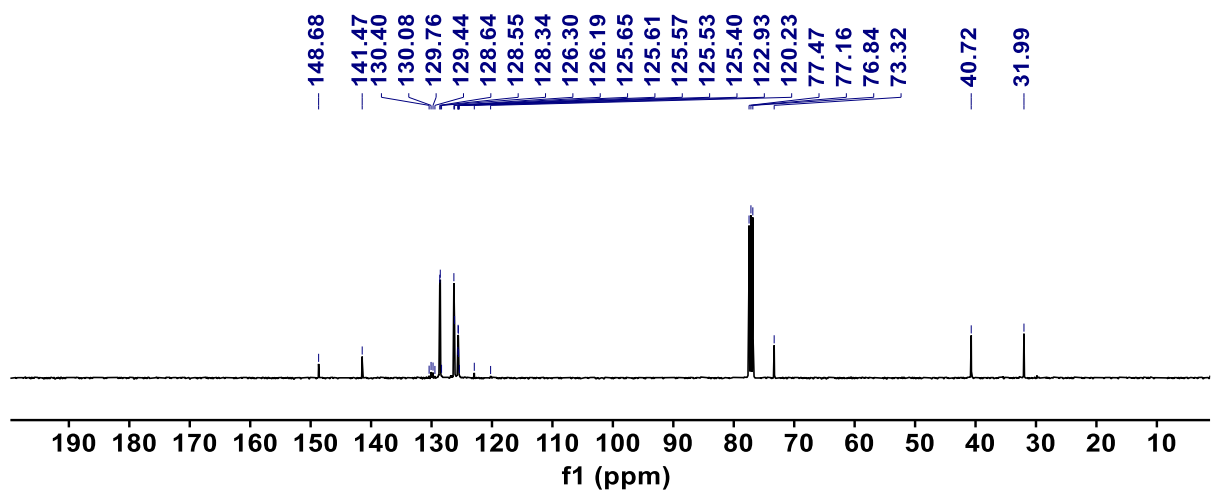

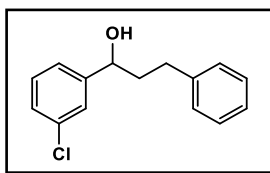

**$^1\text{H}$  NMR (400 MHz,  $\text{CDCl}_3$ ), 28d**

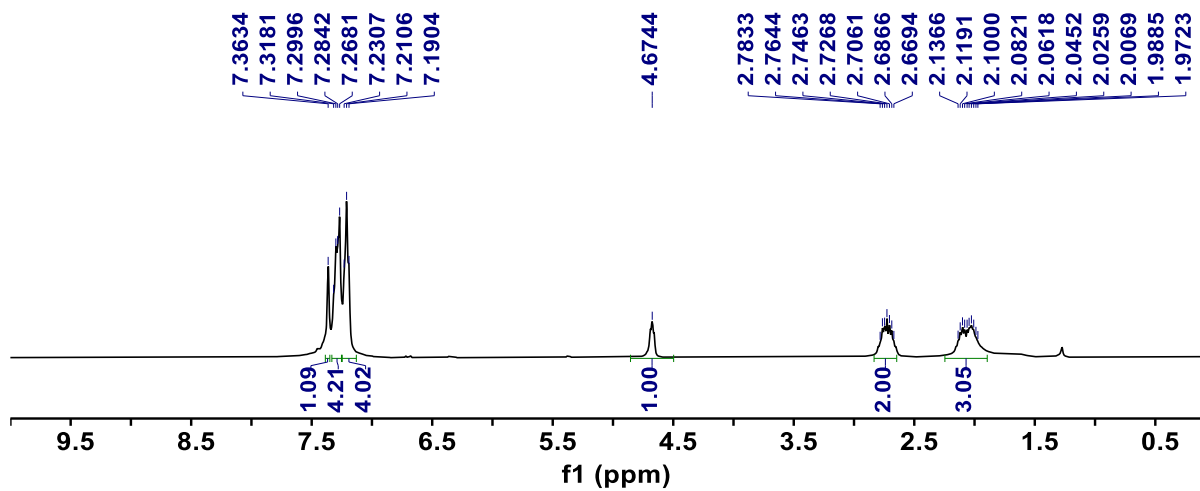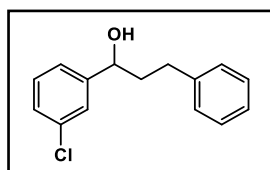

**$^{13}\text{C}\{^1\text{H}\}$  NMR (100 MHz,  $\text{CDCl}_3$ ), 28d**

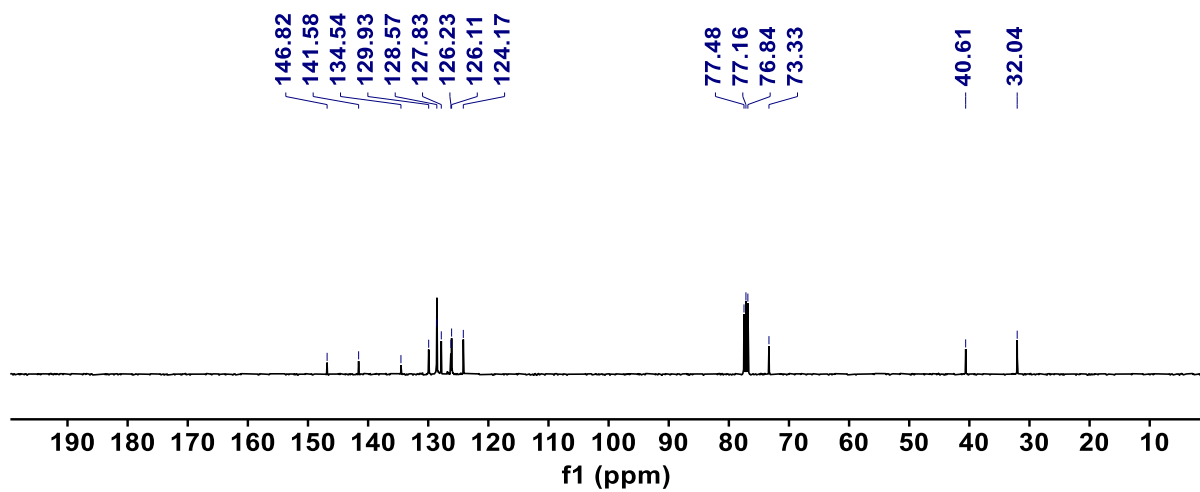

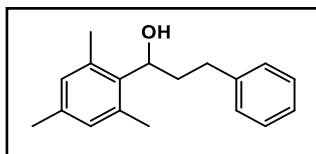

$^1\text{H NMR}$  (500 MHz,  $\text{CDCl}_3$ ), **29d**

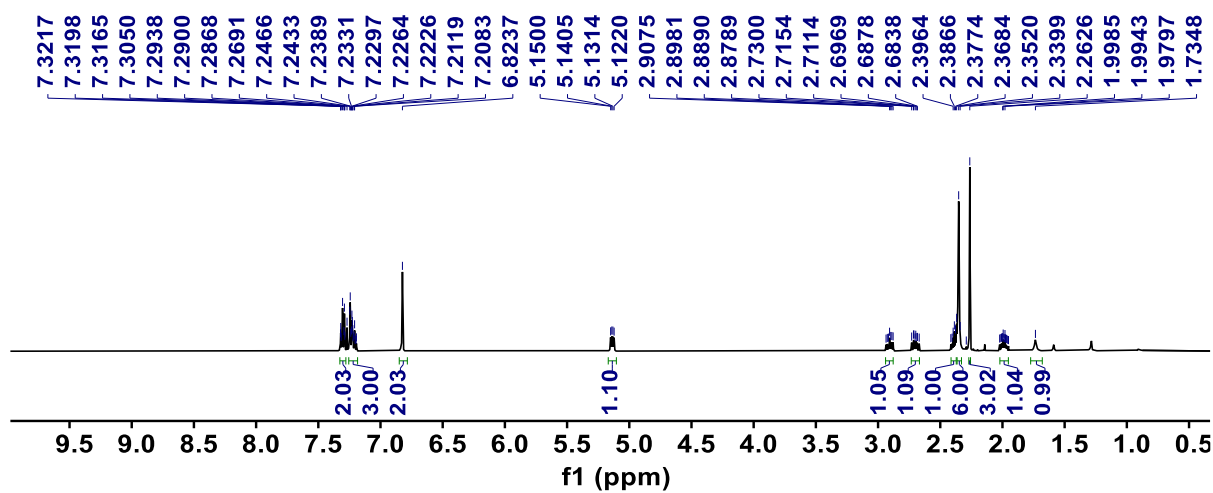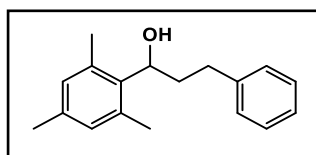

$^{13}\text{C}\{^1\text{H}\}$  NMR (125 MHz,  $\text{CDCl}_3$ ), **29d**

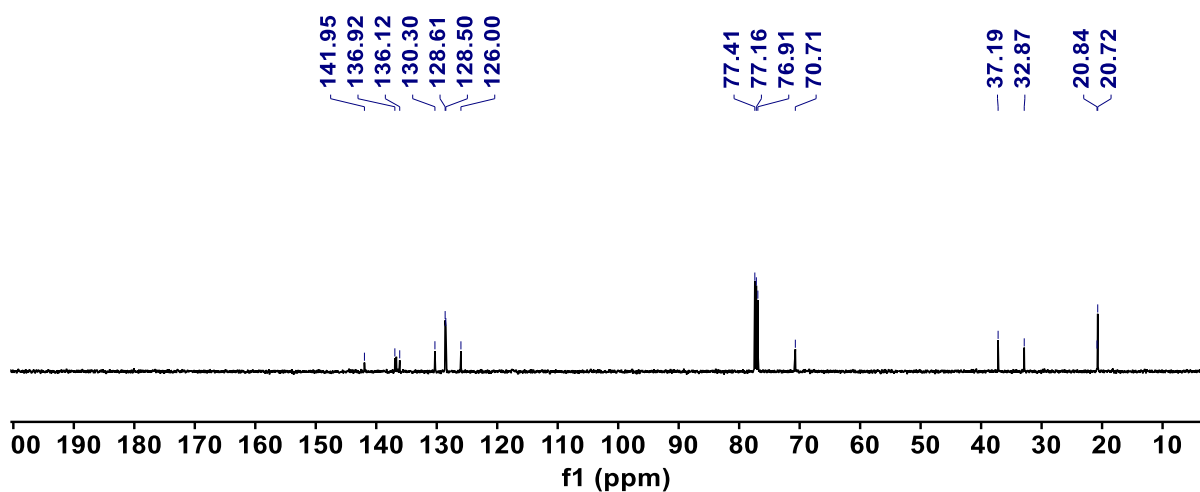

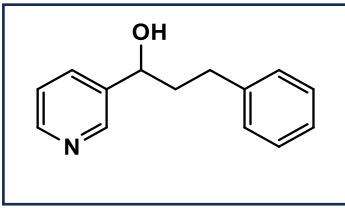

**$^1\text{H}$  NMR (400 MHz,  $\text{CDCl}_3$ ), 30d**

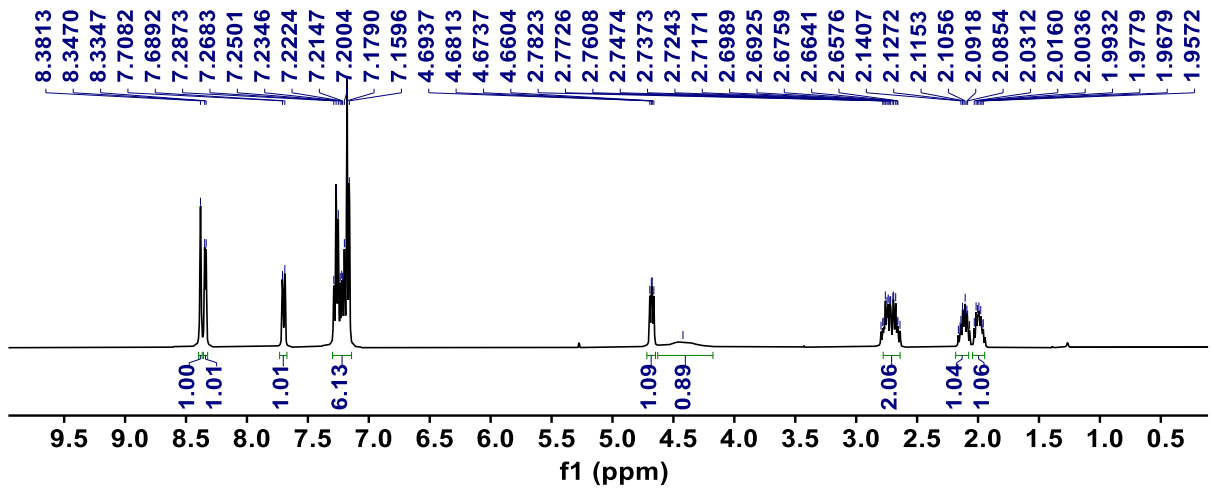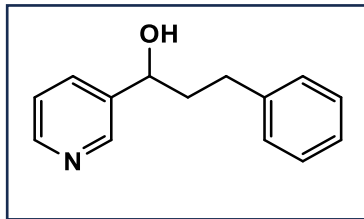

**$^{13}\text{C}\{^1\text{H}\}$  NMR (100 MHz,  $\text{CDCl}_3$ ), 30d**

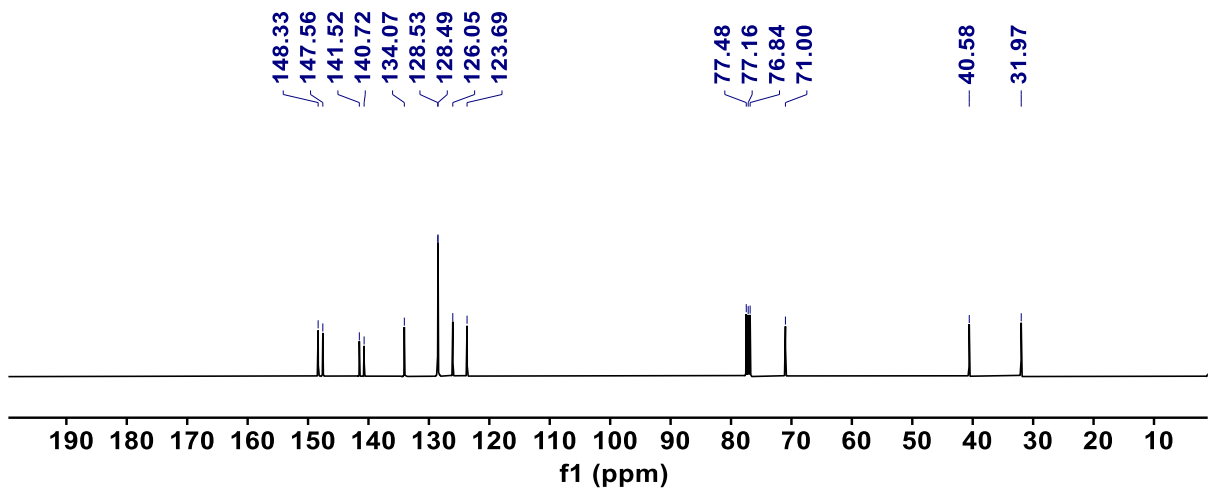

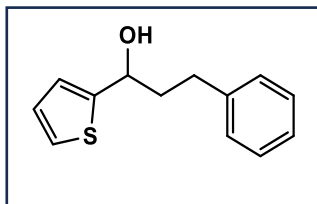

$^1\text{H}$  NMR (400 MHz,  $\text{CDCl}_3$ ), **31d**

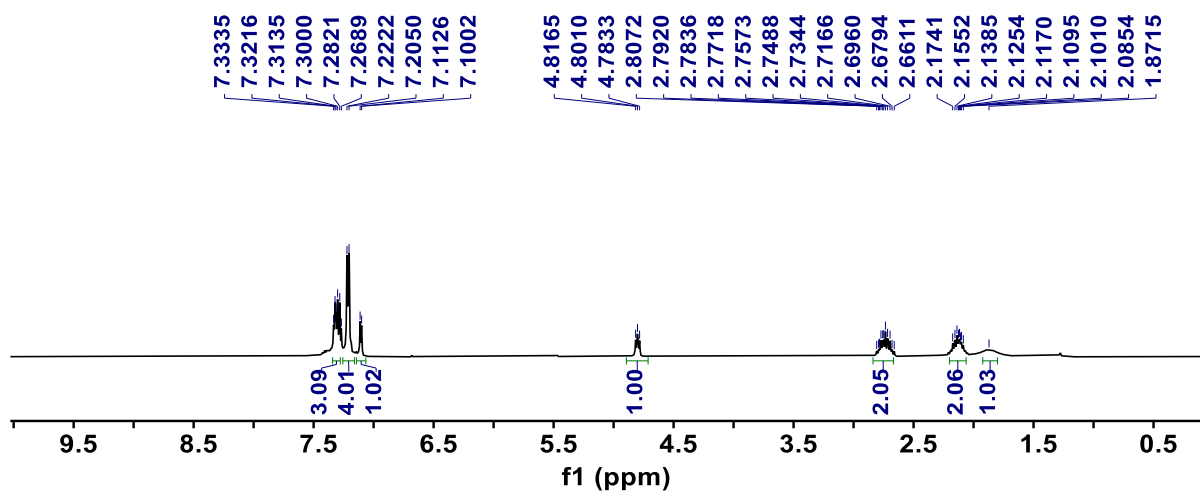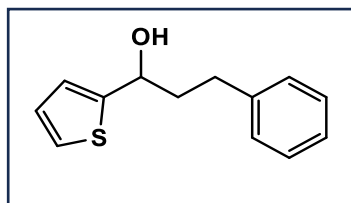

$^{13}\text{C}\{^1\text{H}\}$  NMR (100 MHz,  $\text{CDCl}_3$ ), **31d**

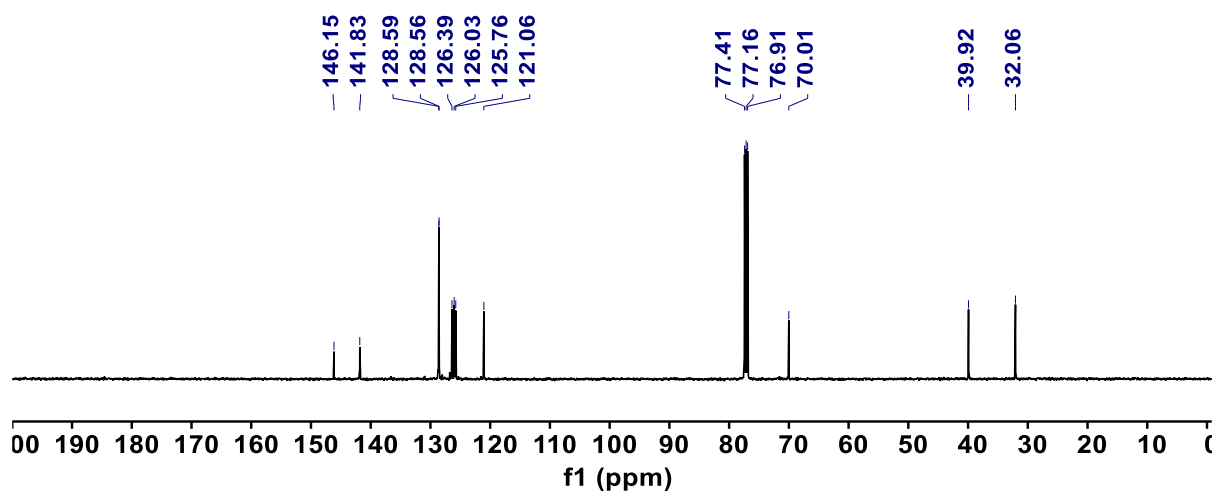



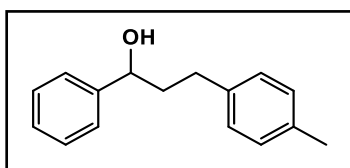

**$^1\text{H}$  NMR (400 MHz,  $\text{CDCl}_3$ ), 32d**

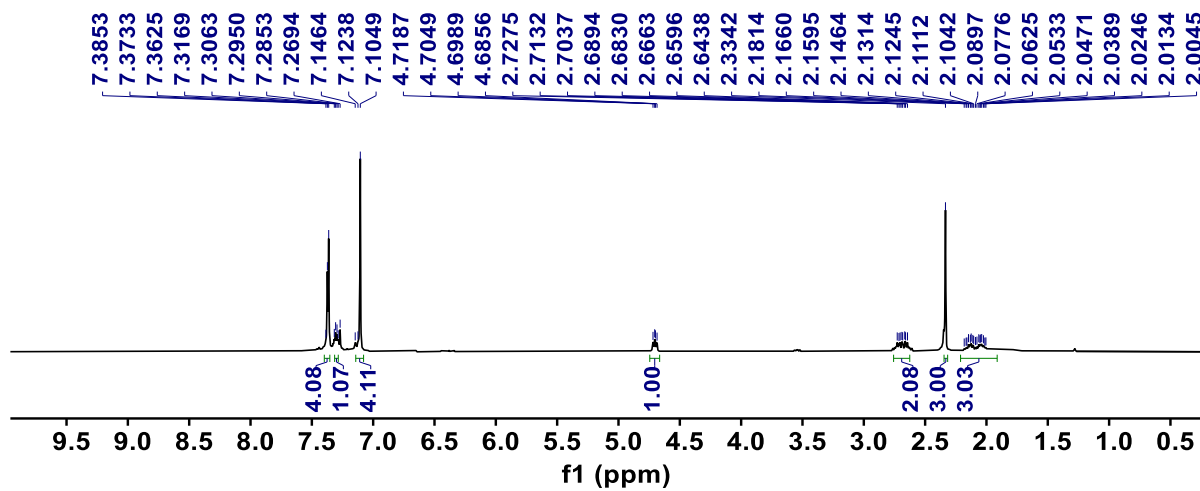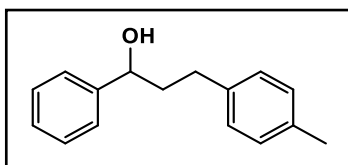

**$^{13}\text{C}\{^1\text{H}\}$  NMR (125 MHz,  $\text{CDCl}_3$ ), 32d**

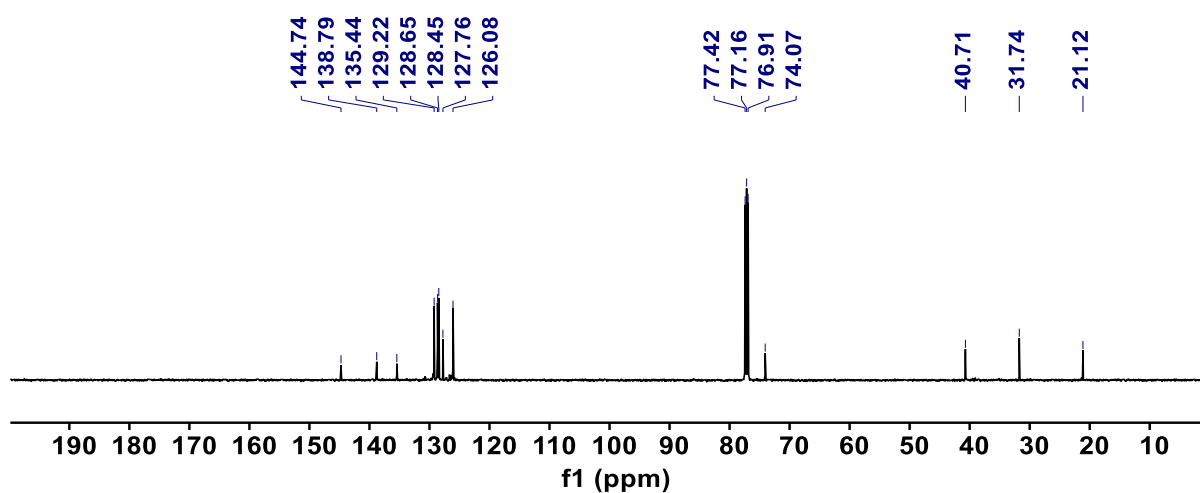

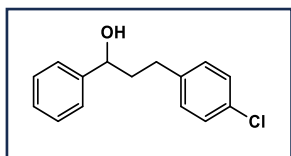

$^1\text{H NMR}$  (400 MHz,  $\text{CDCl}_3$ ), **33d**

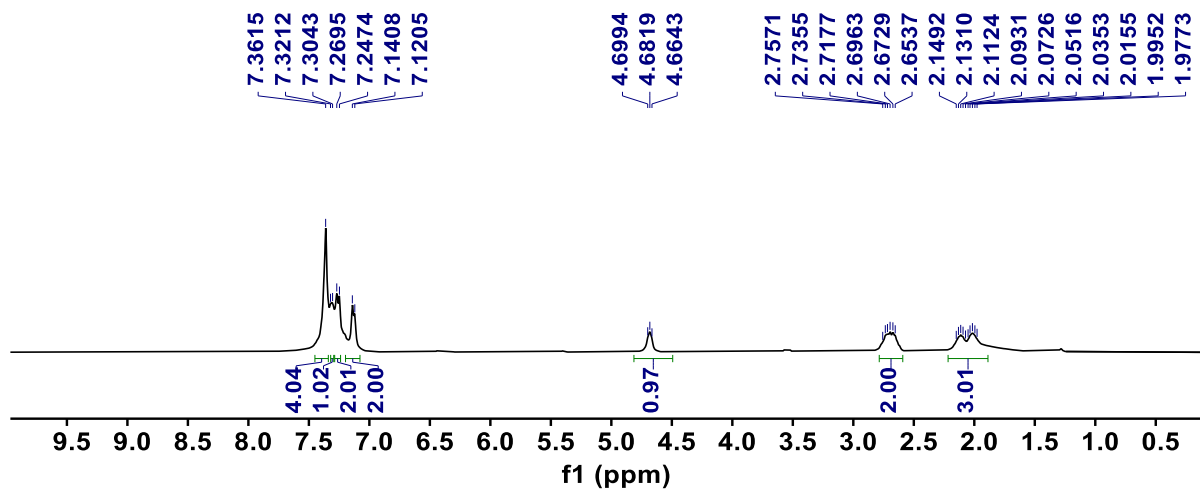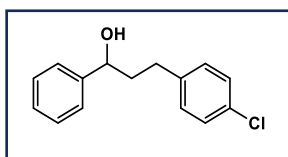

$^{13}\text{C}\{^1\text{H}\}$  NMR (125 MHz,  $\text{CDCl}_3$ ), **33d**

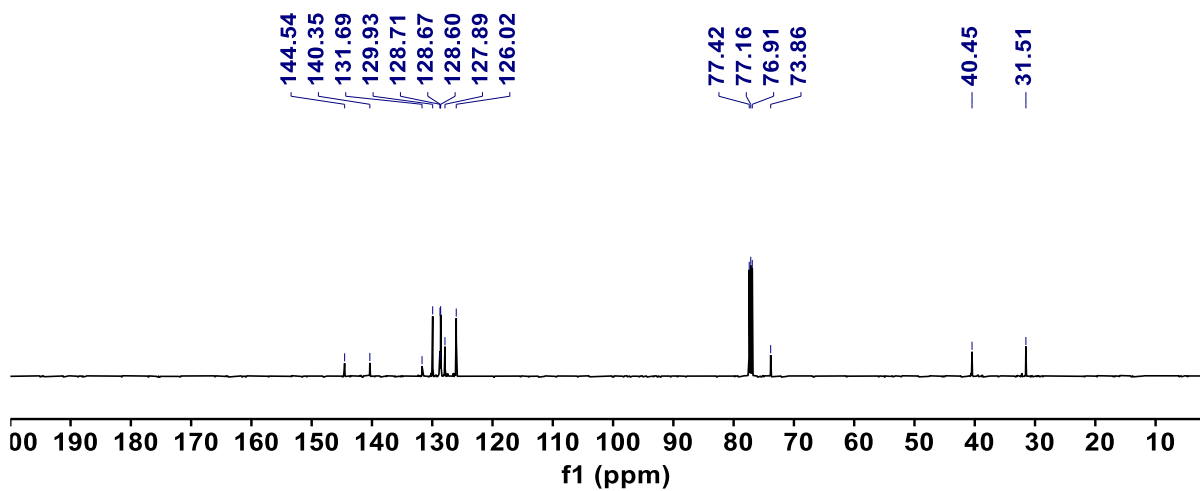

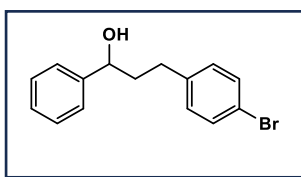

$^1\text{H}$  NMR (400 MHz,  $\text{CDCl}_3$ ), **34d**

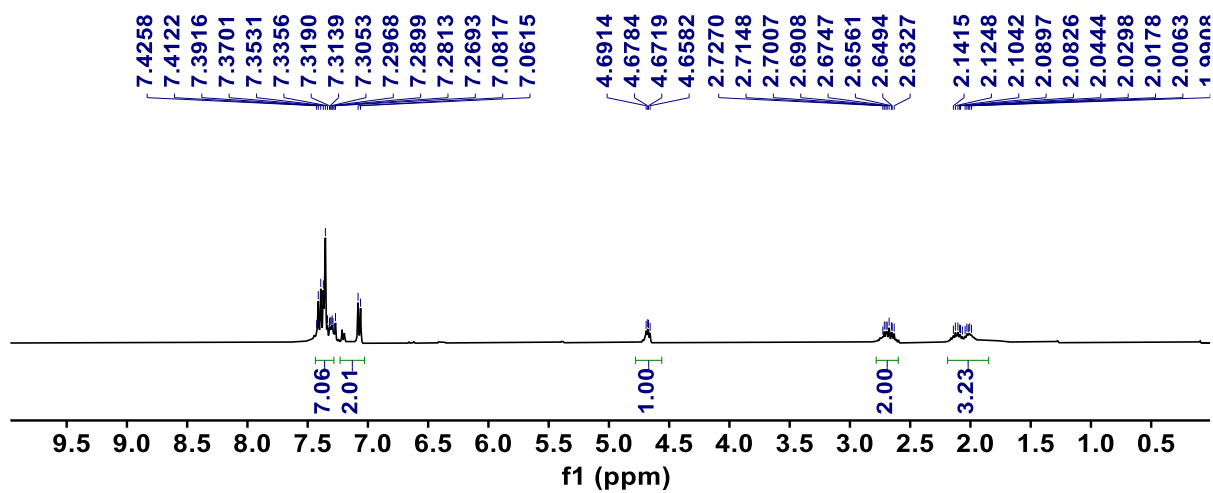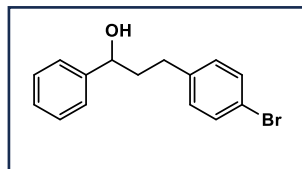

$^{13}\text{C}\{^1\text{H}\}$  NMR (100 MHz,  $\text{CDCl}_3$ ), **34d**

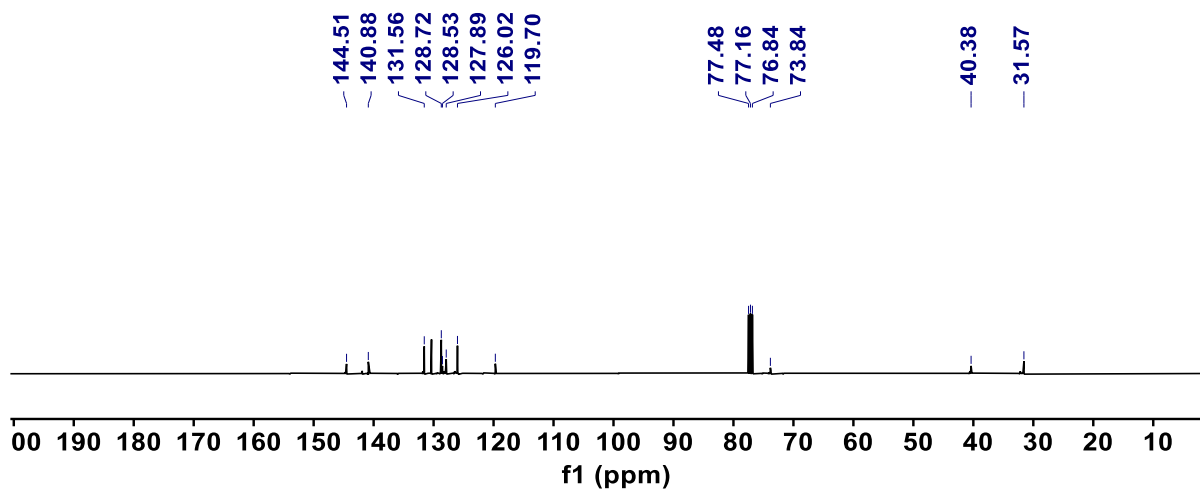

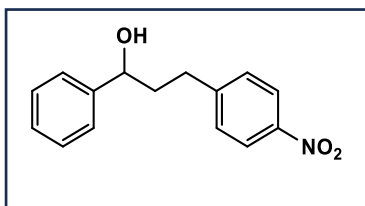

**$^1\text{H}$  NMR (500 MHz,  $\text{CDCl}_3$ ), 35d**

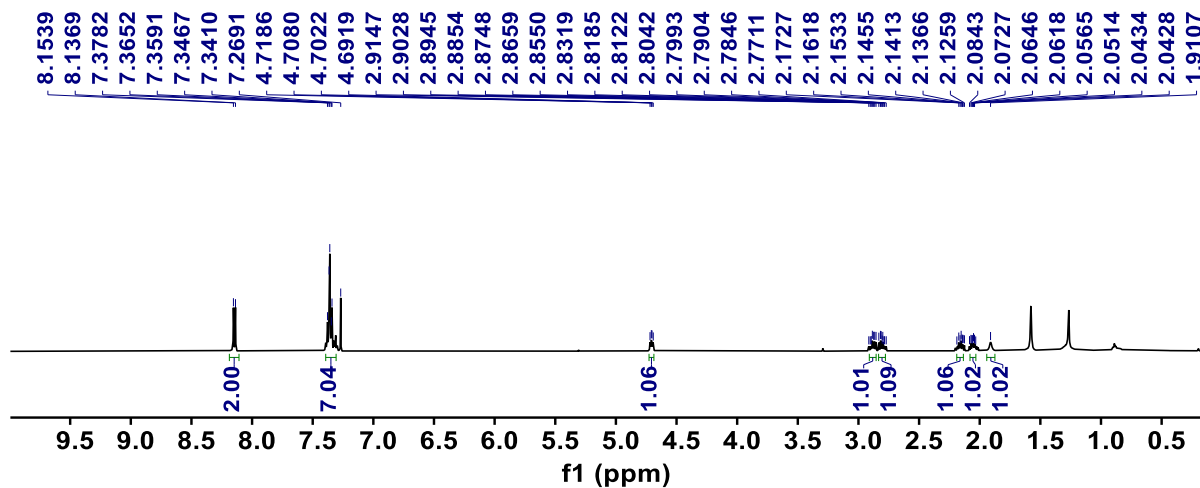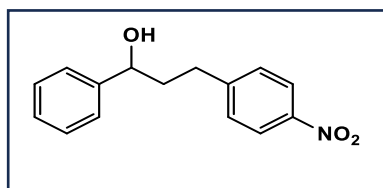

**$^{13}\text{C}\{^1\text{H}\}$  NMR (125 MHz,  $\text{CDCl}_3$ ), 35d**

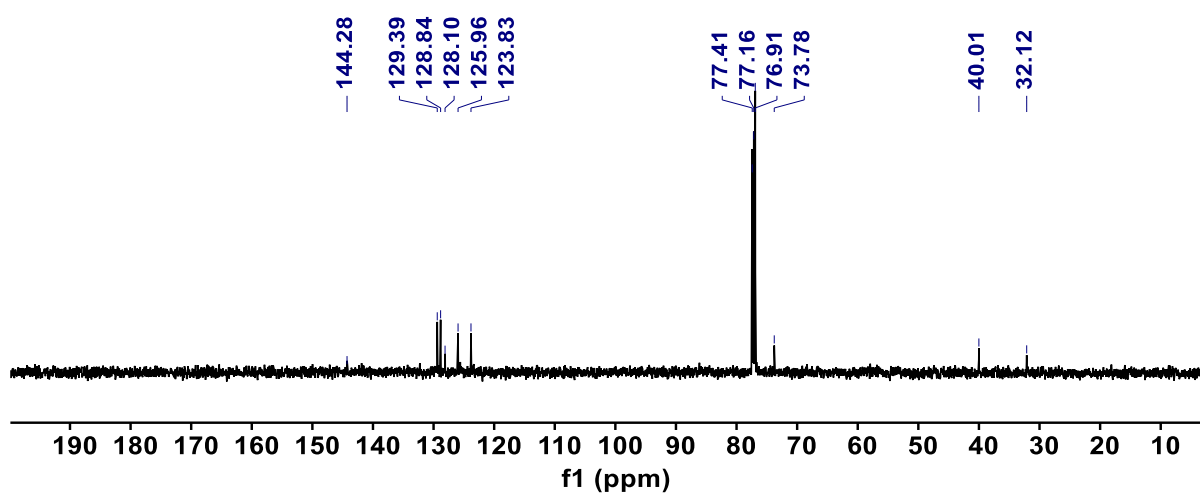

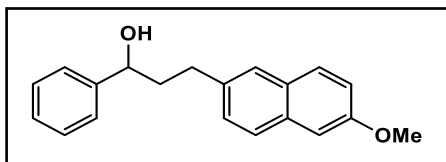

$^1\text{H}$  NMR (500 MHz,  $\text{CDCl}_3$ ), **36d**

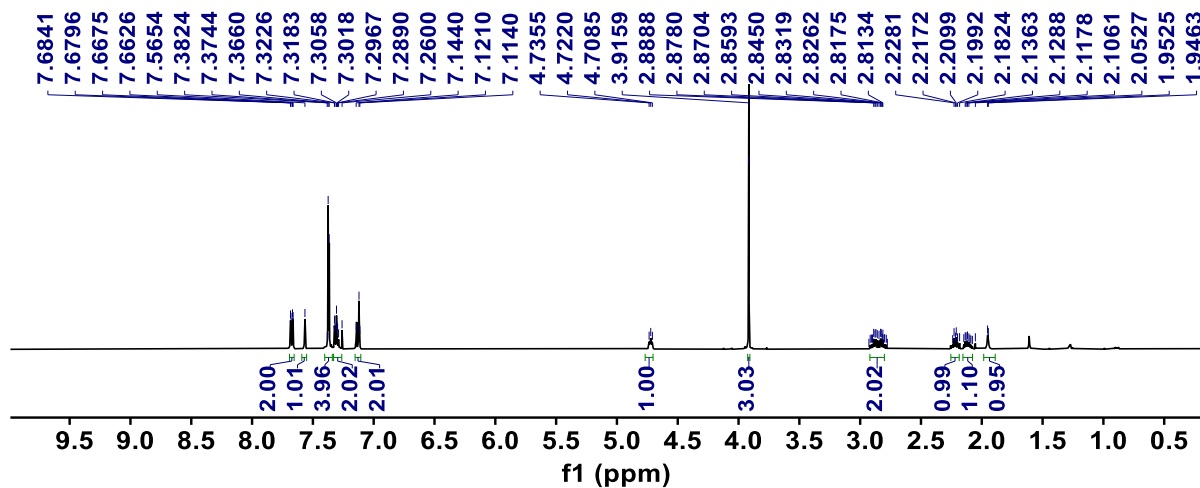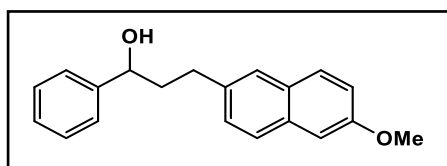

$^{13}\text{C}\{^1\text{H}\}$  NMR (100 MHz,  $\text{CDCl}_3$ ), **36d**

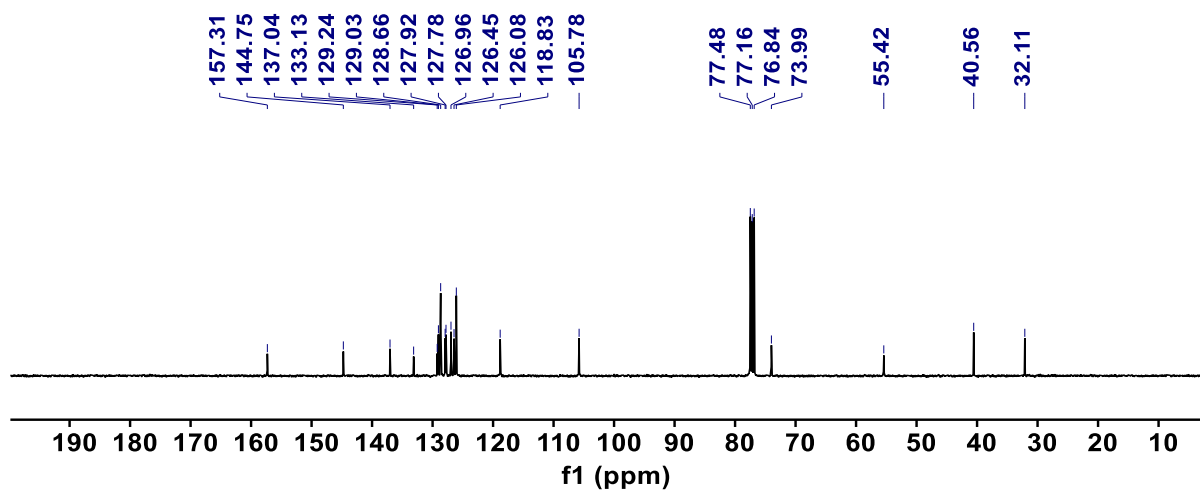

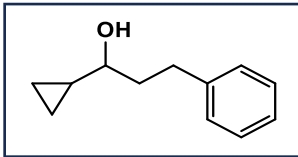

**$^1\text{H}$  NMR (400 MHz,  $\text{CDCl}_3$ ), **37d****

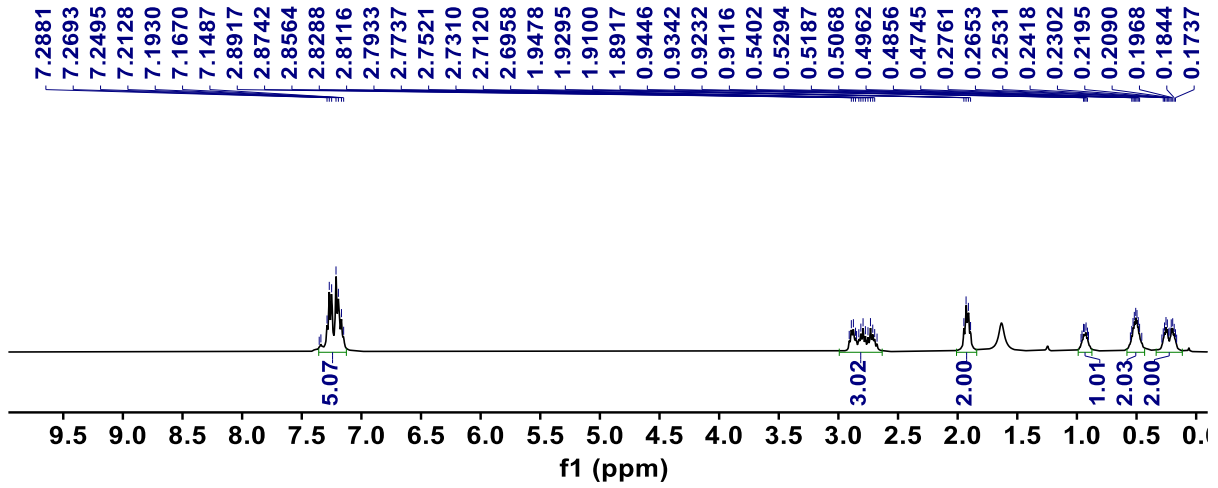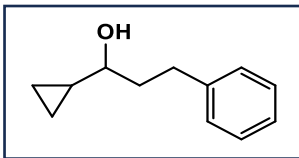

**$^{13}\text{C}\{^1\text{H}\}$  NMR (125 MHz,  $\text{CDCl}_3$ ), **37d****

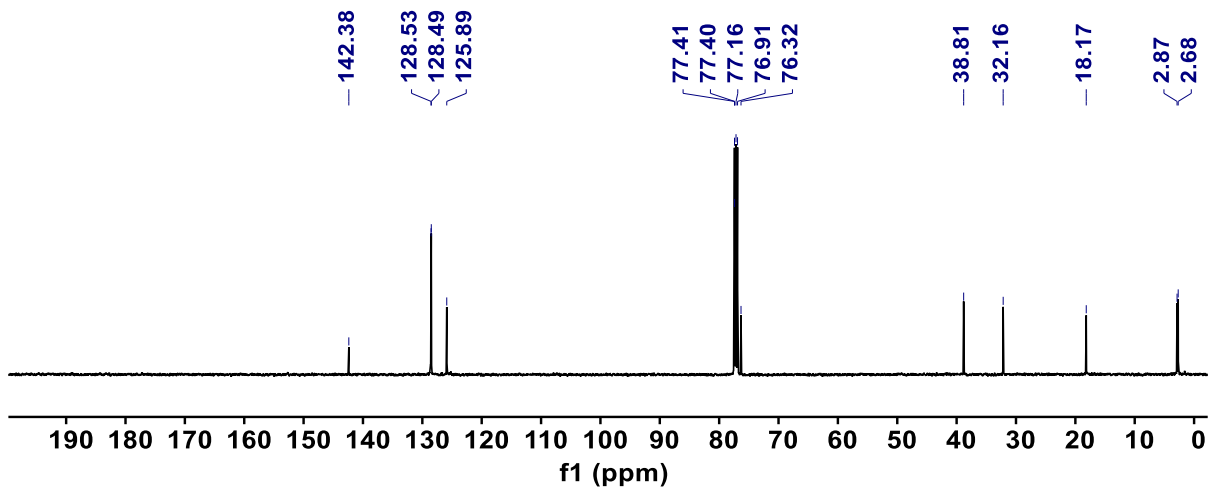

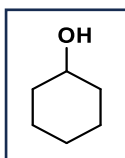

$^1\text{H}$  NMR (400 MHz,  $\text{CDCl}_3$ ), 38d

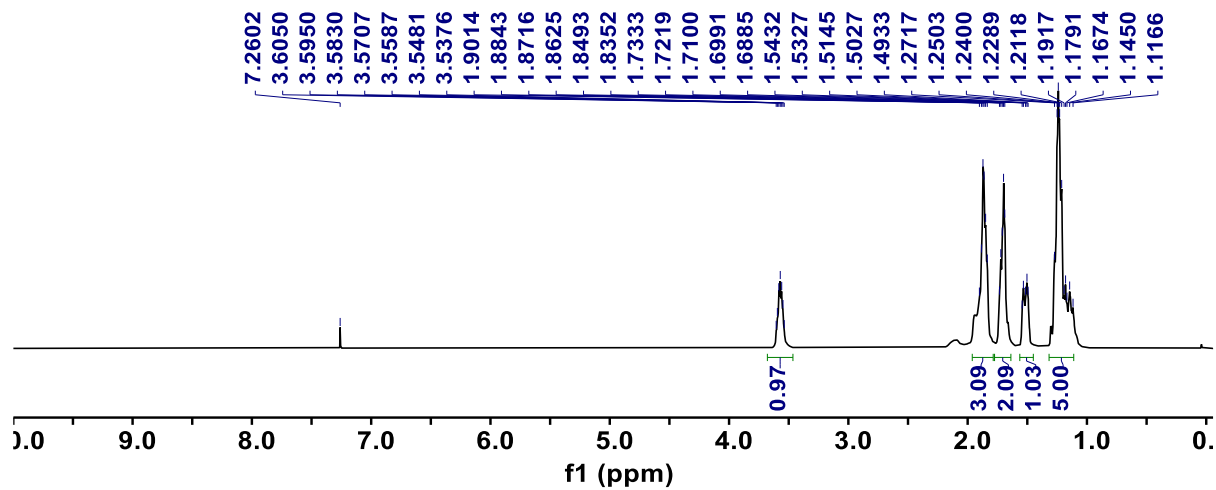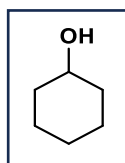

$^{13}\text{C}\{^1\text{H}\}$  NMR (100 MHz,  $\text{CDCl}_3$ ), 38d

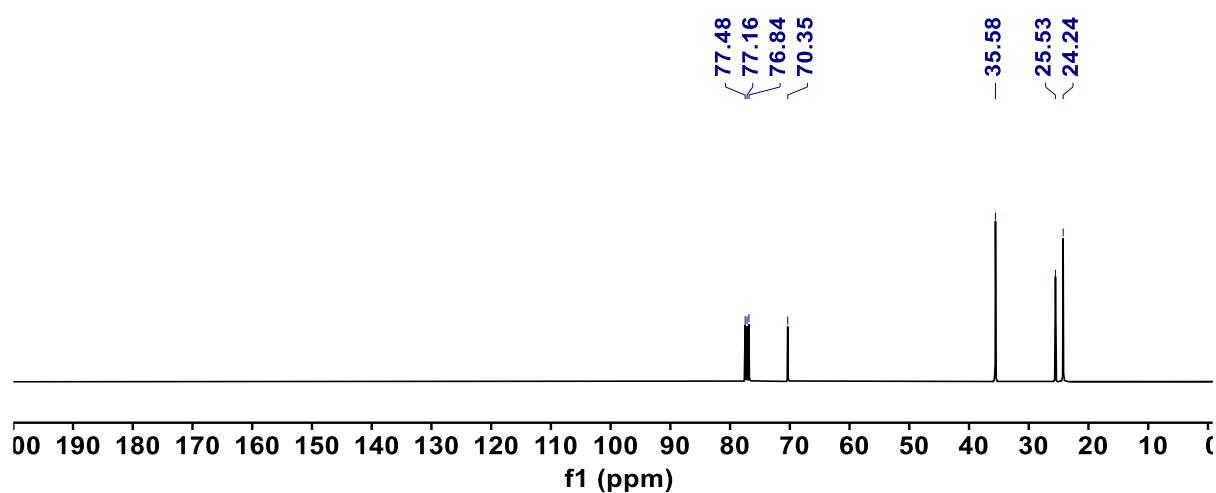

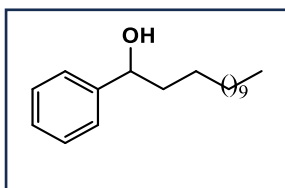

$^1\text{H NMR}$  (500 MHz,  $\text{CDCl}_3$ ), **39d**

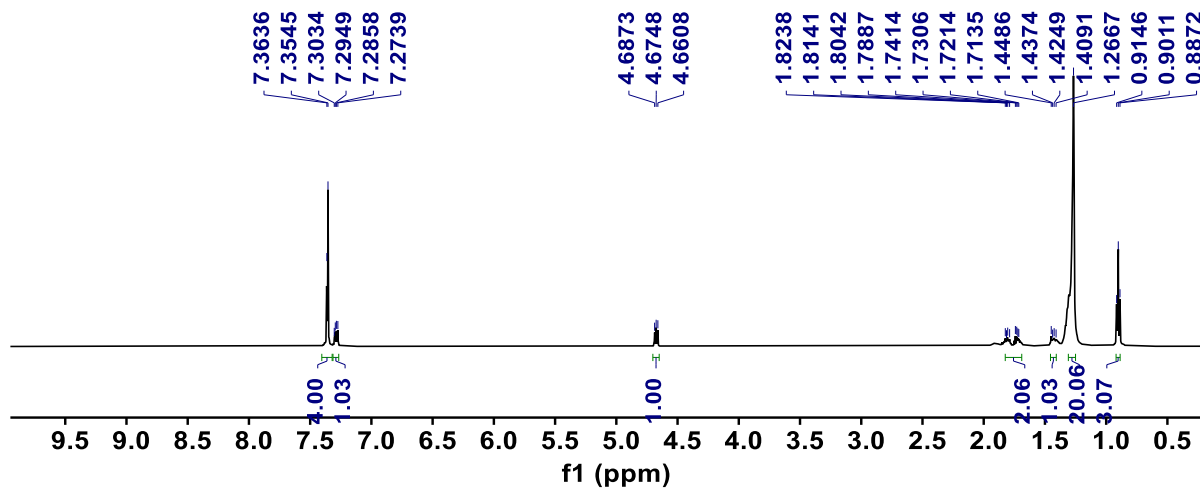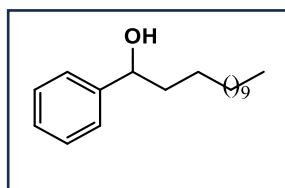

$^{13}\text{C}\{^1\text{H}\}$  NMR (100 MHz,  $\text{CDCl}_3$ ), **39d**

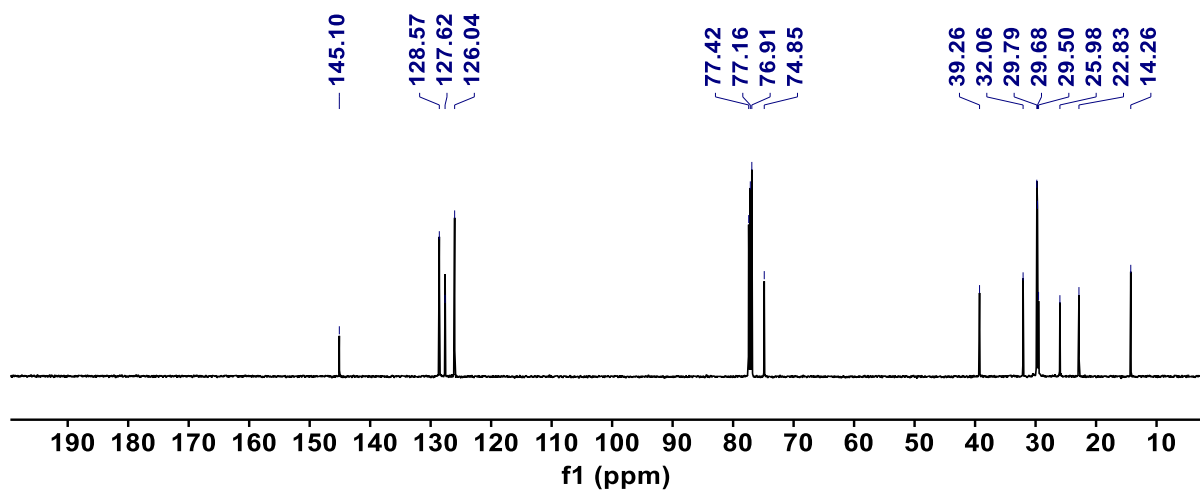



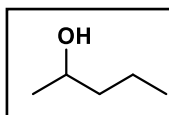

$^1\text{H}$  NMR (400 MHz,  $\text{CDCl}_3$ ), **40d**

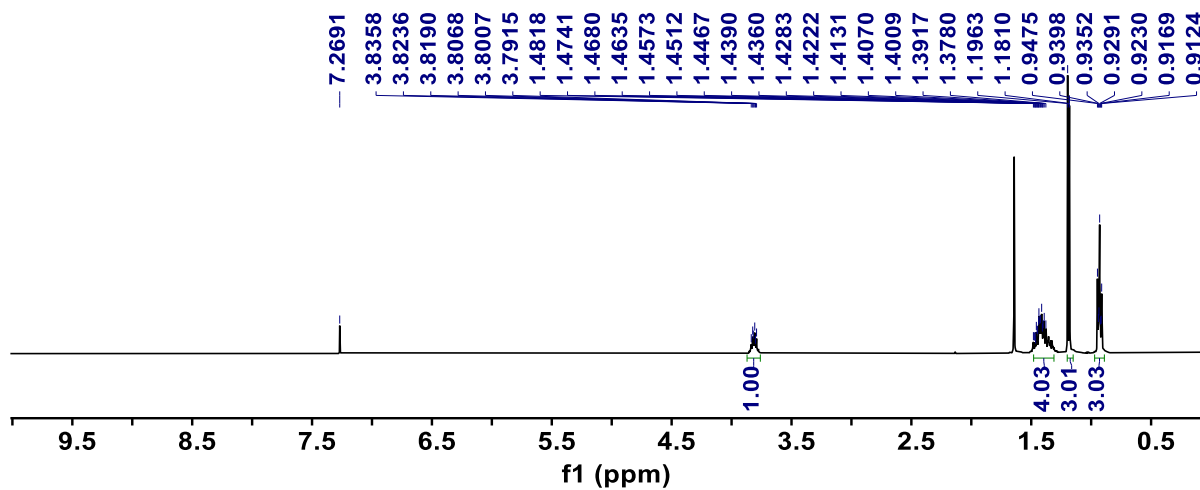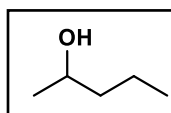

$^{13}\text{C}\{^1\text{H}\}$  NMR (100 MHz,  $\text{CDCl}_3$ ), **40d**

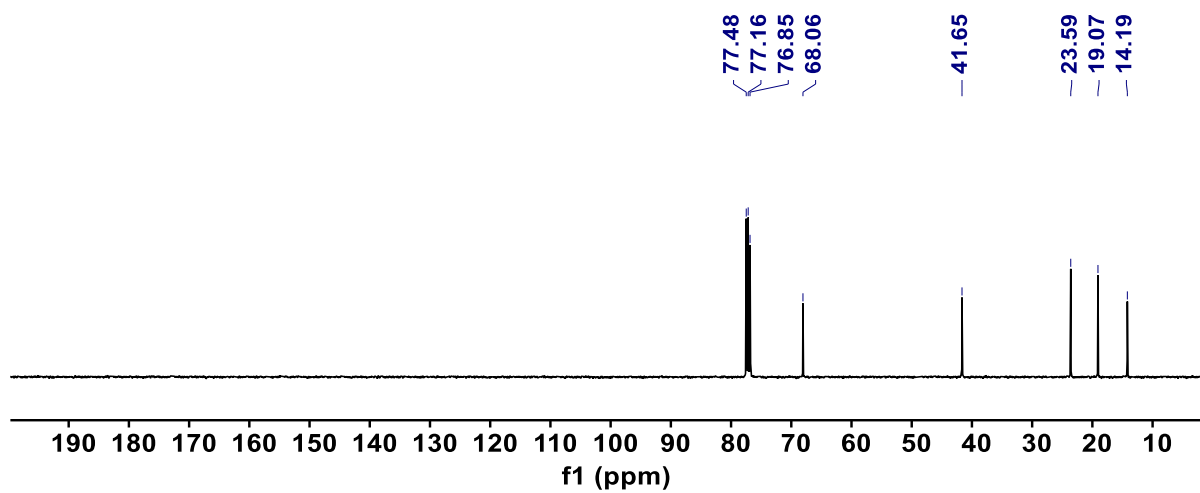

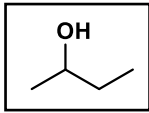

$^1\text{H}$  NMR (400 MHz,  $\text{CDCl}_3$ ), **41d**

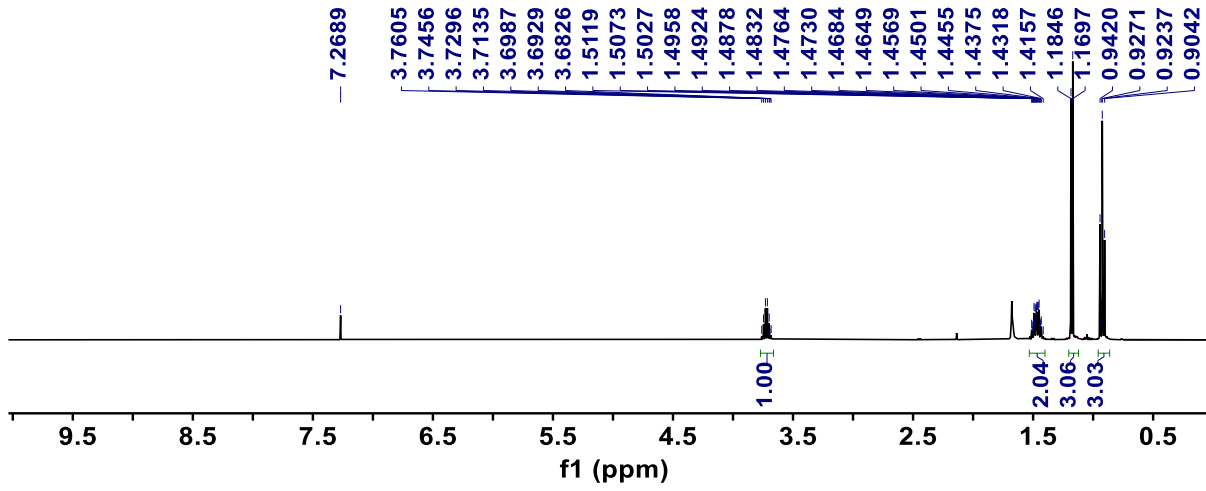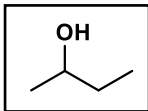

$^{13}\text{C}\{^1\text{H}\}$  NMR (100 MHz,  $\text{CDCl}_3$ ), **41d**

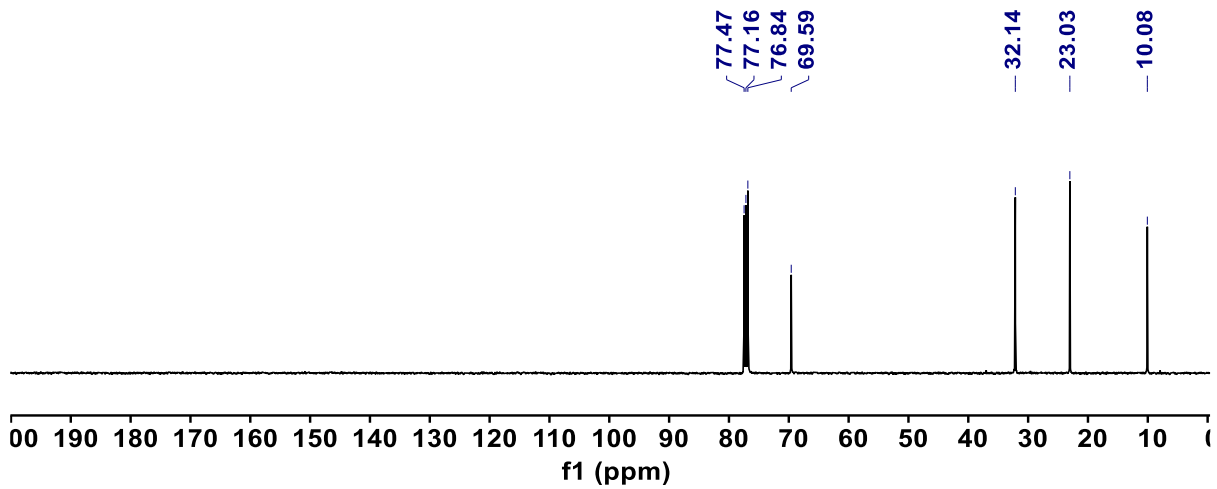

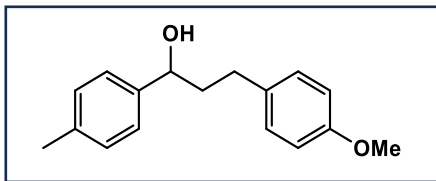

$^1\text{H}$  NMR (500 MHz,  $\text{CDCl}_3$ ), 42d

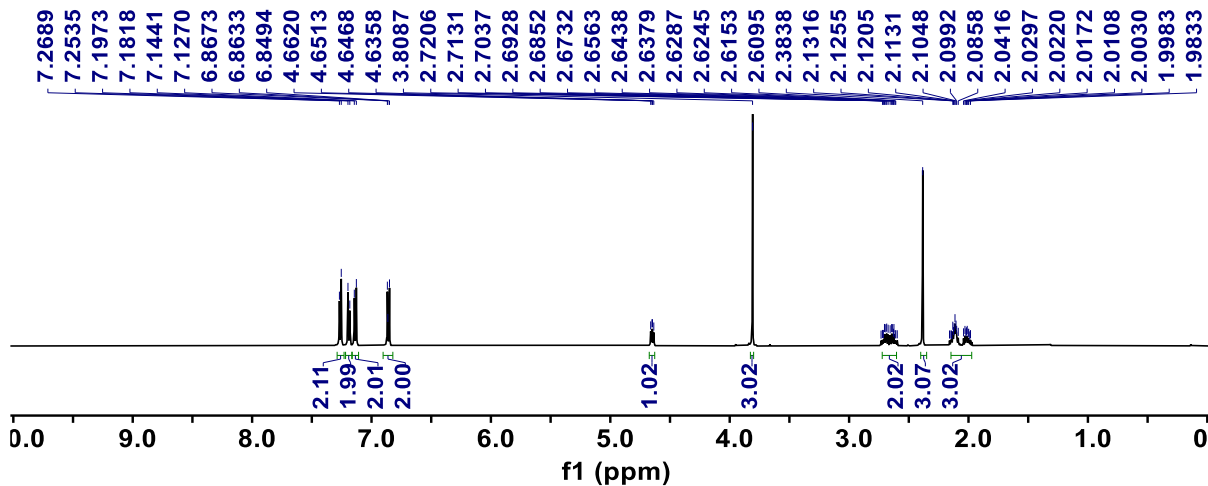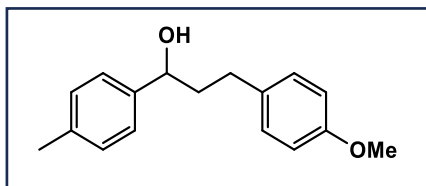

$^{13}\text{C}\{^1\text{H}\}$  NMR (125 MHz,  $\text{CDCl}_3$ ), 42d

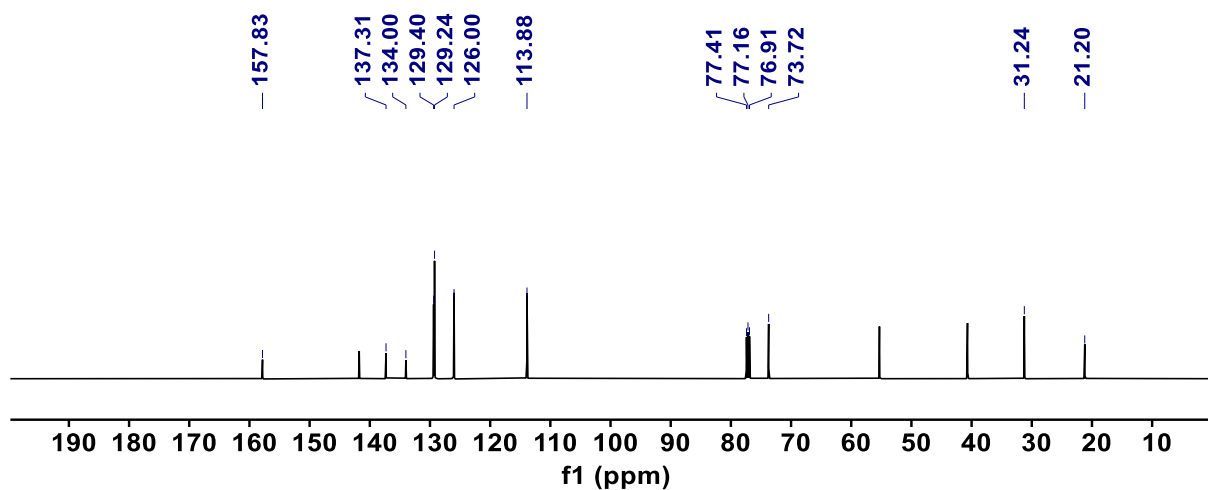

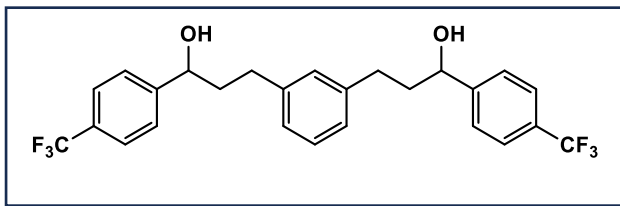

<sup>1</sup>H NMR (500 MHz, CDCl<sub>3</sub>), 43d

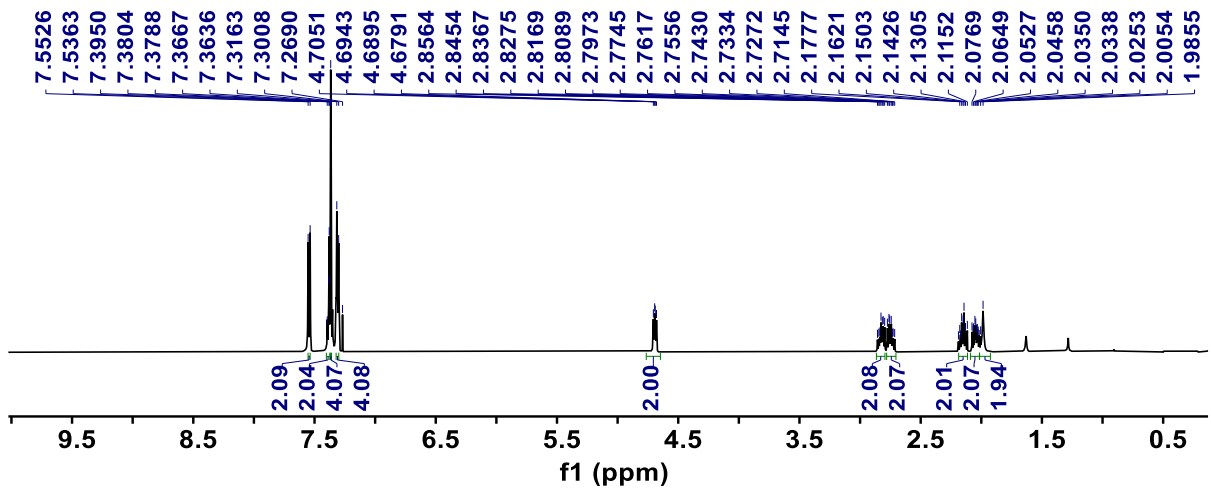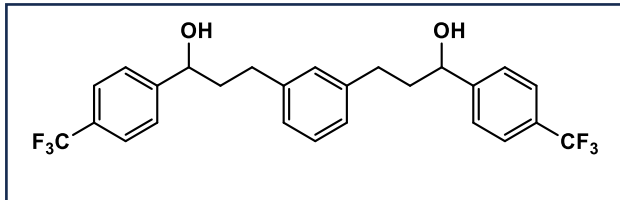

<sup>13</sup>C{<sup>1</sup>H} NMR (125 MHz, CDCl<sub>3</sub>), 43d

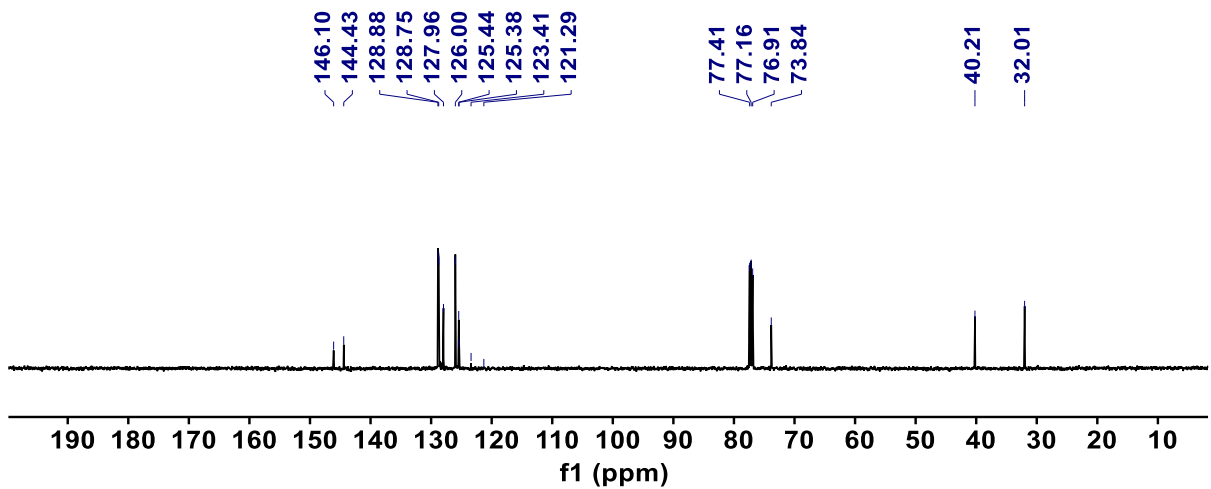

### 13. Copies of $^{19}\text{F}$ NMR Spectra of Products

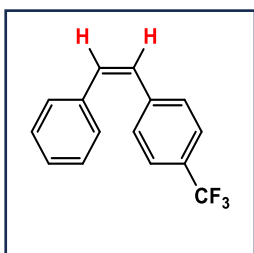

$^{19}\text{F}\{^1\text{H}\}$  NMR (470 MHz,  $\text{CDCl}_3$ ), **4b**

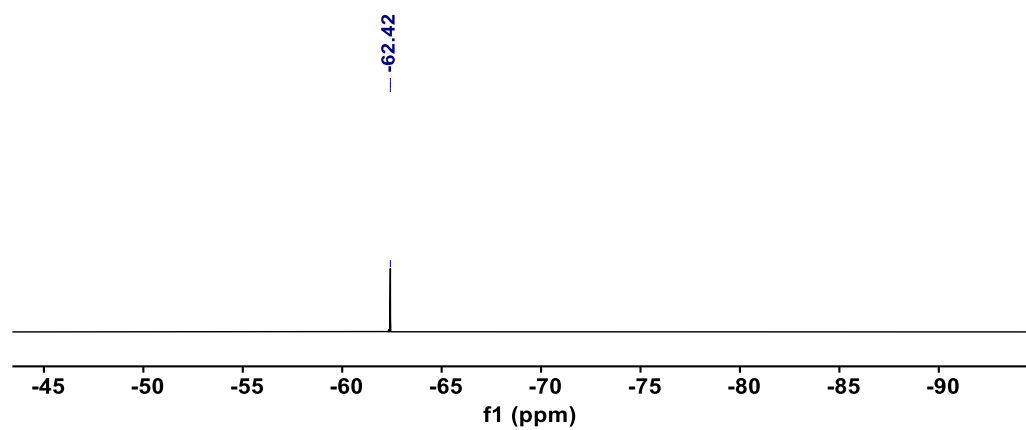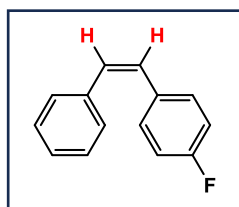

$^{19}\text{F}\{^1\text{H}\}$  NMR (470 MHz,  $\text{CDCl}_3$ ), **5b**

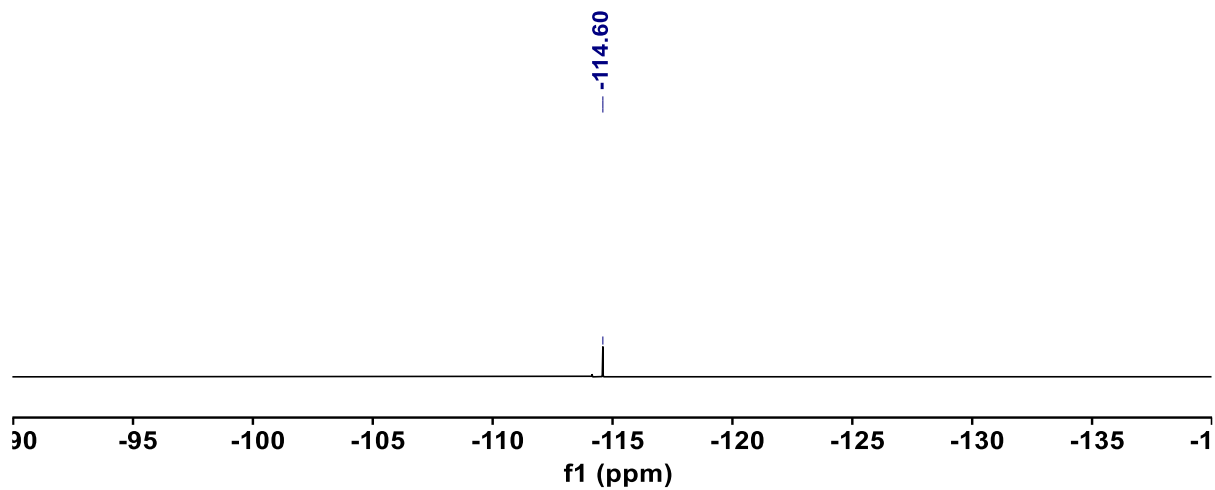

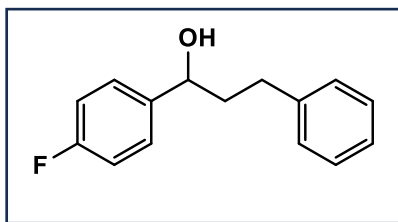

**$^{19}\text{F}\{^1\text{H}\}$  NMR (470 MHz,  $\text{CDCl}_3$ ), 25d**

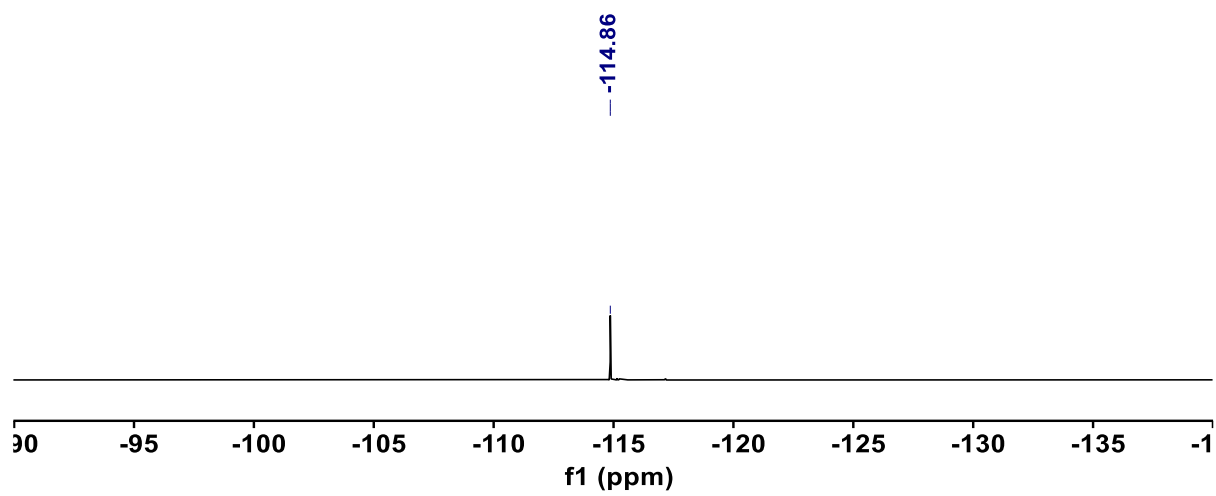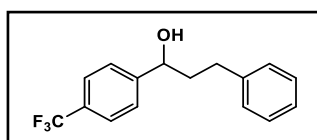

**$^{19}\text{F}\{^1\text{H}\}$  NMR (470 MHz,  $\text{CDCl}_3$ ), 27d**

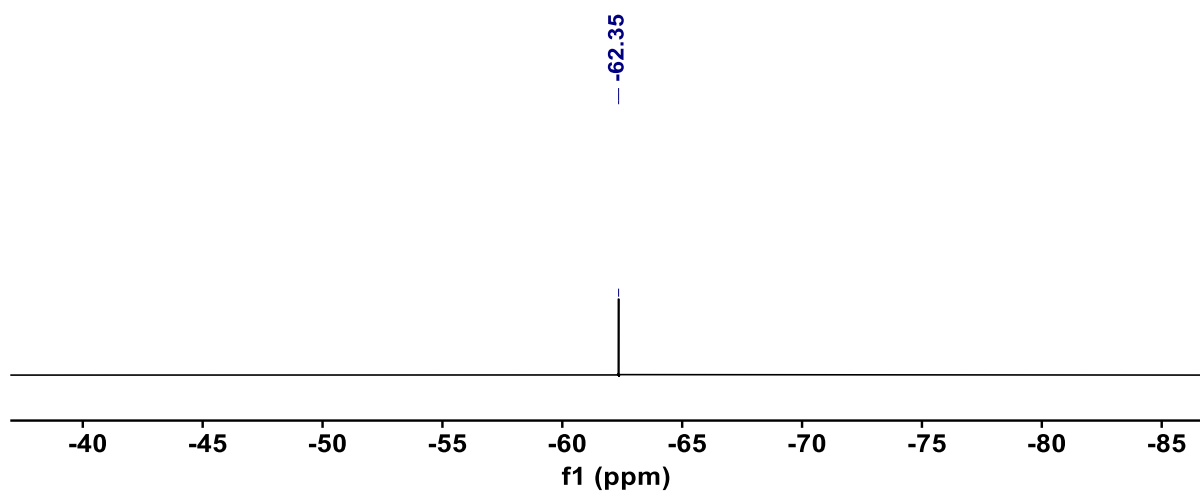

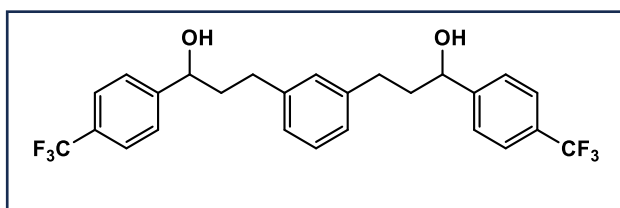

$^{19}\text{F}\{^1\text{H}\}$  NMR (470 MHz,  $\text{CDCl}_3$ ), **43d**

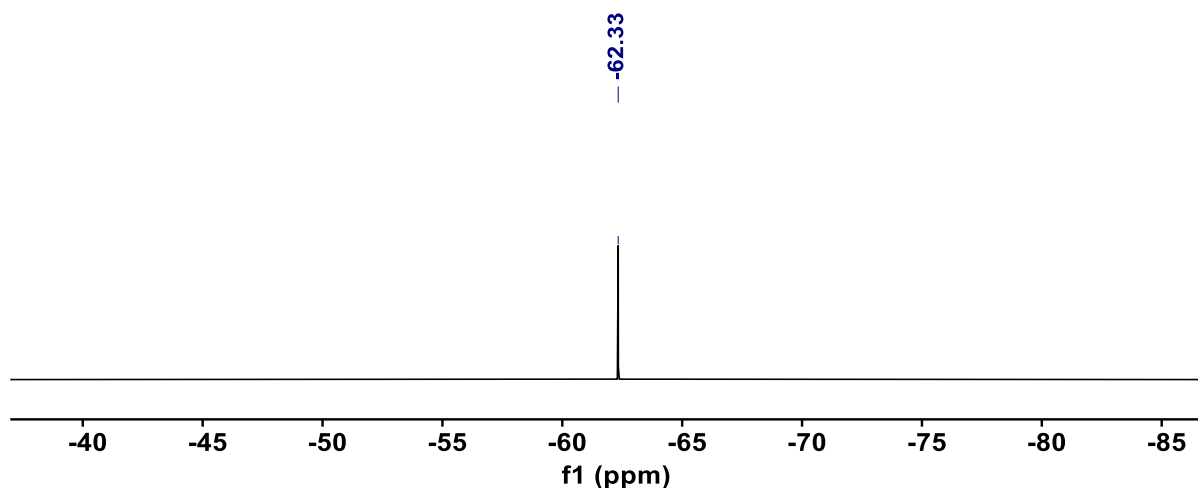

## 14. References

1. S. Fu, N.-Y. Chen, X. Liu, Z. Shao, S.-P. Luo and Q. Liu, Ligand-Controlled Cobalt-Catalyzed Transfer Hydrogenation of Alkynes: Stereodivergent Synthesis of *Z*- and *E*-Alkenes, *J. Am. Chem. Soc.*, 2016, **138**, 8588–8594.
2. A. Sau, D. Mahapatra, S. Dey, D. Panja, S. Saha and S. Kundu, Utilization of Methanol for Condensation Interrupted Chemoselective Transfer Hydrogenation of C=C, C=O, and C=N Bonds under Low Catalyst Loading, *Org. Chem. Front.*, 2023, **10**, 2274–2286.
3. R. Cariou, J. J. Chirinos, V. C. Gibson, G. Jacobsen, A. K. Tomov, G. J. P. Britovsek and A. J. P. White, The effect of the central donor in bis(benzimidazole)-based cobalt catalysts for the selective cis-1,4 polymerisation of butadiene, *Dalton Trans.*, 2010, **39**, 9039–9045.
4. V. O. Rodionov, S. I. Presolski, S. Gardinier, Y.-H. Lim and M. G. Finn, Benzimidazole and related ligands for Cu-catalyzed azide-alkyne cycloaddition, *J. Am. Chem. Soc.*, 2007, **129**, 12696–12704.

5. G.-L. Li, Z. Zhuo, B. Wang, X.-L. Cao, H.-F. Su, W. Wang, Y.-G. Huang and M. Hong, Constructing  $\pi$ -Stacked Supramolecular Cage Based Hierarchical Self-Assemblies via  $\Pi \cdots \pi$  Stacking and Hydrogen Bonding, *J. Am. Chem. Soc.*, 2021, **143**, 10920–10929.
6. G. M. Sheldrick, A short history of SHELX, *Acta Crystallogr., Sect. A: Found. Crystallogr.*, 2008, **64**, 112–122.
7. G. M. Sheldrick, Crystal structure refinement with SHELXL, *Acta Crystallogr., Sect. C: Struct. Chem.*, 2015, **71**, 3–8.
8. O. V. Dolomanov, L. J. Bourhis, R. J. Gildea, J. A. K. Howard and H. Puschmann, OLEX2: A complete structure solution, refinement and analysis program, *J. Appl. Crystallogr.*, 2009, **42**, 339–341.
9. *SAINT and SADABS, versions 6.02 and 2.03*, Bruker AXS Inc., Madison, WI, 2002.
10. G. W. T. M.J. Frisch, H.B. Schlegel, G.E. Scuseria, M.A. Robb, J.R. Cheeseman, G., V. B. Scalmani, B. Mennucci, G.A. Petersson, H. Nakatsuji, M. Caricato, X. Li, H.P., A. F. I. Hratchian, J. Bloino, G. Zheng, J.L. Sonnenberg, M. Hada, M. Ehara, K. Toyota, J. H. R. Fukuda, M. Ishida, T. Nakajima, Y. Honda, O. Kitao, H. Nakai, T. Vreven, J.A., J. E. P. Montgomery, F. Ogliaro, M. Bearpark, J.J. Heyd, E. Brothers, K.N. Kudin, V.N., R. K. Staroverov, J. Normand, K. Raghavachari, A. Rendell, J.C. Burant, S.S. Iyengar, M. C. J. Tomasi, N. Rega, J.M. Millam, M. Klene, J.E. Knox, J.B. Cross, V. Bakken, C., J. J. Adamo, R. Gomperts, R.E. Stratmann, O. Yazyev, A.J. Austin, R. Cammi, C., J. W. O. Pomelli, R.L. Martin, K. Morokuma, V.G. Zakrzewski, G.A. Voth, P. Salvador, S. D. J.J. Dannenberg, A.D. Daniels, Farkas, J.B. Foresman, J.V. Ortiz, J. Cioslowski, and D. J. Fox, in *Gaussian 09, Revision A.02*, Gaussian, Inc., Wallingford CT, (2016).
11. Y. Zhao and D. G. Truhlar, The M06 suite of density functionals for main group thermochemistry, thermochemical kinetics, noncovalent interactions, excited states, and transition elements: two new functionals and systematic testing of four M06-class functionals and 12 other functionals, *Theor. Chem. Acc.*, 2008, **120**, 215–241.
12. R. Ditchfield, W. J. Hehre, J. A. Pople, Self-Consistent Molecular-Orbital Methods. IX. An Extended Gaussian-Type Basis for Molecular-Orbital Studies of Organic Molecules, *J. Chem. Phys.* 1971, **54**, 724–728



13. (a) J. Tomasi and M. Persico, Molecular Interactions in Solution: An Overview of Methods Based on Continuous Distributions of the Solvent, *Chem. Rev.*, 1994, **94**, 2027–2094. (b) A. J. Jesus, L. I. Tomé, M. E. Eusébio, M. T. Rosado and J. S. Redinha, Hydration of cyclohexylamines: CPCM calculation of hydration Gibbs energy of the conformers, *The journal of physical chemistry. A* 2007, **111**, 3432-7.
14. V. G. Landge, J. Pitchaimani, S. P. Midya, M. Subaramanian, V. Madhu and E. Balaraman, Phosphine-free cobalt pincer complex catalyzed Z-selective semi-hydrogenation of unbiased alkynes, *Catal. Sci. Technol.*, 2018, **8**, 428–433.
15. D. M. Sharma, C. Gouda, R. G. Gonnade and B. Punji, Room temperature Z-selective hydrogenation of alkynes by hemilabile and non-innocent (NNN)Co(II) catalysts, *Catal. Sci. Technol.*, 2022, **12**, 1843–1849.
16. A. Brzozowska, L. M. Azofra, V. Zubar, I. Atodiresei, L. Cavallo, M. Rueping and O. El-Sepelgy, Highly Chemo- and Stereoselective Transfer Semihydrogenation of Alkynes Catalyzed by a Stable, Well-Defined Manganese(II) Complex, *ACS Catal.*, 2018, **8**, 4103–4109.
17. Z. Huang, Y. Wang, X. Leng and Z. Huang, An Amine-Assisted Ionic Monohydride Mechanism Enables Selective Alkyne cis-Semihydrogenation with Ethanol: From Elementary Steps to Catalysis, *J. Am. Chem. Soc.*, 2021, **143**, 4824–4836.
18. R. Kusy and K. Grela, Ligand-free (Z)-selective transfer semihydrogenation of alkynes catalyzed by in situ generated oxidizable copper nanoparticles, *Green Chem.*, 2021, **23**, 5494–5502.
19. G.-H. Wang, H.-Y. Bin, M. Sun, S.-W. Chen, J.-H. Liu and C.-M. Zhong, Copper-catalyzed Z-selective Semihydrogenation of Alkynes with Hydrosilane: a Convenient Approach to Cis-Alkenes, *Tetrahedron*, 2014, **70**, 2175–2179.
20. M. Das and D. F. O'Shea, Z-Stereoselective Aza-Peterson Olefinations with Bis(trimethylsilane) Reagents and Sulfinyl Imines, *Org. Lett.*, 2016, **18**, 336.
21. A. Mandal, K. Ganguli, M. Pradhan, A. Gorai and S. Kundu, Selective transfer hydrogenation of C=O and conjugated C=C bonds using an NHC-based pincer (CNC)MnI complex in methanol, *ChemSusChem*, 2023, **16**, e202300683.

22. B. C. Roy, S. Debnath, K. Chakrabarti, B. Paul, M. Maji and S. Kundu, *ortho*-Amino group functionalized 2,2'-bipyridine based Ru(ii) complex catalysed alkylation of secondary alcohols, nitriles and amines using alcohols, *Org. Chem. Front.*, 2018, **5**, 1008–1018.
23. S. Shee, B. Paul, D. Panja, B. C. Roy, K. Chakrabarti, K. Ganguli, A. Das, G. K. Das and S. Kundu, Tandem Cross Coupling Reaction of Alcohols for Sustainable Synthesis of  $\beta$ -Alkylated Secondary Alcohols and Flavan Derivatives, *Adv. Synth. Catal.*, 2017, **359**, 3888–3893.
24. Q. Xu, J. Chen, H. Tian, X. Yuan, S. Li, C. Zhou and J. Liu, Catalyst-Free Dehydrative  $\alpha$ -Alkylation of Ketones with Alcohols: Green and Selective Autocatalyzed Synthesis of Alcohols and Ketones, *Angew. Chem., Int. Ed.*, 2014, **53**, 225–229.
25. A. Kanchanadevi, R. Ramesh and D. Semeril, Efficient and recyclable Ru(II) arene thioamide catalysts for transfer hydrogenation of ketones: Influence of substituent on catalytic outcome, *J. Organomet. Chem.*, 2016, **808**, 68–77.
